# Supplementary material
Source: publisher figshare collection journal article supplement (https://wiley.figshare.com/articles/dataset/_/11353085)
Supplement: Supplementary file 1 [file 1]

## Sheet: EE2 D1
All Metabolites				Increased Metabolites					Decreased Metabolites
RT (min)	Mass	EE2 - CTL		RT (min)	Mass	EE2 - CTL	Metabolites		RT (min)	Mass	EE2 - CTL	Metabolites
8.20667	75	-10106.2		8.2975	144	6643.17			8.20667	75	-10106.2
8.25833	65	-6509.17		8.29833	143	48532.6			8.25833	65	-6509.17
8.2825	143	-66767.6		8.31667	61	8239.3	Pyridine		8.2825	143	-66767.6
8.28333	73	-108735		8.31917	129	7352.83			8.28333	73	-108735
8.28583	109	-419.867		8.32417	73	68687.2			8.65833	60	-6790.93
8.2975	144	6643.17		8.86	72	7058.07	carbamate		8.66	75	-22358.2
8.29833	143	48532.6		9.13917	147	14347.2	Propanoic acid, 2 TMS		8.7425	117	-45781.9
8.30083	97	122		9.85833	75	11179.1			8.89333	77	-7428.9
8.31667	61	8239.3		10.0917	75	16054.9			8.9925	147	-22246.1
8.31917	129	7352.83		10.1517	101	6500.23	l-Alanine		10.0933	101	-5654.27
8.32417	73	68687.2		10.1858	79	27294.5			10.2333	79	-42521.8	Sarcosine
8.36917	72	-505.433		10.2917	101	47343.3			10.2342	66	-33372.1
8.37417	172	2337.77		10.2933	79	40410.8			10.3242	73	-2.80089e+06
8.41667	151	221.067		10.3658	67	6731.93			10.3483	79	-41345.8
8.46417	130	-2317.73		10.41	79	37146.5			10.3492	93	-6799.03
8.53333	126	-249.4		10.975	147	7480.67	Ethanedioic acid, 2 TMS		10.5875	79	-63960.4
8.53917	168	-561		11.3308	89	9031.43			10.6142	259	-87090.3
8.54333	140	-67.2667		11.37	73	24056.1			10.885	116	-6072.13
8.58667	77	532.567		11.6775	73	263501			11.9275	116	-16473.2	Phosphoric acid, 2 TMS
8.60583	143	-651		11.6783	281	96957.7	sulfate, 2 TMS		12.3542	73	-59299.9
8.6175	126	155.2		11.73	79	12335.6			13.2525	131	-9145.4	urea
8.65	132	-2903.13		13.1083	73	12781.5			13.4233	77	-6413.63
8.65667	206	-178.733		14.0867	221	6616.83	Butanoic acid, 2 TMS		13.9808	86	-7753.63
8.65833	60	-6790.93		14.5975	78	14562.7	Glycine, 3 TMS		14.0083	76	-10114.1
8.66	75	-22358.2		14.7158	66	23945	silanol		14.01	75	-174434
8.70417	143	3117.1		14.9133	79	16332.3			14.0367	315	-32291.8
8.73167	157	840.5		14.9375	78	6065.5			14.0483	177	-17614.1	glycerol
8.7425	117	-45781.9		14.9492	83	5973.73			14.0533	116	-18541.6
8.77417	93	1532.23		14.95	150	14815.8			14.0542	102	-6666.8
8.8225	95	1318.93		14.9508	148	216061	Butanedioic acid, 2 TMS		14.0558	89	-38385.7
8.82333	199	-56.2667		14.9525	66	44870.4			14.2642	73	-125433	Glycolic acid, 1 TMS
8.83333	83	-4036.5		14.9533	133	60918.1			14.4508	135	-5000.3	L-isoleucine, 2 TMS
8.84583	69	-2474.1		14.9542	101	20384			14.4608	133	-11942.2
8.84667	157	-76.7		14.955	117	35352.4			14.6567	73	-110016
8.8475	84	-2037.1		15.0033	66	11382.5			14.8567	133	-5454.87
8.86	72	7058.07		15.3875	79	11896.4	pyrimidine/uracil		17.0117	86	-43973.9
8.87583	88	1914		15.4275	75	29031.1			17.0125	115	-16724.1
8.89333	77	-7428.9		15.4325	243	6496.43			17.0133	73	-565844	L-proline
8.91333	118	655.267		15.4333	257	9340.3			17.0142	129	-32952.9
8.91667	160	364.667		15.4342	70	24545.6			17.0167	100	-27111.9
8.9325	175	28.9333		15.4433	71	9640.13			17.02	99	-9846.87
8.93667	119	-819.367		15.4442	133	6285.33	Pyrimidine, 2 TMS		18.0525	175	-22185.8	Acetic acid, 1 TMS
8.94583	171	122.467		15.4467	74	18719.4			18.0533	174	-163894
8.96333	128	121.167		15.4475	149	7220.43			18.13	89	-6344.57
8.98167	107	-151.7		15.4483	73	153885			18.1875	73	-390701
8.9925	147	-22246.1		15.4492	147	97187.2			18.1892	75	-68764
8.99583	127	125.533		15.45	117	6024.67			18.19	117	-10559.5
8.99833	84	-1071.97		15.4508	87	5992.37			18.1933	70	-21808.1	L-aspartic acid
9.03	72	-4886.93		15.4558	101	16360.1			18.1942	188	-25998.1
9.06333	295	172.833		15.4575	85	16991.3			18.1958	174	-9991.3
9.06833	170	-1108.43		15.4583	105	6032.23			18.4208	74	-17298.7
9.12917	171	42.2667		15.4592	72	30639.6			18.425	73	-150587	silane
9.13667	151	331.1		15.46	100	42797.6			18.4258	61	-11872.6
9.13917	147	14347.2		15.4608	241	70257.2			18.4775	116	-14196.8
9.15083	177	345.833		15.4617	99	171623			18.5292	101	-5027.83
9.16167	247	206.933		15.7692	79	7840.37	2-Butenedioic acid, 2 TMS		18.5325	86	-13545.2	L-aspartic acid, 3 TMS
9.16333	263	40.1667		15.8433	79	6724.87	Serine, 3 TMS		18.5333	75	-26089.9
9.175	211	31		17.4183	89	5797.67			18.5342	73	-151762
9.1875	96	496.233		17.4217	84	7779.67	Propanoic acid, 3 TMS		18.6475	254	-11633.5
9.19	140	80.2		17.9125	79	7140.03			18.6625	100	-21533.4	Butanedioic acid, 3 TMS
9.2275	170	-337.5		18.1492	75	7983.3			18.7042	64	-10000.7
9.29333	193	735.3		18.3475	147	7977.37	Aminomalonic acid - Pyruvate + Aminomalonate <=> L-Alanine + Oxomalonate		18.7933	115	-8561.7
9.39167	188	-127.033		18.3492	129	6141.73			18.8183	254	-6306.4
9.39667	122	-1684.53		18.3825	75	6752.6			19.8225	100	-9095.57
9.4	144	-158.4		19.3833	81	5005.17			19.87	100	-8508.83	á-Hydroxypyruvic acid, 2 TMS
9.4125	118	-1518.97		19.4083	80	10522.9			19.9367	100	-5476.6
9.41667	143	-158.633		19.4833	147	22463.1			19.9908	100	-16806.9
9.4175	61	-4362.97		19.6233	64	5381.5			21.7925	73	-137400	Gluconic acid
9.4325	149	-1938.87		20.0642	73	48037.7			22.27	133	-227530
9.4975	256	-22.9		20.0867	117	7353.03			22.2767	190	-19550.5	silanamine
9.54417	63	344.433		20.1025	147	10117.2			22.3183	175	-62533.8
9.55833	77	-1961.5		20.1417	75	9310.8			22.3375	106	-8176.53
9.55917	97	-217		20.165	75	10095			22.3517	147	-689628	Taurine
9.5625	83	-913.667		20.5542	73	47061.3			22.3642	87	-22118.6
9.57083	81	-129.433		20.6367	160	6650.1			22.4008	130	-177432
9.61583	144	-159.667		20.6792	73	76751.9			22.4558	327	-178909
9.61667	131	-1401.27		20.7708	100	9594.9			22.8117	74	-9738.97
9.64167	105	117.667		20.8233	75	19688	Ornithine		22.8217	73	-115491
9.65333	71	-488.233		20.8325	73	60921.9			22.9217	73	-88092.6
9.655	95	-198.267		20.9192	72	16017.4			23.0108	79	-5467.9
9.6825	168	-148.933		20.98	70	12087.9			23.0383	100	-6022.97
9.685	241	-36.7667		21.02	100	47584.3			23.0558	133	-6166.2
9.68583	195	-150.767		21.0275	148	6966.5			23.1075	73	-50362.7
9.68833	228	20.5		21.1083	160	5238.4			23.1617	100	-5423.8
9.69083	156	34.9333		21.2017	156	26999.7	Glutamic acid, 3 TMS		23.1942	73	-36345.6
9.69333	122	-499.367		21.2467	248	9527.07			23.2942	73	-24641.9
9.70083	123	-522.433		21.2483	246	89833.5			24.83	75	-53628.2
9.70583	76	-1861.47		21.305	142	8133.5			24.8308	147	-50067.8
9.70833	60	-1613.73		21.33	105	6975.93			24.8317	129	-9470.17
9.71583	91	422.667		21.46	74	9509.77
9.72417	110	27.2		21.4608	73	71987.4
9.73917	193	393.333		21.4625	221	6891.8
9.74417	248	63.1667		21.8625	205	5844.33
9.74917	191	409.867		21.8633	204	11398.8
9.76083	85	2207.47		22.17	64	40302.9
9.78	182	19.3667		22.1708	217	5426
9.80083	105	2816.83		22.235	105	10884.2
9.8525	137	26.8333		22.2467	89	8947.47
9.85833	75	11179.1		22.4575	74	12459.8
9.915	69	1572.17		23.7475	73	9025.33	2-Deoxy-D-ribose
9.9375	149	1859.87		24.3833	73	5892.87
9.95083	84	201.633		24.87	133	33468.6
9.96333	74	3385.47		24.8733	273	59916.2	1,2,3-Propanetricarboxylic acid, 4 TMS
10.0217	132	293.467		24.8742	67	25852
10.0233	133	376		24.9225	89	5093.87
10.035	101	808.033		25.7658	103	9269.77
10.055	207	363.533		25.7708	73	44833.6
10.0917	75	16054.9		25.7725	217	6233.6	Glycoside, 3 TMS
10.0933	101	-5654.27		25.775	147	5988.1
10.1058	134	-241.5		25.9917	73	65010.6
10.1517	101	6500.23		26.0017	75	13270.9
10.1858	79	27294.5		26.005	74	5537.9	d-Glucose, 5 TMS
10.2167	63	-4038.83		26.0092	103	5886.97
10.2333	79	-42521.8		26.0758	73	29760.5
10.2342	66	-33372.1		26.5525	147	94552	d-Galactose, 5 TMS
10.2783	82	-4208.97		26.9225	73	17412.1
10.2917	101	47343.3		27.095	73	30667.6
10.2933	79	40410.8		27.86	73	11148.2
10.3242	73	-2.80089e+06		29.995	103	7448.77
10.335	181	127.833		30.0008	147	8113.17	d-Mannose, 5 TMS
10.3483	79	-41345.8		30.0017	73	42593.1
10.3492	93	-6799.03		30.1733	73	6811.7
10.3658	67	6731.93		31.1258	73	10212.4
10.3808	139	174.833		28.815	73	2017.9	hexadecanoic acid
10.41	79	37146.5		16.3058	116	1134.13	L-threonine
10.42	85	2134.07		12.8042	191	1230.63	L-valine
10.4258	65	-469.6
10.4592	143	-202.2
10.5458	87	-2687.27
10.5875	79	-63960.4
10.6142	259	-87090.3
10.6658	92	-111.767
10.6692	377	-24.5
10.7008	285	209.667
10.7575	204	2312.33
10.7633	133	1127.17
10.765	150	149.3
10.7692	190	343.267
10.7967	80	244.533
10.8	205	706.867
10.8117	69	916.5
10.8292	60	821.7
10.83	94	132.833
10.8317	89	440.367
10.835	191	85.3333
10.8375	115	524.767
10.8467	149	1298.7
10.8783	85	323.833
10.8842	87	658.5
10.885	116	-6072.13
10.9217	98	-45.8667
10.9233	355	140.567
10.9275	78	-3063.27
10.975	147	7480.67
11.0025	119	-1236.83
11.0167	86	-1302.57
11.0808	261	-37.2333
11.0892	136	-1981.87
11.0925	98	-1097.33
11.0942	129	-1776.47
11.1042	283	-21.2333
11.1225	80	-959.067
11.1833	359	50.1667
11.1842	267	119.333
11.2392	122	-676.9
11.245	93	-608.7
11.2758	187	622.567
11.2833	176	106.4
11.3033	161	173.267
11.3083	154	228.133
11.3183	86	1034.53
11.325	111	126.133
11.3275	83	477.767
11.3308	89	9031.43
11.3425	169	21.4667
11.3592	106	128.067
11.3658	97	208.633
11.3667	92	243.467
11.3683	64	197.067
11.37	73	24056.1
11.3942	75	2960.5
11.3992	119	123.933
11.4075	133	209.033
11.4175	130	-312.8
11.4192	207	728.333
11.4225	208	170.667
11.4233	337	75.3333
11.445	176	-259.7
11.4567	130	486.933
11.4592	115	2551.2
11.4617	250	29.0333
11.5083	255	21.9667
11.5167	190	134.533
11.5425	264	30.3
11.6033	76	676.667
11.6133	77	-4454.3
11.6475	172	2294.43
11.6517	108	-228.167
11.6658	173	279.067
11.6675	297	42.2
11.6683	258	161.3
11.6692	277	253.567
11.6775	73	263501
11.6783	281	96957.7
11.68	263	308.367
11.6817	256	129
11.6825	201	231.467
11.6842	354	220.433
11.6875	234	197.633
11.6883	273	137.767
11.6908	321	170.533
11.6933	68	636.767
11.6942	196	146.1
11.695	278	90.9
11.6975	224	135.6
11.6992	262	111.467
11.7083	305	69.9667
11.7175	62	-431.8
11.73	79	12335.6
11.785	330	34.6
11.8217	172	1001.73
11.8533	120	44.5
11.8633	171	136.5
11.9275	116	-16473.2
11.9308	90	-957.7
11.9883	131	-4542.53
12.0533	171	30.7667
12.0625	90	-667.2
12.0758	156	73.5667
12.2508	187	49.0333
12.3517	103	-2324.9
12.3525	62	-172.1
12.3542	73	-59299.9
12.3683	185	403.533
12.37	89	2579.97
12.3725	217	1128.97
12.3742	218	299.433
12.3808	105	298.667
12.4317	211	-1818.1
12.4408	75	2318.1
12.4617	145	146.1
12.4642	101	194.933
12.465	218	128.467
12.4758	115	348.367
12.735	227	-1035.4
12.7742	210	70.1667
12.7825	206	42.5667
12.7867	115	742.933
12.7958	93	213.7
12.8042	191	1230.63
12.8242	209	515.067
12.825	208	827.933
12.8433	125	-61.2
12.8625	199	-23.1
12.875	207	-3239.7
12.8775	211	-774.033
12.8833	208	-567.133
12.885	75	2946
12.8883	209	-493.233
12.8908	225	-533.533
12.8983	191	-816.367
12.9408	131	-4107.63
12.9692	82	869.867
13.0208	138	16.6667
13.0758	148	-3060.2
13.0833	134	-149.567
13.1033	245	113.5
13.1067	65	53.3333
13.1083	73	12781.5
13.1092	75	3944
13.1142	133	1190.37
13.125	148	1349.57
13.1367	218	475.667
13.1525	211	-98.9667
13.165	218	45.5
13.1817	191	-550.833
13.1892	221	-336.067
13.2292	163	-147.8
13.245	407	13.1667
13.2483	95	-190.2
13.2517	132	-1065.47
13.2525	131	-9145.4
13.2633	248	293.133
13.2733	262	-28.9333
13.32	65	30.7333
13.3625	89	196.5
13.3667	196	-130.333
13.3767	151	-492.9
13.3808	60	-476.1
13.385	191	85.8667
13.3875	117	-1618
13.3975	65	-103.267
13.4142	184	-37.1333
13.4183	88	-517.667
13.4208	242	-2421.33
13.4217	150	-1005.73
13.4233	77	-6413.63
13.4242	146	-1678.4
13.425	69	-445.5
13.4292	145	-100.7
13.4317	170	-173.4
13.4825	187	-47.2
13.49	132	-104.8
13.5125	151	69.0667
13.5367	284	-31
13.5533	63	-268.9
13.555	122	-116.5
13.5767	107	-276.567
13.58	60	-509.6
13.5883	184	146.467
13.595	64	-116.767
13.6317	60	-327.5
13.6417	221	-445.7
13.6433	193	-587.867
13.6525	237	-31.1667
13.6642	327	7.66667
13.7367	115	445.533
13.755	70	1349.07
13.8683	148	3526.67
13.905	105	872.833
13.9167	113	-207.533
13.9375	249	289.767
13.9383	335	533.2
13.9392	221	428.7
13.9758	405	-46.4667
13.9808	86	-7753.63
13.9817	170	-2053.87
13.985	231	-1197.67
13.9858	335	-1184.13
13.9883	247	-511.7
14.0083	76	-10114.1
14.01	75	-174434
14.0367	315	-32291.8
14.0425	172	-869.933
14.0433	162	-1765.27
14.0467	157	-1011.8
14.0483	177	-17614.1
14.0533	116	-18541.6
14.0542	102	-6666.8
14.055	174	-2159.9
14.0558	89	-38385.7
14.065	69	-2497.17
14.0867	221	6616.83
14.12	311	-45.6333
14.1208	196	207.667
14.1258	218	2097.2
14.1592	156	92.2667
14.165	68	-720.6
14.1683	95	-1230.93
14.205	177	-1866.3
14.2058	138	-588.667
14.2275	120	-927.767
14.2308	221	-755.967
14.2642	73	-125433
14.2958	104	-1658.17
14.3	77	3292.27
14.3017	117	-1705.47
14.3108	227	-642.5
14.3117	99	-321.867
14.36	72	-4438.63
14.3683	172	96.4667
14.3817	182	-528.333
14.395	166	-208.867
14.4067	91	-1299.87
14.4133	70	-2214.6
14.425	121	-2189.17
14.4333	179	-601.333
14.4508	135	-5000.3
14.4542	91	-1432.87
14.4575	105	-2161.07
14.4592	134	-2030.4
14.4608	133	-11942.2
14.4833	302	-865.7
14.5042	314	-3467.9
14.5058	212	-843.2
14.5175	95	749.467
14.5217	78	1678.63
14.5275	180	-300.833
14.5367	301	-3392.73
14.5383	90	-192.9
14.57	163	-740
14.5725	301	2505.17
14.5958	181	2466.83
14.5975	78	14562.7
14.6217	245	86.1
14.625	314	-3796.3
14.6358	363	-9.4
14.65	202	-68.8
14.6567	73	-110016
14.6583	151	-1430.67
14.6592	184	-254.7
14.66	263	-226.867
14.7158	66	23945
14.74	137	-1977.57
14.7433	91	-1021.53
14.755	181	-2436.2
14.7658	165	-532.8
14.7942	387	39.1667
14.8233	88	-377.567
14.8367	118	-104.5
14.8567	133	-5454.87
14.9133	79	16332.3
14.9308	283	302.5
14.9375	78	6065.5
14.9475	250	2677.1
14.9483	160	527.833
14.9492	83	5973.73
14.95	150	14815.8
14.9508	148	216061
14.9517	73	1.11549e+06
14.9525	66	44870.4
14.9533	133	60918.1
14.9542	101	20384
14.955	117	35352.4
14.9567	164	1442.07
14.9608	162	1445.37
14.9775	139	143.467
15.0033	66	11382.5
15.05	145	143
15.07	123	-273.533
15.0758	66	4700.03
15.0825	89	1276.93
15.0858	85	-738.667
15.135	76	574.467
15.1475	130	-142.4
15.165	66	3679.4
15.18	74	3927.17
15.185	63	348.433
15.1983	61	1334.43
15.225	211	1265.5
15.2533	127	72.9
15.2567	160	43.4667
15.2642	222	97.9
15.2725	159	95.3333
15.3192	78	1734.93
15.3375	263	-489.067
15.3875	79	11896.4
15.4242	121	435.233
15.4275	75	29031.1
15.4325	243	6496.43
15.4333	257	9340.3
15.4342	70	24545.6
15.4358	68	4277.47
15.4375	97	2771.6
15.4392	116	2852.97
15.4417	153	4100.83
15.4425	115	4072.53
15.4433	71	9640.13
15.4442	133	6285.33
15.4458	156	1792.67
15.4467	74	18719.4
15.4475	149	7220.43
15.4483	73	153885
15.4492	147	97187.2
15.45	117	6024.67
15.4508	87	5992.37
15.4517	91	904.7
15.4525	166	779.267
15.4533	183	2581.7
15.4558	101	16360.1
15.4567	110	1471.43
15.4575	85	16991.3
15.4583	105	6032.23
15.4592	72	30639.6
15.46	100	42797.6
15.4608	241	70257.2
15.4617	99	171623
15.4667	415	33.2
15.4817	180	465.833
15.4967	106	422.5
15.5142	151	-607.4
15.5175	69	988.967
15.5617	103	-1406.17
15.5708	255	407.867
15.5942	241	712.067
15.6275	103	-772.033
15.6467	145	-78.9667
15.6483	255	134.233
15.6592	314	696.333
15.7408	225	51.5333
15.7692	79	7840.37
15.78	204	2982.43
15.82	137	-183.667
15.8433	79	6724.87
15.865	93	284.967
15.9	258	29
15.9067	195	200.833
15.925	97	185.433
15.9267	81	356.567
15.9358	67	830.167
15.9458	242	182.233
15.9892	174	103.067
16.0367	88	114.567
16.1442	89	120.767
16.2225	63	-30.2
16.2808	105	95.1667
16.2925	233	68.5
16.2933	61	664.767
16.2983	247	447.3
16.3008	248	90.9667
16.3058	116	1134.13
16.3275	266	24.0333
16.335	89	212.633
16.34	107	46.3667
16.3417	174	1698.7
16.3942	204	46.3667
16.475	256	68.6667
16.5325	77	-577.833
16.58	103	-552.533
16.6108	139	-134.133
16.63	117	-4442.67
16.6317	174	2653.67
16.6358	84	2289.77
16.6367	77	-1395.77
16.6375	90	99.6667
16.6408	276	124.133
16.6483	142	61.9667
16.6542	277	43.2
16.6858	155	1047.33
16.6892	156	59.8
16.7017	193	-218.867
16.705	75	3183.33
16.7075	146	-124.267
16.7083	250	-42.3
16.7125	310	-29.0667
16.7225	70	-271.733
16.7233	69	-993.867
16.74	72	-168.233
16.7475	69	623.667
16.7717	88	1117.47
16.7808	116	1162.1
16.7825	60	1416.73
16.7983	166	39.9333
16.81	71	1175.97
16.82	213	56.9
16.8408	242	53.4333
16.9	71	331.9
16.9908	161	236.433
16.9933	219	1746.33
17.0017	159	269.333
17.0033	113	191.367
17.0117	86	-43973.9
17.0125	115	-16724.1
17.0133	73	-565844
17.0142	129	-32952.9
17.015	113	-1827.73
17.0167	100	-27111.9
17.0175	163	-540.7
17.02	99	-9846.87
17.03	296	-48.8
17.0325	181	-181.667
17.0342	66	-2640.9
17.04	169	-58.5
17.0767	137	-126.3
17.0833	89	4156.57
17.1267	292	77.9
17.245	327	31.1333
17.2733	130	40.3
17.2858	232	-31.3
17.325	64	-491.5
17.4083	259	142.567
17.4108	258	153
17.4183	89	5797.67
17.4217	84	7779.67
17.425	77	3643.5
17.45	67	942.8
17.4508	94	275.133
17.4675	120	136.5
17.4883	95	368.233
17.5192	85	692.533
17.5225	261	20.6
17.5408	249	97.9667
17.5542	103	1907.7
17.5825	113	130.033
17.5875	210	-67.9
17.595	209	-239.733
17.6158	177	136.333
17.6225	177	96.0333
17.6292	103	806.667
17.6367	248	77
17.6675	90	82.7667
17.6975	85	512.9
17.7083	99	763.367
17.7125	160	775.5
17.7142	132	1993.9
17.7442	168	86.6667
17.7475	144	479.433
17.7675	91	94.3667
17.7742	128	-449.433
17.8283	160	330.467
17.8825	121	-99
17.8967	208	-99.9667
17.8992	272	158.967
17.91	155	-1528.37
17.9125	79	7140.03
17.9267	264	-25.4
17.93	158	-723.533
18.0333	65	-2980.87
18.0525	175	-22185.8
18.0533	174	-163894
18.0758	185	-186.367
18.0775	92	-1294.6
18.1283	117	1382
18.13	89	-6344.57
18.1492	75	7983.3
18.1642	123	-2361.67
18.1692	82	-2215.9
18.1875	73	-390701
18.1892	75	-68764
18.19	117	-10559.5
18.1908	64	4035.37
18.1917	190	-1582.6
18.1933	70	-21808.1
18.1942	188	-25998.1
18.1958	174	-9991.3
18.1967	281	-80.4
18.2525	128	-2494.67
18.2717	299	341.833
18.3217	140	47.8667
18.3475	147	7977.37
18.3483	83	-630.2
18.3492	129	6141.73
18.3583	103	1248.87
18.3825	75	6752.6
18.3883	113	-269
18.4	188	-600.333
18.4008	262	-26.5
18.4208	74	-17298.7
18.425	73	-150587
18.4258	61	-11872.6
18.4283	149	-3777.67
18.4442	133	-2482.27
18.4558	205	194.967
18.465	104	-1214.8
18.4708	234	325.633
18.4775	116	-14196.8
18.4817	146	-489.067
18.5292	101	-5027.83
18.5325	86	-13545.2
18.5333	75	-26089.9
18.5342	73	-151762
18.5367	88	-1983.83
18.5717	193	-830.8
18.5833	186	-168.7
18.5958	232	538.567
18.6408	93	-803.333
18.6475	254	-11633.5
18.6625	100	-21533.4
18.6833	128	2665.07
18.7042	64	-10000.7
18.7342	170	-135.2
18.75	335	47
18.7575	96	-325.433
18.7833	320	13.1667
18.7933	115	-8561.7
18.8	61	-4549.4
18.8183	254	-6306.4
18.8217	105	-2326.27
18.8292	146	-314.5
18.8975	103	3053.23
18.9308	133	1138.67
18.9575	112	-127.8
18.9925	186	-1781.67
18.9983	176	-1161
19.0392	103	3745.03
19.0692	131	254.667
19.1033	62	106.1
19.1058	103	2127.93
19.1183	281	15.1667
19.12	171	-850.467
19.1425	252	-802.933
19.2075	94	-105.033
19.2767	79	123.167
19.3833	81	5005.17
19.4083	80	10522.9
19.4208	120	233.333
19.4833	147	22463.1
19.5308	254	-1696.43
19.5525	171	3465.3
19.5575	329	221.733
19.5833	317	100.4
19.6233	64	5381.5
19.625	291	18.6
19.7167	308	34.4
19.8042	156	-3448.53
19.8225	100	-9095.57
19.8475	70	-1811.47
19.87	100	-8508.83
19.8717	170	-2851.93
19.9367	100	-5476.6
19.9633	200	-67.1333
19.9775	170	-1942.9
19.9808	220	-3447.5
19.9842	218	-4296.1
19.9908	100	-16806.9
20.0033	99	-4407.9
20.0642	73	48037.7
20.085	321	61.1333
20.0867	117	7353.03
20.0892	118	379.3
20.0908	61	683.267
20.0917	103	3502.1
20.095	133	2128.7
20.0958	74	4434
20.0967	149	1234.9
20.0983	292	2364.77
20.0992	205	1775.47
20.1	204	310.467
20.1008	243	23.8333
20.1025	147	10117.2
20.1125	72	2938.5
20.1183	193	34.1333
20.1192	150	98.7
20.12	218	510.467
20.1417	75	9310.8
20.1442	175	105.133
20.165	75	10095
20.2183	117	3418.9
20.2283	81	23.7333
20.3208	232	995.967
20.3217	101	871.733
20.3942	261	161.633
20.4017	61	876.033
20.4025	100	3192.93
20.4775	67	275.833
20.4883	139	-41.4
20.495	72	-1937.2
20.5033	173	-662.7
20.5067	233	350.733
20.53	216	1474.2
20.5308	142	2472.1
20.545	119	238.333
20.5492	69	757.3
20.5542	73	47061.3
20.555	74	3376.97
20.5558	334	367.6
20.56	66	396.2
20.6075	80	214.567
20.6292	79	-82.1
20.6367	160	6650.1
20.6492	101	1050.63
20.6517	232	4995.3
20.6692	184	9.1
20.6792	73	76751.9
20.7192	133	1988.2
20.7242	232	4677.2
20.7383	98	-1044.47
20.7692	130	690.4
20.7708	100	9594.9
20.775	85	534.1
20.7767	102	942.833
20.7833	76	933.967
20.7842	60	930.1
20.8	129	378.633
20.8233	75	19688
20.8317	74	4921.67
20.8325	73	60921.9
20.9192	72	16017.4
20.9208	76	4488.33
20.94	350	303.233
20.9567	118	2279.8
20.98	70	12087.9
20.9858	87	2075
20.9867	163	1385.43
20.9908	71	2008.77
21.02	100	47584.3
21.0275	148	6966.5
21.0683	79	3879.27
21.1042	176	1394.97
21.1083	160	5238.4
21.1142	153	335.533
21.2017	156	26999.7
21.2108	179	621
21.2467	248	9527.07
21.2483	246	89833.5
21.2675	312	222.033
21.2742	93	880.3
21.2842	79	4368.8
21.305	142	8133.5
21.3092	235	189.4
21.3258	281	227.533
21.33	105	6975.93
21.34	106	910.4
21.3408	181	679.733
21.3433	93	1292.17
21.4208	80	343.4
21.4383	81	952.367
21.45	183	1994.5
21.46	74	9509.77
21.4608	73	71987.4
21.4625	221	6891.8
21.4633	325	681.667
21.465	87	1188.4
21.4683	193	954.5
21.4717	267	1116.6
21.475	172	259.067
21.4767	93	491.1
21.4825	156	4865.63
21.4975	269	159.1
21.4983	96	-304.3
21.5825	503	78.4333
21.6575	247	41.6667
21.7633	89	837.333
21.7683	204	1127.9
21.7775	69	562.2
21.7833	77	1254.1
21.785	138	-164.567
21.7925	73	-137400
21.7933	60	-2045.33
21.8625	205	5844.33
21.8633	204	11398.8
21.8642	127	179.067
21.865	201	4402.73
21.8667	172	1979.97
21.8683	84	1478.2
21.87	256	563.567
21.8725	292	234.667
21.8733	207	666.6
21.8758	143	671.367
21.8775	190	656.8
21.8983	114	331.3
21.9	332	135.4
21.9017	202	735.067
21.9033	291	737.767
22.0333	103	3025.77
22.0417	328	-35.3
22.0592	205	111.167
22.0675	346	81.6667
22.1075	244	248.7
22.155	94	-892.333
22.17	64	40302.9
22.1708	217	5426
22.1725	320	1328.9
22.235	105	10884.2
22.2417	121	2895.77
22.2458	91	3203.5
22.2467	89	8947.47
22.2558	294	-901
22.27	133	-227530
22.2767	190	-19550.5
22.3033	228	-3445.1
22.3183	175	-62533.8
22.3375	106	-8176.53
22.3517	147	-689628
22.3642	87	-22118.6
22.4008	130	-177432
22.4558	327	-178909
22.4575	74	12459.8
22.505	330	131.5
22.515	266	106.133
22.5758	167	-217.933
22.5817	85	665.333
22.665	191	-188.933
22.6858	170	-387.9
22.6867	71	-1543.43
22.7683	106	-1066.5
22.7708	160	-2173.1
22.81	131	-4066.6
22.8117	74	-9738.97
22.8183	134	-1358.27
22.8217	73	-115491
22.8225	98	-842.067
22.8467	72	-3000.07
22.8592	219	-300.167
22.8717	329	-307.4
22.8883	168	13.1667
22.89	233	21.3333
22.9175	149	-1598.93
22.9217	73	-88092.6
22.9442	160	787.833
22.9492	327	1129.17
22.9567	238	-1763.63
23.0108	79	-5467.9
23.0342	188	-2280.1
23.0383	100	-6022.97
23.04	134	-696
23.0558	133	-6166.2
23.0725	96	-245.667
23.0733	243	-641.833
23.075	170	-484.7
23.1075	73	-50362.7
23.1092	101	-889.633
23.1117	148	-1631.33
23.1258	327	-1392.07
23.1617	100	-5423.8
23.1675	188	-1382.63
23.1942	73	-36345.6
23.2283	238	-683.333
23.2842	79	-3830.97
23.29	99	-104.867
23.2942	73	-24641.9
23.2958	77	-1820.23
23.38	140	42
23.3967	133	-2255.73
23.4367	184	29.9
23.4625	169	17.3333
23.4958	188	-584.7
23.5208	160	-291.667
23.6717	250	-20
23.725	152	-94.8667
23.7467	60	62.8333
23.7475	73	9025.33
23.7542	194	40.2667
23.7567	242	28.5
23.7625	95	52.7667
23.7667	103	281.933
23.7725	179	64.6667
23.7975	81	137.867
23.8317	115	15
23.84	163	40.2
23.9092	224	33.4
23.9392	121	-49.5
23.9583	175	-86.1
23.9758	117	868.667
24.045	212	108.433
24.1542	230	74.5
24.185	205	211.733
24.1867	231	31.7667
24.2308	68	-604.133
24.2442	128	-598.1
24.2717	186	-717.6
24.3233	142	-3785.53
24.3383	79	984.667
24.35	192	143.733
24.3733	158	125.2
24.3833	73	5892.87
24.4108	149	348.967
24.4808	154	171.267
24.485	186	-840.4
24.5883	201	151.533
24.6083	168	64.1667
24.62	72	701.367
24.6933	157	-448.933
24.6942	247	18.6667
24.705	186	-1672.7
24.7125	229	79.5
24.7325	303	-50.7
24.7467	248	-27.9
24.825	406	-464.733
24.83	75	-53628.2
24.8308	147	-50067.8
24.8317	129	-9470.17
24.84	89	-4998.3
24.8458	407	-209.3
24.8508	291	-263
24.8658	322	125.033
24.8675	293	261.033
24.87	133	33468.6
24.8733	273	59916.2
24.8742	67	25852
24.8758	142	275.167
24.9083	343	66.8333
24.9225	89	5093.87
24.9467	65	-198.133
25.0133	207	-326.233
25.0158	257	25.1
25.0225	170	167.067
25.0658	78	31.1667
25.2142	130	113.767
25.2158	111	81.5
25.2367	166	-41.4
25.2583	136	25.8333
25.2692	60	179.9
25.2933	129	44.8333
25.3342	491	6.83333
25.4317	174	-27.9
25.465	145	106.167
25.625	79	-55.2667
25.7242	90	124.9
25.7525	149	1105.07
25.755	91	115.067
25.76	148	1180.8
25.7633	117	1819.17
25.7642	104	887.2
25.765	105	491.467
25.7658	103	9269.77
25.7667	218	1287.93
25.7675	75	3138.2
25.7692	89	1420.93
25.77	129	1848.07
25.7708	73	44833.6
25.7725	217	6233.6
25.7733	142	94.4667
25.775	147	5988.1
25.7775	135	244.233
25.7783	118	197.533
25.7858	66	193.633
25.7925	293	20.5333
25.7958	292	35.4
25.7983	114	202.367
25.8042	145	118.9
25.8083	127	77.9333
25.8125	93	11
25.8425	202	101.267
25.8442	306	111.333
25.8625	304	13.5
25.8633	245	20.1667
25.865	260	34.0333
25.96	426	7.16667
25.9825	105	1121
25.9883	143	891.4
25.9892	158	479.933
25.99	217	3708.1
25.9908	319	3373.63
25.9917	73	65010.6
26	131	2076.37
26.0008	89	3959.47
26.0017	75	13270.9
26.0033	207	677.933
26.005	74	5537.9
26.0092	103	5886.97
26.0108	129	4402.7
26.0133	133	4533.77
26.0142	157	2425.77
26.0167	217	1856.2
26.0175	149	1820.4
26.0183	163	441.767
26.0525	318	27.8333
26.0583	200	119.567
26.065	188	73.2667
26.0658	117	2700.93
26.0717	160	707.233
26.0725	133	1790.17
26.0733	103	3248.83
26.0742	319	714.033
26.075	149	720.767
26.0758	73	29760.5
26.0767	72	679.167
26.0808	157	1008.77
26.0892	129	3371.17
26.115	193	32.3333
26.3083	159	675.333
26.34	78	773.4
26.4092	96	102.667
26.4408	82	387.467
26.5392	141	865.067
26.5433	295	33.5
26.5525	147	94552
26.7567	115	474.3
26.8083	133	-2260.8
26.8567	101	729.733
26.8617	119	272.133
26.8658	218	140.633
26.9225	73	17412.1
26.9433	288	1.66667
27.0633	135	291.867
27.0692	90	149.967
27.0725	99	335.7
27.075	71	617.8
27.0783	74	2512.87
27.0933	89	1744.27
27.0942	133	2493.7
27.095	73	30667.6
27.0967	175	41.8333
27.1375	432	41.6
27.1708	61	415.2
27.2592	129	281
27.3342	77	-113.333
27.3825	72	-53.2
27.5092	60	56.7667
27.5458	207	-38.2333
27.63	78	106.6
27.6975	66	52.5
27.715	64	-40.2667
27.73	63	-24.6
27.805	305	25.6
27.8058	159	94.8
27.82	67	49.2
27.8283	75	-560.2
27.84	96	37.5667
27.8433	117	191.167
27.8467	104	28.6333
27.85	334	49.3
27.8558	102	61.4333
27.8567	292	130.567
27.8575	293	36.6333
27.8592	74	927.567
27.86	73	11148.2
27.8608	305	134.633
27.8617	204	142.7
27.8658	217	1284.4
27.8708	77	88.4333
27.8717	96	36.6667
27.8725	68	34.1333
27.8825	134	47.6667
27.89	133	328.333
27.8908	78	-154.3
27.8917	115	102.267
27.8925	155	21.9
27.9167	285	21.6
27.9342	69	149.533
27.9383	335	16.1
27.9592	357	18.5
27.9675	327	33
28.0392	78	35.5
28.0475	231	35.0667
28.1433	147	-187.8
28.1475	305	29.0667
28.1517	66	-67.2
28.165	217	81.7
28.1892	60	37.2
28.2483	305	4.83333
28.3075	220	62
28.3767	311	20.4
28.3908	74	74.7333
28.4008	116	80.3333
28.4033	77	92.4
28.4333	207	18.5667
28.4375	218	43.5
28.4425	217	111.067
28.4475	135	16.8333
28.4783	145	19.5
28.4933	131	119.533
28.5558	94	6
28.6233	403	13.3
28.6308	206	33
28.6517	148	-213.5
28.6758	337	26.4
28.7392	319	40.7
28.7817	218	66
28.815	73	2017.9
28.87	173	107.667
29.05	319	54.0333
29.0775	113	159.5
29.0817	192	57
29.0825	186	42.5333
29.0842	126	34.6
29.0858	88	85.2
29.0875	243	37.3333
29.0917	128	43.7333
29.0942	149	249.1
29.1	79	73.8667
29.1017	402	58.5333
29.1042	89	506.567
29.1067	96	66.5333
29.11	103	971.333
29.115	131	469.267
29.1208	202	751.833
29.1217	173	487.2
29.1225	116	408.533
29.1233	130	321.167
29.1275	144	114.167
29.135	129	1994.13
29.1408	87	1975.83
29.1433	105	86.6667
29.195	535	33.5667
29.2025	207	394.5
29.2233	108	23.4667
29.2375	88	89.6667
29.2708	79	435.733
29.2958	360	29.8333
29.3042	91	161.767
29.3092	590	8.66667
29.315	124	24.1333
29.3725	422	21.2667
29.375	318	51.4667
29.4058	132	-39.1
29.4117	85	62.9
29.4367	207	210.4
29.4683	322	20.9667
29.4825	203	160.367
29.485	243	160.733
29.49	83	159.6
29.4983	187	32.9667
29.5075	213	35.1667
29.5108	214	43.5
29.515	77	59.3
29.5158	74	326.833
29.5208	75	889.033
29.5217	127	33.5
29.5258	208	10.5667
29.5383	144	143.7
29.5442	186	23.3333
29.5783	333	63.9
29.5808	189	56.5667
29.6025	131	-41.2
29.6375	193	4.93333
29.6408	285	72.3333
29.8483	136	18.8333
29.8492	75	1406
29.8833	64	43.5
29.89	140	15.0333
29.8925	72	444.467
29.9	74	4083.87
29.915	172	119.7
29.9158	229	299.767
29.9175	103	3594.13
29.9183	205	2346.4
29.92	262	450.9
29.925	129	1873.6
29.9258	148	787.8
29.9267	131	446.133
29.9275	256	14.4667
29.9583	88	52.4667
29.9642	61	256.8
29.97	190	164.267
29.9833	135	187.7
29.985	119	354.733
29.9867	87	261.833
29.9925	162	17.6667
29.9933	133	2733.67
29.995	103	7448.77
29.9992	205	3417.9
30.0008	147	8113.17
30.0017	73	42593.1
30.0025	159	142.533
30.0033	74	3648.93
30.0042	157	1949.4
30.005	207	460.533
30.0067	173	310.967
30.01	245	29.6333
30.0117	148	1328.33
30.0125	204	579.5
30.0133	131	836.967
30.0175	231	159.767
30.0192	130	392.867
30.02	217	1726.3
30.0217	118	255.933
30.0292	170	42.2333
30.03	319	3171.43
30.0317	331	20.3
30.0342	174	107.2
30.0375	206	631.567
30.0508	73	-3102.5
30.0642	125	22.7
30.0658	175	130.5
30.0717	303	20.9
30.0858	278	36.5667
30.1308	204	33.3333
30.145	172	523.133
30.1733	73	6811.7
30.1792	63	-23.9
30.1883	370	49.2667
30.3242	540	11.3333
30.4183	63	-31.9
30.4992	208	28.5333
30.5325	117	22.8667
30.61	78	22.5667
30.7008	64	44.6333
30.765	203	17.8333
30.8325	142	34.6667
30.8392	249	8.5
30.8967	75	224.533
30.9417	77	75.8667
30.95	149	34.8333
31.0383	111	32.8333
31.1158	265	95.7
31.1183	357	130.233
31.1192	431	125.5
31.125	74	1000.33
31.1258	73	10212.4
31.1275	222	165.1
31.1283	149	211.867
31.1567	192	59.8333
31.1592	217	407.7
31.1783	310	13.6
31.1992	319	109.833
31.2258	204	48.8
31.2625	297	29.3333
31.2875	78	31.7
31.3125	70	19.8333
31.4042	193	21
31.4475	422	6
31.515	111	14.4
31.5333	73	506.867
31.5617	147	564.233
31.6108	409	7
31.7908	147	877.1
31.8183	85	57.4
31.825	73	-1553.6
32.015	89	94.9
32.065	88	13.8333
32.2083	297	44.1
32.2183	267	58.1667
32.2192	222	183.533
32.2208	74	317.5
32.2217	149	130.167
32.2225	221	790.3
32.2233	369	108.8
32.2242	73	4904.7
32.2267	147	983.1
32.2275	370	40.9
32.2292	66	110.3
32.2383	75	1218.2
32.3317	193	128.567
32.4033	281	20.5667
32.4142	84	97.2667
32.5517	191	44.2333
32.5558	133	63.3667
32.6292	111	29.6667
32.6325	149	52.3667
32.65	76	-56.6
32.7567	111	22.6667
32.92	66	-67.7
33.0167	355	323.067
33.0417	60	37.3333
33.1075	69	-24.1333
33.1767	73	865.333
33.1883	103	110.6
33.1958	116	25
33.2442	61	21.1667
33.4292	135	16.5
33.4483	204	21.1667
33.5117	135	31.1333
33.5217	79	53.2667
33.5325	241	35.9667
33.575	69	33.0333
33.6383	381	5.66667
33.7	70	-102.433
33.7192	129	-264.7
33.7492	113	-25.3
33.8767	115	20.1667
33.8917	75	-187.4
33.9342	149	64.2
33.9767	147	996.8
33.9842	156	16.5
34.0025	73	1679.4
34.0367	281	22.2
34.0408	60	-34.4
34.115	282	71
34.1183	283	43.2667
34.1192	223	123.233
34.125	207	387.1
34.1258	369	124.7
34.1275	221	956.833
34.1292	295	287.333
34.13	73	3894.77
34.1308	222	219.6
34.1333	281	283.433
34.1342	189	14.6
34.1367	74	286.667
34.1383	296	101.533
34.14	103	76.3667
34.1483	327	21.8667
34.1525	371	38.5
34.1533	265	40.1333
34.1967	73	634.167
34.23	63	-20.9333
34.2408	150	17.3333
34.2967	101	-40.6667
34.3108	77	47.4
34.3875	115	-40.2
34.4092	183	-34.6
34.4108	587	-12
34.415	99	-26.6
34.4417	173	-17.1667
34.4783	78	-28.4667
34.5625	77	56.8
34.5758	76	38.4
34.6033	257	-23.6333
34.615	149	-97.4667
34.7467	96	47.3667
34.7708	193	-116.733
34.775	329	-25.1667
34.7858	77	98.8
34.7958	381	-16.3
34.8183	177	33.5333
34.8192	75	684.2
34.8267	76	61.6667
34.8333	85	62.6667
34.8508	61	-58.5
34.885	77	-62.4
34.8925	63	-27.7
34.8975	103	124.633
34.9525	72	56.3333
34.9625	137	15.5667
34.9867	217	-43
34.9967	76	37.3
35.0108	147	1351.7
35.02	131	101.467
35.0675	67	-37.8
35.0742	207	-36.4
35.12	75	-941.833
35.2308	117	-69.8333
35.2317	208	27.2667
35.2483	64	63.2667
35.325	133	30.4667
35.3283	85	11.9333
35.4058	89	48.9
35.4183	74	224.667
35.4258	131	116.367
35.4442	72	49.7333
35.5042	147	664.4
35.5433	66	167.367
35.6158	129	-23.5
35.6283	70	-260.467
35.6308	149	-918.3
35.6333	150	-85.9
35.6708	149	574.867
35.6733	167	155.533
35.6767	150	65.6667
35.6975	75	126.667
35.745	101	-158.833
35.755	203	-132.6
35.8	64	64.3
35.8608	129	68
35.8758	64	52.3333
35.885	283	50.8
35.8992	209	-35.9
35.9033	369	143.867
35.9042	101	32.9333
35.905	115	32.7
35.9083	281	261.5
35.91	73	3866.3
35.9108	295	314.7
35.9117	147	1615.7
35.9125	207	426.933
35.9133	221	1086.1
35.92	296	105.133
35.9217	133	161.467
35.9617	282	35.1333
35.9717	78	24.2667
35.9875	265	35.5
36.1883	165	-71.0667
36.3608	77	53.1
36.4925	205	112.933
36.4933	119	58
36.4983	148	414.167
36.5042	133	397.033
36.5075	156	13.9333
36.6733	76	44.8333
36.6967	133	68.3667
36.7358	149	69.1
36.7692	131	252.367
36.7808	70	-39.2
36.8058	105	39.0667
36.86	85	-25.2
36.8867	133	76.6667
36.9708	64	-40.9333
37.015	193	14.5
37.26	207	43.5333
37.3392	149	150.333
37.4125	78	37.2667
37.5708	281	233.133
37.595	369	118.867
37.6158	222	181.3
37.6225	223	96.7333
37.6267	117	574.267
37.7858	61	30.3333
37.8333	148	225.6
37.8408	149	183.667
37.8467	72	42.7667
37.9008	75	83.3333
38.0925	209	103.6
38.0958	193	176.367
38.1075	131	-834.4
38.11	148	-532.533
38.1167	296	64.8667
38.1342	85	-420.367
38.1408	163	-175.267
38.17	96	36.5
38.4158	133	27.8333
38.4792	147	1606.8
38.4808	64	48.4
38.5425	153	-282.267
38.5992	95	191.833
38.6817	132	-79.7333
38.6958	101	152.2
38.78	173	-45.1
39.005	73	3132.13
39.0242	74	86.3333
39.0558	221	19.6333
39.0717	100	-36
39.0833	221	151.533
39.0967	208	19.6
39.1367	87	108.233
39.1592	284	12.5
39.1742	297	28.6
39.1767	73	1614.87
39.1817	147	1284.6
39.2008	148	149.867
39.2292	290	9.33333
39.2367	222	33.7333
39.25	115	10.5667
39.2775	71	21.0667
39.3242	325	-242
39.3308	147	1366.9
39.3333	66	238.7
39.3442	165	-18.4
39.3458	87	58.0333
39.3917	149	82.3333
39.3958	148	215.6
39.4008	267	-14.5
39.495	85	10.4333
39.62	147	1238.9
39.6258	251	31.3667
39.6442	133	104.067
39.7083	209	-29.4333
39.7183	131	89.4333
39.7267	64	80.5333
39.7275	66	217.3
39.7408	83	-38.1333
39.7692	75	-155.1
39.7742	111	14
39.7867	131	121.367
39.7992	147	1177.4
39.8042	66	313.733
39.8217	148	237.333
39.8317	149	120.833
39.8508	133	49.3
39.8692	74	107.9
39.9258	281	25.2
40.205	281	55.2667
40.2525	217	-94.9667
40.2717	66	121.533
40.2858	148	209.933
40.2925	87	60.6333
40.2983	249	12.6667
40.325	66	225.067
40.365	249	11.8333
40.3858	87	104.133
40.4142	119	19
40.4217	148	326.933
40.4233	149	158.967
40.43	66	421.033
40.435	72	85.7667
40.4475	67	41.3333
40.4733	131	143.667
40.4742	147	1698.7
40.53	61	63.5
40.5492	73	892.3
40.5917	78	22.4667
40.6283	74	117.067
40.6742	104	20.8333
40.7117	68	39.8333
40.7125	73	1222.27
40.7717	74	78.3333
40.8708	73	257.833
40.885	123	-13.5
40.9083	133	-433.633
40.9325	79	-35.6
40.9358	134	-68.4667
40.9417	105	-106.133
40.9725	209	70.4
41.0317	147	1121.2
41.0458	88	10.8333
41.0575	66	196.567
41.205	63	-36.0667
41.2775	131	33.7
41.28	87	31
41.32	137	-20.4333
41.3267	76	30
41.3775	149	80.7333
41.3858	61	43.8
41.4958	61	-48.2
41.5283	60	-27.2
41.6442	147	735.9
41.7175	65	19.2
41.7258	191	21
41.8775	61	40.5667
41.9408	147	1390.93
41.9433	66	218.267
41.9458	283	-16.5
41.9642	78	44.8
41.9658	132	19.7667
42.0017	79	58.3
42.05	117	20.6667
42.1083	148	130.833
42.1092	64	144.1
42.1242	147	1266.57
42.1658	66	125.367
42.2917	221	-203.733
42.3225	72	25.6
42.3908	119	26.5333
42.4117	281	31.3667
42.4208	115	13.4
42.4817	103	-25.2
42.5042	81	-28.9
42.57	209	-17.5
42.575	193	63.8667
42.6575	224	12.3333
42.6592	148	141.733
42.7267	61	52.8667
42.7417	149	100.167
42.7675	96	43.8667
42.7958	223	-19
42.8067	103	-142.567
42.82	73	769.6
42.8208	78	29.1333
42.845	66	146.4
42.8558	72	42.8333
42.89	148	87.4333
42.9292	148	146.267
42.9325	133	79.4667
42.9442	147	878.233
42.9675	74	30.9667
42.9783	281	36.1333
43.0325	87	37.6667
43.0342	73	308.233
43.0775	78	33.0333
43.2633	165	-17.4667
43.2808	195	4.23333
43.3108	66	148.067
43.3517	209	36.3
43.4308	137	-32.5
43.4908	282	27.5
43.5183	222	29.9
43.535	96	20.3333
43.5492	76	51.6
43.5725	74	64.5
43.6158	131	99.1333
43.6458	146	9.6
43.6483	136	17.6333
43.6592	148	149.333
43.6633	63	-38.7
43.6675	74	142.7
43.6692	117	49.0333
43.6708	147	830.267
43.6983	119	28.9333
43.7067	64	162.233
43.7083	81	-28.7333
43.7483	207	90.9
43.8958	223	-24
43.9508	100	-30.1
43.9717	133	-39.2
44.0058	71	36.5
44.0267	74	40
44.0775	77	-58.1
44.0942	96	-31.7
44.115	281	31.9667
44.215	148	49.2
44.2242	147	381.367
44.2975	115	26.6667
44.325	74	36.6667
44.3275	147	610.367
44.4317	76	-28.3333
44.44	81	-36.5
44.4825	193	72.1333
44.6108	96	71.4
44.6417	77	-129.5
44.6533	71	22
44.8608	283	-19.3
44.9658	209	22.5333

## Sheet: EE2 D5
All Metabolites				Increased Metabolites					Decreased Metabolites
RT (min)	Mass	EE2 - CTL		RT (min)	Mass	EE2 - CTL	Metabolites		RT (min)	Mass	EE2 - CTL	Metabolites
8	147	135849		8	147	135849			9.10583	75	-11880.1	acetic acid, 2 TMS
8.00083	98	1766.11		8.02167	156	7013.84			9.77167	75	-43744.7
8.0125	136	47.8		8.0225	155	48914.4			9.97833	117	-8613.89
8.02167	156	7013.84		8.055	117	59590.1			9.98083	75	-23615.8
8.0225	155	48914.4		8.05667	89	8938.96			10.3842	79	-34096.4
8.02583	303	819.533		8.06833	61	36847			10.6825	67	-5256.93
8.05333	119	2133.11		8.2325	117	18270.2			11.71	147	-154771	sulfate, 2 TMS
8.055	117	59590.1		8.5175	207	6038.53	carbamate		12.0142	147	-48864.4
8.05667	89	8938.96		9.58083	133	10397			12.1558	75	-7918.24
8.065	143	2850.33		9.58167	221	39653.3			12.6492	149	-283794	2-Butenoic acid, 2 TMS
8.06833	61	36847		9.6025	73	98226.2			12.65	148	-305230
8.0825	145	1742.6		10.2358	157	9271.22			12.87	84	-7164.56
8.09167	96	527		10.2433	152	8700.84	L-alanine		13.1375	117	-9354.98
8.095	144	4288.47		10.2442	151	31380.3			14.0175	75	-290261
8.10667	171	3180.93		10.7108	148	18661			14.0317	106	-13553.1
8.12667	198	99.1333		10.73	76	8866.6			14.0325	105	-73486.9
8.13	149	-1685.16		10.7308	81	6545			14.0333	115	-147601
8.1425	262	-33.8889		10.7317	73	379971			14.035	135	-244272
8.19833	66	-4375		10.7375	104	15368.3			14.0358	133	-598271
8.20667	108	147.667		10.7408	103	51412.2	glycine, 2 TMS		14.0367	181	-139943
8.2325	117	18270.2		10.7417	176	16922.3			14.0375	193	-256724	glycerol, 3 TMS
8.23917	86	1568.58		10.7425	102	341887			14.0383	211	-453269
8.26167	102	527.467		10.7433	204	18469.3			14.0392	221	-23949.2
8.33167	162	726.822		10.7458	147	104635			14.04	269	-17468
8.35167	70	606.933		10.7467	87	10819.6			14.0408	313	-24225.4
8.36333	190	145.867		10.7633	117	7865.11			14.0417	268	-7368.82
8.37167	168	93		10.765	74	38099.8			14.0425	300	-396261
8.3875	76	-4606.73		10.7825	245	6183.16			14.0433	301	-231244
8.42083	258	11.2		11.0292	267	11006.2	Ethanedioic acid, 2 TMS		14.0525	283	-64293.2
8.43333	168	1074.47		11.03	355	5871.31			14.0542	302	-34504.5
8.45333	183	580.2		11.215	146	16308			14.055	285	-18034.4
8.45917	184	31.9333		11.2292	130	12206.4	butane, 2 TMS		14.0558	303	-12824.7
8.4625	126	661.511		11.2308	152	6667.64			14.0567	270	-9717.27
8.47667	162	-58		11.7892	64	5273.6			14.0575	299	-1.08484e+06
8.485	318	-296.6		11.805	227	5109.2			14.0592	284	-53318.1
8.5175	207	6038.53		12.2433	102	20238.8			14.06	317	-6230.33
8.545	151	81.2889		12.2767	73	35819.5	Ethanimidic acid, 2 TMS		14.0608	315	-59443.2
8.64583	121	1662		12.4525	147	37773			14.0642	314	-222148
8.71667	198	22.3556		12.5708	77	39632.8			14.1	79	-7785.69
8.72417	125	30.4		12.5975	174	12117.1	Acetoacetic acid, 2 TMS		14.2067	84	-6267.31
8.79167	286	49.7111		12.6	100	24795			14.2117	72	-12466.4
8.79333	184	60.0889		12.7883	115	16291.5	L-Valine, 2 TMS		14.2142	82	-9379.22	L-isoleucine
8.79583	186	2282.4		12.7892	117	20751.8			14.215	70	-7211.56
8.84167	345	4.8		13.6225	147	32976.2	Mercaptoacetic acid, 2 TMS		14.455	300	-12827.7
8.8425	298	35.6222		13.745	191	15785.5			17.6025	61	-7030.36
8.84417	336	14.1111		13.7533	147	107398			17.6775	72	-5356.67
8.84667	354	8.6		13.7542	173	8580.18	Urea, 2 TMS		17.7367	70	-13492.6
8.8475	342	7.8		13.7575	171	38808.1			17.9433	129	-9929.89
8.84833	284	43.7556		13.7708	77	8302.96			18.0667	130	-10005.8
8.85167	240	43.8667		14.1258	190	7175.47			18.0908	254	-431138
8.85333	306	32		14.3325	301	10527.8	silanol		18.0917	255	-87543
8.8575	295	48.8		14.3442	73	40372			18.0958	135	-5431.13
8.91167	108	240.267		14.68	130	10101.8			18.1067	75	-325646
8.9125	137	766.911		14.6867	211	8076.87			18.1075	105	-21496.2
8.92417	65	1303.91		14.7142	83	8764.44			18.1083	104	-47335.1
8.93	138	246.889		14.7892	299	39902.2			18.2375	72	-76151.2
8.98083	193	-75.8889		14.9708	86	29636.2			18.4508	133	-10240.7
9.00583	172	130.4		14.9717	248	33929.1			18.74	64	-19625.3
9.01917	163	62.7111		14.9725	148	217738			19.3525	72	-91013.4	2-Piperidinecarboxylic acid (l-pipercolate)
9.02583	229	24.9778		14.9733	147	1.21776e+06			19.6025	98	-6780.22
9.06417	176	461.956		14.975	131	34489			20.02	75	-109073	Methylmalonic monoamide, 2 TMS
9.07667	95	-1108		14.9758	133	59544.7	Butanedioic acid, 2 TMS		20.4342	157	-10364.9	Pentanedioic acid
9.07917	110	-114.667		14.9767	101	17460.5			20.8892	158	-13187.8
9.08833	184	16.4		14.9775	117	31021.6			21.5008	221	-12055.7
9.10583	75	-11880.1		14.9783	105	7873			21.5025	147	-22650.9
9.13333	219	7		14.9825	135	6248.27			21.5958	200	-5872.47
9.1725	157	-612.533		15.4567	101	13832.1			21.7917	72	-14150.1	Silanamine
9.20667	179	50.6444		15.4575	100	37385.8	Pyrimidine, 2 TMS		21.85	74	-54621.8
9.22083	127	73.4889		15.4583	99	154819			21.8525	147	-85095.4
9.335	128	-161.978		15.7858	87	5899.8			21.9217	73	-239872	Propanoic acid
9.3375	235	12.4		15.7883	117	11111.9		-11880.1	22.2392	66	-56881.6
9.3425	127	-1893.11		15.79	66	23433.2			22.2425	75	-320343
9.345	94	-124.222		15.7917	77	15723.2			22.2442	70	-82991.2
9.375	154	702.956		15.7925	246	64843.5	2-Butenedioic acid (Citraconic acid)		22.2592	133	-785574
9.38083	127	1329.93		15.7933	147	257670			22.26	85	-61028.2
9.38917	155	1200.16		15.7942	73	445309			22.2683	191	-13705.2
9.39417	176	-187.022		15.795	103	9686.11			22.3192	328	-206167
9.39917	146	-649.556		15.7958	71	9766.18			24.1233	73	-26380.9
9.40083	234	-260.089		15.8025	116	6246			24.3225	75	-15374.4
9.42917	152	1170.4		17.2433	77	5069.27			16.1183	102	-1509.22	L-serine
9.45583	109	103.244		17.82	72	5818.6
9.56667	220	34.1333		17.9508	64	38311.6
9.57167	194	84.1778		18.1467	254	412617	Cycloheptasiloxane
9.57833	175	285.267		18.4267	299	6938.91
9.57917	96	578.956		18.4458	100	112347
9.58083	133	10397		18.525	102	30208
9.58167	221	39653.3		18.5717	218	13423.6
9.5825	119	1818.56		18.7933	105	7037.58	Butanedioic acid, 3 TMS
9.58333	81	585.644		18.8883	64	20394.8
9.58417	163	425.422		19.1475	84	8032.98
9.585	208	166.4		19.2317	68	8580.93
9.58667	253	56.6444		19.325	306	7134.02	L-Proline, 2 TMS
9.59417	160	51.5333		19.3383	203	6184.76
9.6025	73	98226.2		19.3642	189	7092.47
9.61917	76	1134.42		19.365	188	26105.4	L-aspartic acid, 2 TMS???
9.625	172	9.6		19.3733	72	53711.8
9.65	81	-891.978		19.5317	232	10264.6	butanoic cid, 2 TMS
9.6525	200	-208.422		19.7467	156	13645.5
9.67583	97	-68.7778		20.2625	232	8636.33
9.68	273	85.2667		20.3075	84	39600.1	Pentanedioic acid
9.68083	144	135.711		20.4767	232	9221.18
9.68583	100	1962.78		20.6167	73	131426
9.68667	192	1263.18		20.6492	73	137477
9.68833	143	236.533		20.9292	71	8099.84
9.69	69	1325.09		20.9525	60	11883.2
9.69333	193	201.533		20.9567	115	41050.7
9.69667	104	613.244		20.9858	73	866647
9.6975	93	127.422		20.9867	131	10332.9
9.69833	194	94.0667		21.0225	133	18888.7
9.70417	114	74.9778		21.0425	70	89961.2
9.70667	188	345.933		21.1267	235	8323.71
9.70833	177	390.133		21.1467	101	42921.4
9.72333	170	542.711		21.1475	89	7770.76
9.73583	131	1256.4		21.1483	99	38409.6
9.73917	180	200.622		21.1517	100	291795
9.75167	98	-129.8		21.1567	191	12876.2	L-aspartic acid, 3 TMS
9.77083	85	-1956.89		21.1575	174	70326.8
9.77167	75	-43744.7		21.16	142	113357
9.78333	186	2		21.1667	147	505605
9.85	150	-63		21.1675	114	66586.4
9.86417	87	374.8		21.1683	73	1.92437e+06
9.90667	166	-533.733		21.1733	134	21047.3
9.91167	169	226.956		21.1767	87	15859.3
9.92583	88	40.6		21.2067	113	9333.64
9.92667	63	285.378		21.2275	158	29782.7
9.93	126	158.4		21.3383	192	37498.6	glutamic acid, 3 TMS
9.93417	205	157.733		21.3683	142	7612.4
9.94083	123	130.356		21.37	70	32207.4
9.95167	153	156.467		21.4425	71	5120.91
9.965	175	26.5111		21.4542	77	17770.2
9.9725	111	43		21.5692	200	5591.62
9.97833	117	-8613.89		21.7842	116	15636.1	Silanamine
9.98083	75	-23615.8		21.7883	299	11266.4
10.0542	94	-467.778		22.1767	146	24277.9
10.0958	152	-74.8222		22.2083	187	6146.67	Taurine, 3 TMS
10.1142	100	-2706.02		22.6083	98	6175.89
10.12	176	-85.0667		22.6333	326	60039.2
10.125	86	-2526.91		22.6742	328	13580.8
10.145	82	-244.222		22.71	147	80442.6
10.1525	61	-4119.67		22.7142	175	6836.47
10.1967	199	-355.422		22.76	66	7030.6
10.2225	84	-1321.44		22.7925	326	61398.6
10.2233	110	-843.067		22.7967	156	5426.8
10.2358	157	9271.22		22.8025	116	9062.16
10.2425	153	2963.13		22.8308	188	21871.1
10.2433	152	8700.84		22.84	86	44071.4
10.2442	151	31380.3		22.8408	328	16283.5
10.2467	143	1382.47		22.8433	326	41405.2
10.255	223	31.5333		22.8842	87	5004.4
10.2675	156	249.8		22.97	131	10109.1
10.275	239	25.8		23.0975	72	8705.53
10.2858	317	37.1333		23.1242	116	6139.07
10.2875	289	72.5333		23.1267	148	7611.33
10.3133	157	-4747.24		23.1367	103	5432.76
10.3483	237	132.356		23.2042	172	8520.53
10.3825	154	-924.644		23.2083	74	9874.2
10.3842	79	-34096.4		23.2208	60	6398.96
10.405	279	47.9333		23.5283	147	24456.4
10.4183	359	36.9778		23.9558	147	14515.7
10.425	162	-232		23.9767	75	7814.53
10.4292	160	-281.111		24.1983	142	10963
10.43	129	-2423.33		24.3142	147	17268.6
10.4317	161	-846.689		24.6975	77	7225.09
10.455	151	-396.222		24.8333	177	6959.04
10.4658	162	154.778		24.8342	145	10157.4	DL-Ornithine, 4 TMS
10.4758	65	630.8		24.835	142	716009
10.4925	191	-307.556		24.8675	190	10592.9
10.5008	64	1927.47		24.875	111	10996.1	citruline
10.5058	87	1974		24.9058	217	40656.2
10.5125	220	97.8444		24.915	148	55623	1,2,3-Propanetricarboxylic acid
10.5133	81	703.578		25.2367	73	15716.1
10.5158	134	571.133		25.4175	73	47267.2
10.545	84	-3671.2		26.2267	71	6753.2	d-Glucose
10.5483	83	-935.356		26.2842	174	13339.4
10.55	67	-2621.2		26.65	179	7817.04
10.5792	84	3878.2		26.905	147	15848.4	L-Tyrosine
10.625	331	12.1111		26.9767	73	27958.3
10.635	378	-26.9556		28.3267	74	5574.36	Inositol, 6 TMS
10.6708	528	-39.5556		29.9	217	6584.16
10.6825	67	-5256.93		29.905	103	16550.4
10.7108	148	18661		29.9067	73	115495
10.7133	531	22.2		29.9083	157	5961.2
10.7258	144	249.8		29.91	75	10270.8	d-Galactose
10.73	76	8866.6		29.9125	205	10351
10.7308	81	6545		29.9133	147	21207.9
10.7317	73	379971		29.9158	133	5865.33
10.7325	83	411.422		29.9183	89	6563.76
10.7333	190	788.378		29.9467	117	7076.49
10.7358	191	264.2		29.99	89	6462.07
10.7367	162	155.022		29.9917	103	25139
10.7375	104	15368.3		29.9933	205	11897.7
10.7392	134	1408.16		29.995	117	9031.38
10.74	132	4909.96		29.9958	217	7425.69
10.7408	103	51412.2		29.9967	74	11823.8
10.7417	176	16922.3		29.9992	147	24254
10.7425	102	341887		30.0225	73	140813
10.7433	204	18469.3		30.0242	75	13480.6
10.745	88	4263.09		30.025	133	9138.29
10.7458	147	104635		36.0083	97	21933.8
10.7467	87	10819.6		36.0158	75	239067
10.7558	150	850.622		36.0183	70	16138.8
10.7575	244	429.733		36.0192	61	23963.3	Inosine, 4 TMS
10.7625	136	84.7111		36.0208	117	73485.6
10.7633	117	7865.11		36.0225	147	283536
10.7642	262	105.267		36.0242	87	14228
10.765	74	38099.8		36.0283	76	14834.6
10.7658	78	2637.6		36.0333	69	44997
10.77	108	195.956		36.0358	74	214437
10.7742	158	288.889		36.0383	73	2.09714e+06
10.7825	245	6183.16		36.0392	72	46819.9
10.7833	115	2078.62		36.04	99	29048.2
10.8392	114	300.467		36.0408	71	11664.4
10.8608	567	5		36.05	104	30839.2
10.9658	142	130.489		36.0508	111	37016.4
10.97	129	2903.16		36.0517	129	109226
10.9742	68	792.8		36.0525	217	316086
10.9783	126	130.2		36.0575	282	38622.4
10.985	186	65.4889		36.0733	134	19706.3
10.9875	157	333.578		36.0792	243	81245.5
10.9975	67	235.8		36.085	84	31849.1
11	81	420.067		36.0875	83	8160.6
11.0092	153	103.222		36.0883	259	119979
11.0167	63	513.733		36.0892	245	196703
11.0233	194	392.711		36.0908	219	35479.4
11.0258	154	751.6		36.0992	237	111942
11.0283	356	2196.69		36.1008	230	261621
11.0292	267	11006.2		16.285	130	2487.04	L-threonine
11.03	355	5871.31
11.0317	163	615.067
11.0325	193	2105.49
11.0333	96	400.4
11.0342	191	1931.09
11.0367	196	28.9556
11.0383	151	326.067
11.0392	90	282.289
11.04	157	108.822
11.0408	242	160.622
11.0417	273	96.8889
11.0458	122	80.4667
11.0508	138	10
11.0525	106	187.244
11.0542	103	4790.38
11.0592	97	105.622
11.06	121	358.867
11.0683	82	127.244
11.0692	143	256
11.0775	150	712.911
11.0792	195	225.444
11.08	139	103.956
11.0833	238	146.489
11.0933	110	92.9778
11.1008	207	701.244
11.1325	92	-717.622
11.1392	187	-250.133
11.1533	265	-20
11.1892	192	772.911
11.19	277	35
11.1933	141	697.622
11.195	139	201.644
11.2008	185	730.489
11.215	146	16308
11.2275	167	1701.02
11.2292	130	12206.4
11.2308	152	6667.64
11.25	124	93.2444
11.2658	154	159.756
11.2883	130	1973.91
11.29	142	1034.98
11.31	176	83.0667
11.33	132	156.556
11.3417	63	362.133
11.3608	242	10.2
11.3692	121	188.156
11.4117	72	-2055.67
11.4217	153	185.556
11.4858	143	467.511
11.5208	69	2114.2
11.5225	82	278.6
11.535	132	261.356
11.5433	172	207.6
11.5467	359	22.6
11.5533	193	-587.444
11.5567	130	-2452.87
11.605	316	28.2
11.6442	93	2451.42
11.6475	143	940.822
11.65	211	-208.822
11.6525	179	585.2
11.6533	67	1840.67
11.655	111	132.378
11.6583	180	84.9111
11.66	339	9.77778
11.7058	91	-522.933
11.7067	341	-32.6
11.71	147	-154771
11.7133	143	-1236.44
11.7333	510	2.4
11.775	117	-3549.93
11.7825	99	872.489
11.7892	64	5273.6
11.7958	159	552.733
11.805	227	5109.2
11.8083	160	159.244
11.8142	571	1.8
11.8975	297	-22.4
11.9042	391	-34.0444
11.93	176	-84.7333
11.98	126	-266.422
12.0142	147	-48864.4
12.0183	130	787.756
12.0192	231	288.067
12.0492	307	16.7556
12.0533	281	-278.022
12.0583	191	-420
12.1008	128	181.2
12.1558	75	-7918.24
12.1783	217	155.911
12.1867	80	178.867
12.2108	136	540.956
12.2125	210	1964.56
12.2208	86	2643
12.2217	225	361.067
12.225	82	775.178
12.2275	209	-22.3778
12.235	407	-22.6
12.2433	102	20238.8
12.2442	204	241.333
12.2542	116	979.6
12.26	188	274.667
12.2767	73	35819.5
12.2817	216	126.2
12.285	218	1574.53
12.305	146	1289.09
12.3575	82	1318.62
12.3583	102	2623.49
12.4	199	-31
12.4008	215	-157.644
12.4292	195	-553.756
12.4525	147	37773
12.4625	165	126.933
12.4658	171	111.533
12.4858	102	1920.69
12.5067	85	729.022
12.5708	77	39632.8
12.5825	292	84.0444
12.5967	176	2446.78
12.5975	174	12117.1
12.5992	180	2156.56
12.6	100	24795
12.6067	168	3772.4
12.6308	226	68.2
12.6317	152	4310.56
12.6492	149	-283794
12.65	148	-305230
12.6567	462	9
12.6667	242	-1110.29
12.7108	91	1462.93
12.7125	217	1511.82
12.7883	115	16291.5
12.7892	117	20751.8
12.7958	350	9.6
12.8017	92	269.689
12.8058	474	5.6
12.8117	126	-1132.44
12.8133	179	-130.667
12.8242	282	-195.822
12.825	281	-712.756
12.8283	205	-72
12.8575	201	-397.911
12.87	84	-7164.56
12.8917	155	420.022
12.9183	193	-190.689
12.9233	282	-126.267
12.9275	281	-412.089
12.9475	100	744.2
12.9558	232	118.4
12.9667	227	4684.6
12.9683	84	583
12.9783	154	382.556
13.0275	75	-4050.93
13.0592	99	1829.69
13.1017	79	4037.31
13.1033	81	298.8
13.1083	261	30.9333
13.1375	117	-9354.98
13.1383	118	-1033.51
13.15	509	5.4
13.1517	129	616.6
13.1533	178	34.0222
13.1658	200	14.8
13.1708	182	14
13.1975	103	-1097.67
13.205	279	-67.6889
13.2342	159	638.444
13.2517	203	104.556
13.2525	91	78.7111
13.2583	89	-1714.98
13.2633	86	433.822
13.265	70	391.622
13.2792	71	-680.956
13.2875	159	-209.311
13.2967	160	-199.933
13.3258	119	282.2
13.3367	191	479.822
13.355	276	2
13.3575	68	220.2
13.3592	107	264.356
13.3875	148	4627.29
13.4058	246	143.2
13.4142	80	301.822
13.4342	115	1112.36
13.4425	130	1310.98
13.4467	173	725.089
13.4483	114	254.711
13.4508	70	1457.36
13.455	261	58.8667
13.4558	157	225.889
13.4617	291	41.6222
13.4633	137	544.778
13.4658	93	387.2
13.4667	231	-649.578
13.475	306	3.6
13.4758	91	569.289
13.49	120	499.556
13.4992	231	950.4
13.5217	130	52.9111
13.5292	126	272.422
13.5592	100	-567.2
13.5642	110	137.467
13.565	103	1714.98
13.5667	100	896
13.5733	70	655.689
13.58	309	6
13.5833	117	740.4
13.5892	148	3915.4
13.5983	159	166.667
13.6167	120	364.489
13.6175	206	-278.667
13.6183	146	-435.578
13.62	369	-35.5778
13.6225	147	32976.2
13.645	333	6.6
13.6592	116	2256.02
13.66	194	-392.778
13.6658	189	1231.4
13.6717	243	454.289
13.6875	69	699.244
13.6883	125	48.0889
13.7017	93	422.378
13.7083	180	161
13.7217	144	388.956
13.7283	157	2686.36
13.73	81	484.111
13.7333	118	576.133
13.735	122	458.2
13.74	150	1653.8
13.7408	219	52.4444
13.7417	193	1179.91
13.745	191	15785.5
13.7467	217	854.8
13.7533	147	107398
13.7542	173	8580.18
13.7558	68	1766.33
13.7575	171	38808.1
13.7658	104	929
13.7708	77	8302.96
13.785	308	-42.1778
13.795	188	257.644
13.81	124	74
13.85	222	135.622
13.8517	221	575
13.8592	293	24.3556
13.8692	265	118.689
13.8725	106	212.622
13.8858	141	255.778
13.8867	67	542.578
13.8875	76	1060.96
13.8917	129	1578.58
13.8975	81	441.578
13.9033	184	53.2667
13.905	215	112.667
13.9058	216	2180.29
13.9083	247	61
13.9225	63	230.8
13.9317	240	113.178
13.9675	224	39.3556
14.0175	75	-290261
14.0317	106	-13553.1
14.0325	105	-73486.9
14.0333	115	-147601
14.035	135	-244272
14.0358	133	-598271
14.0367	181	-139943
14.0375	193	-256724
14.0383	211	-453269
14.0392	221	-23949.2
14.04	269	-17468
14.0408	313	-24225.4
14.0417	268	-7368.82
14.0425	300	-396261
14.0433	301	-231244
14.0508	272	-1476.89
14.0525	283	-64293.2
14.0542	302	-34504.5
14.055	285	-18034.4
14.0558	303	-12824.7
14.0567	270	-9717.27
14.0575	299	-1.08484e+06
14.0592	284	-53318.1
14.06	317	-6230.33
14.0608	315	-59443.2
14.0617	201	-3641.69
14.0625	309	-2351.56
14.0633	311	-1688.84
14.0642	314	-222148
14.0692	188	-1331.51
14.0708	235	-507.2
14.1	79	-7785.69
14.1258	190	7175.47
14.2067	84	-6267.31
14.2117	72	-12466.4
14.2133	98	-3913.76
14.2142	82	-9379.22
14.215	70	-7211.56
14.2967	71	-2347.44
14.3242	86	493.378
14.3325	301	10527.8
14.3408	314	3769.2
14.3442	73	40372
14.35	159	-386.733
14.3683	69	-2649.2
14.4275	84	-4205.91
14.455	300	-12827.7
14.4617	296	59.2889
14.465	295	178.8
14.4817	146	4061.51
14.4975	224	18.8
14.5017	138	-726.111
14.56	465	6.8
14.5633	62	2040.44
14.68	130	10101.8
14.6867	211	8076.87
14.6908	171	1212.62
14.6933	84	1033.4
14.7092	69	3159.8
14.7142	83	8764.44
14.7225	126	1983.67
14.7308	245	3226.8
14.745	397	57.9778
14.7733	171	-1228.53
14.7758	126	1020.8
14.7767	180	-4957.78
14.7892	299	39902.2
14.8067	429	-101.511
14.8092	341	-324.867
14.81	325	-146.133
14.8125	125	582.6
14.82	228	47.0889
14.8267	171	1096.16
14.8733	249	-97.5556
14.8775	190	277.022
14.9358	225	1383.6
14.96	192	1229.47
14.9708	86	29636.2
14.9717	248	33929.1
14.9725	148	217738
14.9733	147	1.21776e+06
14.975	131	34489
14.9758	133	59544.7
14.9767	101	17460.5
14.9775	117	31021.6
14.9783	105	7873
14.9825	135	6248.27
14.9842	212	1060.69
14.9958	227	285.089
15	430	18.2222
15.0017	316	429.911
15.0083	226	181.956
15.0092	313	42.0889
15.0175	288	21.6222
15.0392	118	2169.56
15.0758	289	34
15.1308	282	-472.267
15.145	146	95.8667
15.1692	106	-809.778
15.1992	85	813.356
15.2208	149	-1173.78
15.2317	314	2483.42
15.2575	225	421.978
15.2617	258	32.8
15.2783	82	-313.889
15.3258	284	57.2667
15.3275	267	-351.689
15.3433	357	-29.6
15.3708	353	5.2
15.3942	276	81.6667
15.395	114	-226.556
15.3983	191	1968.91
15.4058	260	202.756
15.4075	159	-120.044
15.415	245	130.4
15.425	246	-200.556
15.4275	77	-3855.22
15.4292	224	-166.044
15.4308	174	-2048.56
15.4392	228	101.711
15.445	272	11
15.4467	155	388.156
15.4483	142	1177.6
15.4492	223	41.6
15.4508	168	805.578
15.4525	129	1032.33
15.4542	171	792.689
15.4567	101	13832.1
15.4575	100	37385.8
15.4583	99	154819
15.4625	138	399.667
15.465	78	933.511
15.4683	313	29.9556
15.4692	143	522
15.47	116	2157.31
15.4708	160	365.622
15.4858	93	909.133
15.4925	303	21.9333
15.4967	300	4039.6
15.5008	135	1046.2
15.5025	81	179.778
15.5367	318	93.3333
15.5433	69	1067.09
15.555	88	196.978
15.5583	105	413.711
15.5758	245	13.8
15.6025	218	-292.578
15.6283	311	-35.4
15.6383	117	-845.467
15.64	133	-2847.22
15.73	106	404.867
15.7325	238	81.7111
15.7358	94	359.644
15.7383	108	1058.16
15.74	182	296.044
15.7408	124	339.111
15.7433	92	291.889
15.75	239	34.8
15.7575	137	167.733
15.7642	114	1874.8
15.7758	237	139.156
15.78	130	943.4
15.7825	102	2358.53
15.7858	87	5899.8
15.7875	64	3231.22
15.7883	117	11111.9
15.7892	105	4110.36
15.79	66	23433.2
15.7908	248	4257.16
15.7917	77	15723.2
15.7925	246	64843.5
15.7933	147	257670
15.7942	73	445309
15.795	103	9686.11
15.7958	71	9766.18
15.7967	132	4353.6
15.7975	101	3371.73
15.7983	216	634.267
15.7992	175	381.422
15.8025	116	6246
15.8042	100	4797.44
15.8058	229	293.267
15.8067	167	573.4
15.8075	193	1492.73
15.8083	65	1499.4
15.8092	218	3180.49
15.8225	95	884.667
15.8367	139	185.578
15.8483	105	373
15.8517	89	-1150.11
15.8525	332	-58.7778
15.8633	184	88.5333
15.8758	107	195.4
15.8783	153	221.089
15.9133	110	126
15.9267	81	458.511
15.9442	315	280.778
15.9533	256	150.178
15.9808	94	-122.289
16.0017	225	285.778
16.0342	102	3236.6
16.0492	255	45
16.0517	165	847.067
16.0608	193	488.6
16.0825	71	-361.156
16.1183	102	-1509.22
16.1267	159	163.911
16.1325	92	-45.4444
16.1875	84	827.289
16.1892	85	317.822
16.1933	116	612
16.1983	124	27.2
16.2008	142	120.6
16.2042	107	39.6889
16.2058	141	674.333
16.2117	111	46.5333
16.2317	82	390.867
16.2425	207	165.578
16.255	138	20
16.285	130	2487.04
16.2867	173	91.5333
16.2958	291	-87.2667
16.305	69	46.4
16.33	226	-31.2667
16.3417	70	796.756
16.4083	150	-102.2
16.4283	185	83.8889
16.4292	96	-81.6667
16.4483	300	591.711
16.4792	207	567.467
16.485	254	259.356
16.5	95	232.622
16.5667	185	129.844
16.5683	316	68.1333
16.5817	145	769.689
16.5867	182	595.289
16.5917	193	174.933
16.5925	136	-37.5778
16.6108	184	100.8
16.6242	183	1370.67
16.625	60	-644.778
16.6292	145	-660.689
16.68	170	229.489
16.7092	264	212.978
16.72	191	-3067.73
16.7217	192	-686.067
16.7233	141	-130.333
16.7242	219	297.267
16.7267	170	-476.956
16.7308	217	-98.8889
16.7333	177	-234.133
16.735	237	-47.6222
16.7375	295	-147.533
16.7383	282	-54.6667
16.7392	193	-516.822
16.74	310	-47.1556
16.7408	171	-242.867
16.7417	294	-339.978
16.7433	413	-106.022
16.7533	178	-80.9111
16.755	81	-138.667
16.7817	223	-401.889
16.795	219	-256.111
16.8175	173	242.978
16.8275	115	996.356
16.83	68	140.4
16.835	66	1262.8
16.8392	213	92.4
16.8442	144	545
16.845	219	400.289
16.8458	203	183.067
16.8575	161	1355.62
16.8617	76	970.8
16.8692	146	190.533
16.8825	66	1214
16.8833	160	1321.62
16.9142	215	71.9556
17.0225	193	897
17.0358	486	7.8
17.075	463	134.4
17.0917	398	18.4
17.135	300	1459.49
17.2433	77	5069.27
17.2492	97	89.0222
17.2617	254	47.2
17.2917	317	209.467
17.3075	64	3472
17.3108	79	205.4
17.3408	444	9
17.345	225	658.778
17.3508	191	499.933
17.355	316	199.667
17.3642	303	121.133
17.4483	314	2038.07
17.4725	207	783.644
17.4758	300	2711.89
17.4967	303	22.8667
17.505	259	222.044
17.5267	76	1948.8
17.5358	135	638.844
17.5525	258	843.756
17.5858	148	-3702.73
17.6025	61	-7030.36
17.625	193	601.178
17.6458	88	730.756
17.6725	130	-1594.64
17.6775	72	-5356.67
17.7017	60	3166.8
17.7033	111	-37.5111
17.7133	62	-121.689
17.7142	227	39.2
17.7367	70	-13492.6
17.7642	216	55.4222
17.82	72	5818.6
17.8258	218	209.622
17.85	382	-97.8667
17.9108	415	-198.689
17.9117	327	-597.267
17.9125	281	-538.089
17.9358	164	923.578
17.9433	129	-9929.89
17.9508	64	38311.6
17.9583	195	46.4
17.9633	235	-102.667
17.9925	170	-174.711
18.005	134	4087.6
18.01	135	2676.2
18.0142	300	762.578
18.0217	191	830.067
18.0267	83	2188.4
18.0275	315	106.956
18.0367	304	-1439.76
18.0633	119	4295
18.0667	130	-10005.8
18.07	93	2344.38
18.0908	254	-431138
18.0917	255	-87543
18.0958	135	-5431.13
18.1058	80	-3032.82
18.1067	75	-325646
18.1075	105	-21496.2
18.1083	104	-47335.1
18.1342	167	1495.8
18.1467	254	412617
18.1592	128	2970.2
18.2375	72	-76151.2
18.26	279	95.2889
18.3458	268	-1488.69
18.4267	299	6938.91
18.4425	129	3584.8
18.4458	100	112347
18.4508	133	-10240.7
18.4575	130	-2574.58
18.4617	81	-1871.2
18.485	226	156.156
18.525	102	30208
18.5717	218	13423.6
18.6333	107	959.089
18.6358	214	260.533
18.6425	327	405.422
18.74	64	-19625.3
18.7858	164	883.822
18.7933	105	7037.58
18.7992	122	-934.111
18.8058	154	991
18.8883	64	20394.8
18.8892	176	2473.51
18.895	338	15.3778
18.9158	128	-4999
18.9333	170	-152.089
18.9692	341	-36.4444
19.0883	94	-122.511
19.0933	81	-335.622
19.1475	84	8032.98
19.1908	185	149.6
19.2042	238	164.444
19.2083	264	93.4889
19.2125	314	267.333
19.2308	211	364.8
19.2317	68	8580.93
19.2333	237	-2522.82
19.235	222	-1311.87
19.2358	284	-246.711
19.2942	111	2869.13
19.3092	179	846.2
19.3217	292	3684.76
19.325	306	7134.02
19.3308	334	3682.04
19.3383	203	6184.76
19.3525	72	-91013.4
19.3642	189	7092.47
19.365	188	26105.4
19.3733	72	53711.8
19.3792	65	-1945.56
19.3875	304	164.889
19.39	281	-221.778
19.4475	190	153.667
19.4483	216	1032.09
19.465	130	1219.49
19.4958	335	52.1556
19.5025	435	11.6
19.5217	95	-306.444
19.5317	232	10264.6
19.5417	337	8.8
19.6025	98	-6780.22
19.6033	85	-868.578
19.615	190	-766.556
19.6575	190	-428.4
19.7117	61	-2967.04
19.7467	156	13645.5
19.8683	225	35.6
19.87	205	-194
19.8767	201	-215.933
19.8908	202	-542.422
19.9008	172	-1672.69
19.9667	71	3269.62
20.02	75	-109073
20.0325	77	1860.98
20.0358	157	-2741.02
20.045	67	-752.578
20.0833	110	71.4444
20.0875	160	-3201.11
20.1117	258	763.8
20.1433	106	81.8
20.1467	300	1042.4
20.1592	290	21
20.1825	109	36
20.195	101	939.222
20.2167	246	1420.82
20.2275	261	971.467
20.2292	314	312.089
20.2383	101	956.6
20.255	71	2563.24
20.2575	110	572.022
20.2625	232	8636.33
20.2742	227	30
20.3058	146	406.4
20.3075	84	39600.1
20.31	230	2428.78
20.3192	85	3656
20.3517	170	472.467
20.355	246	1964.02
20.4108	258	1327.73
20.4342	157	-10364.9
20.4767	232	9221.18
20.4825	260	1014.44
20.5217	150	-150.111
20.5275	132	-926.778
20.53	144	-3028.22
20.5317	259	2650.27
20.5625	243	220.222
20.5708	185	1
20.5875	234	849.8
20.6	193	25.8
20.6167	73	131426
20.6492	73	137477
20.6558	76	3835.2
20.6592	60	1256.49
20.66	190	250.4
20.6658	171	711.711
20.6783	307	228.178
20.6817	332	64.4
20.6825	101	2987.47
20.6867	66	2140.47
20.6967	142	3412.22
20.7258	66	2589.47
20.7758	212	543.156
20.785	65	510.711
20.8017	306	-338.889
20.8425	218	512
20.8492	107	688.156
20.8775	163	-2161.22
20.8883	475	-139.778
20.8892	158	-13187.8
20.9158	171	-1037.11
20.9292	71	8099.84
20.9508	190	4850.04
20.9525	60	11883.2
20.9567	115	41050.7
20.9858	73	866647
20.9867	131	10332.9
20.9983	355	-275.244
21.005	186	-1749.56
21.0067	124	665.533
21.0225	133	18888.7
21.0375	213	374.489
21.0425	70	89961.2
21.1267	235	8323.71
21.1375	382	38.8
21.1383	224	273.644
21.1467	101	42921.4
21.1475	89	7770.76
21.1483	99	38409.6
21.1517	100	291795
21.1567	191	12876.2
21.1575	174	70326.8
21.16	142	113357
21.1667	147	505605
21.1675	114	66586.4
21.1683	73	1.92437e+06
21.1733	134	21047.3
21.175	136	1486.27
21.1767	87	15859.3
21.1783	91	4406.16
21.1967	152	2186.11
21.1992	63	1757.11
21.2067	113	9333.64
21.2075	209	821.689
21.2092	212	1263.56
21.2275	158	29782.7
21.2333	366	467.289
21.24	208	1097.27
21.2808	298	-229.667
21.3025	257	614.311
21.3067	197	689.4
21.3192	183	3423.31
21.32	283	1102.71
21.3217	225	894.8
21.325	79	1591.29
21.3267	361	728.8
21.3308	243	1409.93
21.3325	107	1588.24
21.3333	263	341.911
21.3342	194	2372.27
21.3383	192	37498.6
21.3392	78	3261.27
21.3617	69	3924.47
21.3683	142	7612.4
21.37	70	32207.4
21.3717	67	3335.31
21.3833	191	-373.556
21.3892	94	214.2
21.3917	165	265.622
21.41	182	234.733
21.4125	175	1022.29
21.4425	71	5120.91
21.4533	89	824.822
21.4542	77	17770.2
21.465	200	-1157.69
21.4708	329	1037.47
21.4717	223	2923.44
21.4742	437	10.8
21.49	89	-1031.89
21.4917	247	-797.333
21.4925	192	-569
21.4975	329	-919.4
21.4992	223	-2887.91
21.5008	221	-12055.7
21.5025	147	-22650.9
21.5033	191	-1301.47
21.5208	140	1549.87
21.5508	211	1084.27
21.5683	201	1208.87
21.5692	200	5591.62
21.5825	219	1430.51
21.5883	114	-2001.11
21.5933	315	4985
21.5958	200	-5872.47
21.6208	172	-2078.6
21.6375	202	-405.556
21.6658	238	-22.3778
21.6725	296	217.422
21.6942	156	-1119.6
21.7042	112	-915.733
21.7358	316	-366.2
21.7842	116	15636.1
21.7883	299	11266.4
21.7917	72	-14150.1
21.8117	348	19.2
21.8417	314	86.3111
21.85	74	-54621.8
21.8525	147	-85095.4
21.9092	160	-146
21.9217	73	-239872
22.0925	155	752.289
22.1767	146	24277.9
22.2083	187	6146.67
22.2392	66	-56881.6
22.2425	75	-320343
22.2442	70	-82991.2
22.2575	107	-3676.58
22.2592	133	-785574
22.26	85	-61028.2
22.2683	191	-13705.2
22.3192	328	-206167
22.3642	310	-281.556
22.5667	190	2295
22.6083	98	6175.89
22.6108	226	2034.6
22.6333	326	60039.2
22.6742	328	13580.8
22.6792	204	785.844
22.7008	143	416.867
22.7033	248	3654.47
22.71	147	80442.6
22.7142	175	6836.47
22.7475	165	556.133
22.7542	184	139.289
22.76	66	7030.6
22.7733	141	240.2
22.7767	142	1225.69
22.7908	248	2668.31
22.7925	326	61398.6
22.7933	81	902.089
22.7967	156	5426.8
22.8025	116	9062.16
22.8042	163	51
22.8075	151	792.733
22.8108	82	2301.13
22.8308	188	21871.1
22.84	86	44071.4
22.8408	328	16283.5
22.8433	326	41405.2
22.8658	87	-2682.11
22.8842	87	5004.4
22.9658	132	3042.4
22.97	131	10109.1
22.975	248	2497.44
22.9875	140	887.133
22.9942	119	2513.96
22.9992	135	2224.44
23.0508	187	519.956
23.0575	180	363.378
23.0975	72	8705.53
23.1125	146	1711.91
23.115	134	3984.27
23.1217	173	1385.96
23.1242	116	6139.07
23.1267	148	7611.33
23.1367	103	5432.76
23.1425	117	4093
23.1892	134	2903.84
23.2025	66	3094.96
23.2042	172	8520.53
23.2083	74	9874.2
23.2208	60	6398.96
23.2567	332	73
23.2975	122	139.4
23.31	333	30.7556
23.3342	76	234.111
23.34	66	2182.8
23.3458	190	535.867
23.3467	240	388.6
23.385	300	29.2444
23.395	119	440.222
23.4042	102	224.333
23.445	117	2547.56
23.475	289	56.8667
23.4992	150	22.2
23.5283	147	24456.4
23.5567	203	14.6
23.5733	347	8.8
23.715	401	16.1333
23.72	221	-86.2222
23.7733	180	782.778
23.7867	199	160.756
23.8158	211	40.5333
23.8392	116	507.933
23.8475	79	189.822
23.8483	141	162.756
23.8592	299	71
23.8758	82	58.3556
23.8825	301	10.8
23.9125	172	3091.18
23.9233	140	100.422
23.93	155	77.7778
23.9308	294	19
23.9333	71	185.156
23.9558	147	14515.7
23.9608	95	889.111
23.9633	148	1321.38
23.9767	75	7814.53
23.9958	226	70.1333
24.0058	109	112.956
24.0608	126	33
24.0692	242	110.956
24.1108	332	231.733
24.1233	73	-26380.9
24.1258	357	1.8
24.1575	261	22.6
24.185	114	53
24.1983	142	10963
24.2067	244	355.889
24.2217	99	253
24.2425	219	139.778
24.2783	294	195.644
24.3142	147	17268.6
24.3225	75	-15374.4
24.3533	176	-1281.38
24.4008	226	1332.36
24.4183	91	311.978
24.4242	258	533.622
24.4692	70	-4329.36
24.5025	141	902.222
24.505	172	2947.09
24.585	331	160.911
24.6192	117	1490.53
24.6425	155	274.778
24.6433	191	189.8
24.645	257	447.756
24.6642	333	94.5111
24.6975	77	7225.09
24.6983	304	468.622
24.7442	65	527.089
24.75	378	27.1111
24.7892	416	59.6889
24.82	474	8
24.8208	438	79.6444
24.8292	450	131.267
24.8333	177	6959.04
24.8342	145	10157.4
24.835	142	716009
24.8417	228	2086.76
24.8583	296	165.822
24.8675	190	10592.9
24.8708	79	1680.22
24.875	111	10996.1
24.895	192	3721
24.9	233	3758.93
24.9058	217	40656.2
24.915	148	55623
24.9283	254	592.4
24.9525	176	-2218.44
25.0692	269	110.267
25.0908	224	334.911
25.12	186	605.467
25.1475	228	22.4
25.1642	100	2094.13
25.1683	86	1431.16
25.1783	228	81.1111
25.1792	93	-72.2444
25.2067	207	193.067
25.2117	221	-196.622
25.23	226	422.733
25.2308	172	954.556
25.2367	73	15716.1
25.2383	208	250.533
25.2467	175	141.422
25.2525	159	224.756
25.2667	217	1507.27
25.2692	183	43.9333
25.2917	105	305.378
25.2992	113	503.4
25.3167	127	383.733
25.3233	172	1062.44
25.3492	408	-36.4667
25.3975	131	-1558.58
25.4108	207	533.044
25.4125	95	75.2
25.4175	73	47267.2
25.4425	254	43.4
25.6025	84	470.289
25.6717	157	855.578
25.6733	81	1274.87
25.6842	330	103.022
25.685	109	778.689
25.7308	258	27.6
25.745	300	14.4
25.7533	72	-989.8
25.775	86	2266.42
25.7808	182	15.8
25.7983	278	90.1333
25.815	199	24.4
25.8325	246	28.8
25.845	210	146.578
25.8733	156	2467.8
25.8783	168	340.2
25.9792	93	254.533
26.0475	90	-652.333
26.06	243	375.067
26.0608	212	29.3111
26.0883	123	52.6889
26.0967	435	31
26.1042	120	171.422
26.1125	451	55.3333
26.2267	71	6753.2
26.245	68	3017.6
26.2742	248	106.8
26.2842	174	13339.4
26.2875	188	1030.44
26.2967	88	2255.22
26.3333	140	553.267
26.3733	327	30.8667
26.385	175	3173.24
26.4342	465	41.3778
26.4367	341	24.4889
26.4825	303	222
26.485	433	24
26.4942	324	391.133
26.5733	294	22.3556
26.595	322	49.6
26.5967	238	135.667
26.6092	327	47.9333
26.6358	219	2746.93
26.65	179	7817.04
26.725	304	72.4444
26.7325	382	66.0667
26.7508	186	391.044
26.76	127	209.089
26.7725	131	1411.8
26.7742	85	709.444
26.7775	119	869.978
26.7992	148	2133.49
26.8133	69	480.111
26.845	230	138.022
26.8492	64	73.6
26.8642	159	1939.24
26.8667	128	581.622
26.8925	74	2491.89
26.9042	189	627.156
26.905	147	15848.4
26.935	127	129.733
26.9467	149	975.444
26.9517	207	164.8
26.9692	131	838.8
26.9767	73	27958.3
26.9867	451	5.6
27.0092	157	620.956
27.0142	84	44.8
27.02	85	232.244
27.0225	219	338.022
27.0358	74	1718.33
27.0458	117	1268.27
27.06	86	173.911
27.0767	147	4013.27
27.0842	301	14.4
27.095	219	466.178
27.1092	131	1385.51
27.1108	171	36.9556
27.1142	133	3118.13
27.12	149	1177.56
27.1283	191	1656.96
27.1317	72	783.511
27.1642	61	672.222
27.1675	108	109.6
27.1958	100	807.867
27.2058	274	153.467
27.2642	207	57.9556
27.2683	104	30.4
27.3392	262	75.0444
27.3408	321	166.111
27.3725	69	35
27.4075	191	82.8
27.4117	203	48.7111
27.4242	245	62.2889
27.4317	80	-27.5556
27.4333	231	206.244
27.435	73	2404.98
27.4358	244	199.8
27.44	143	195.711
27.4425	66	125.867
27.4525	316	16.8889
27.4608	221	48.5111
27.4642	85	9.6
27.4675	189	125.867
27.4692	207	37.2
27.4875	246	27.4
27.4942	362	17.8
27.5133	93	167.2
27.5142	144	30.2222
27.5217	83	27.6
27.535	64	321.511
27.5367	78	73.9333
27.5533	129	338.689
27.5958	327	25.2
27.5983	301	12.6
27.6208	281	11
27.6242	477	4.6
27.6292	125	16
27.6542	83	97.6444
27.6608	261	41.3778
27.6667	231	42.6667
27.6767	217	426.356
27.6883	111	33.3111
27.6975	67	113.111
27.7017	116	189.511
27.7125	212	29.3556
27.7192	130	296.044
27.7275	155	130.533
27.7292	148	343.667
27.7342	66	259.511
27.7675	168	26.6889
27.7958	77	288.689
27.805	83	61.8
27.8225	117	-429.822
27.8567	321	23.7333
27.865	130	88.8444
27.8767	84	-43.4444
27.8792	306	114.511
27.9267	86	6.13333
27.9317	295	-100.133
28	85	39.2
28.0333	67	16.8
28.0375	116	21.8
28.0625	119	72.2444
28.0758	371	40.9333
28.0833	160	16.6
28.1408	175	20.2
28.1533	64	52.4
28.1658	143	40.7778
28.2175	130	90.7333
28.2225	60	65.6
28.2583	166	28.6
28.2625	120	12.6
28.2708	99	132.556
28.2808	132	297.089
28.2867	333	94.2667
28.2942	395	14.4
28.295	104	267.8
28.2967	95	73.2222
28.3008	145	120.756
28.3142	169	219.733
28.3267	74	5574.36
28.3275	103	3333.11
28.3467	159	204.933
28.3475	286	8.2
28.3742	372	8.8
28.4133	149	-171.444
28.4183	69	-77.9333
28.4233	61	180.556
28.475	105	178
28.4975	132	238.956
28.5117	118	36.6222
28.525	269	129.844
28.55	216	48.4
28.5667	202	64.4222
28.5967	107	111.911
28.65	318	2
28.6525	114	-177.111
28.72	93	160.956
28.7258	100	-165.222
28.7392	93	-92.7333
28.74	76	-346.067
28.77	100	113.267
28.785	129	226.8
28.8108	108	4.6
28.8317	133	30.2
28.8458	184	16.3111
28.8617	295	26.1556
28.8867	74	-61.7111
28.8892	169	84.9333
28.9192	190	67.9111
28.9842	162	30.2222
28.9883	388	6
29.0075	103	921.578
29.01	96	92.2667
29.0275	100	148.756
29.0292	274	25.0667
29.0317	182	35.0222
29.0325	122	113.667
29.0333	157	163.156
29.0375	174	462.178
29.0383	104	200.622
29.0392	173	1796.2
29.04	234	115.933
29.0408	131	785.578
29.0417	186	84.9333
29.05	88	48.9333
29.0567	333	36.0667
29.0592	178	49.0667
29.0675	199	1.2
29.07	219	258.244
29.0758	206	44.6889
29.0775	291	24
29.08	259	85.6889
29.0875	194	29.4667
29.1283	127	84.2222
29.1467	67	109.6
29.1483	118	52
29.1917	173	228.333
29.22	300	17.2
29.2492	286	69.8
29.2617	256	44.4
29.2675	426	8.6
29.2708	521	9.2
29.2867	95	259.778
29.3142	338	15.8667
29.3183	324	26.0444
29.345	66	353.956
29.365	192	54.2444
29.3658	175	100.511
29.3733	318	-87.7778
29.3933	204	-246.889
29.4733	162	10.6889
29.485	245	42.1778
29.4875	74	130.667
29.5008	305	73.3556
29.5242	116	14.8
29.5425	320	27.5778
29.5708	151	6
29.6183	78	117.511
29.7267	166	32.2
29.8117	175	129.956
29.8308	72	279.089
29.8367	173	61
29.8892	268	127.311
29.89	111	202.689
29.8925	158	862.644
29.895	210	37.4222
29.8983	122	26.6222
29.8992	71	583.044
29.9	217	6584.16
29.9008	113	389.622
29.9033	114	2579.93
29.9042	173	682.756
29.905	103	16550.4
29.9058	320	3377.2
29.9067	73	115495
29.9075	189	2092.89
29.9083	157	5961.2
29.9092	204	2420.51
29.91	75	10270.8
29.9108	131	2260.69
29.9117	104	1641.02
29.9125	205	10351
29.9133	147	21207.9
29.9142	72	1899.4
29.9158	133	5865.33
29.9167	85	702.511
29.9175	84	4345
29.9183	89	6563.76
29.9192	267	403.333
29.92	179	43
29.9208	225	28.8889
29.9225	101	1563.87
29.925	328	32.8444
29.9392	156	159.378
29.9408	177	237.911
29.9442	220	90.8667
29.9467	117	7076.49
29.9508	172	836.378
29.9733	85	620.067
29.9775	71	614.711
29.9783	124	43.4
29.9792	200	138.8
29.98	86	532.889
29.985	252	14.6889
29.9858	190	736.867
29.9875	172	2046.36
29.9883	101	1845.84
29.9892	104	2409.98
29.99	89	6462.07
29.9908	130	1461.73
29.9917	103	25139
29.9933	205	11897.7
29.9942	76	621.356
29.995	117	9031.38
29.9958	217	7425.69
29.9967	74	11823.8
29.9975	204	2336.36
29.9983	173	1156
29.9992	147	24254
30	189	2397.6
30.0008	187	129.689
30.0017	60	841
30.0025	206	2429.27
30.0042	120	221.578
30.005	192	276.111
30.0058	328	78.0222
30.0067	224	48.3111
30.0083	153	38.1111
30.01	160	162.156
30.0108	97	453
30.0125	212	42.1778
30.0158	90	553.733
30.0167	326	41.0889
30.02	81	166.644
30.0208	88	725.156
30.0225	73	140813
30.0233	66	984.178
30.0242	75	13480.6
30.025	133	9138.29
30.0258	149	2679.78
30.0267	305	489.689
30.0283	164	138.756
30.0292	265	177.2
30.0317	260	174.511
30.0325	225	34.6889
30.0333	399	23.0667
30.0358	247	238.467
30.0375	127	277.133
30.05	146	167.6
30.0525	61	102.556
30.0558	182	58.5333
30.0642	258	39.2889
30.07	83	25.4
30.0708	196	27.4
30.0742	276	24.2
30.0775	103	402.578
30.0792	376	53.4222
30.0858	204	68.8
30.0875	133	233.444
30.0925	245	133.6
30.0983	128	24
30.0992	333	11.4
30.1	157	81.4222
30.1083	191	78.7556
30.1092	306	12.4
30.1267	222	-66.4444
30.1725	91	33.2
30.1942	116	58.6444
30.1975	82	15.8
30.1983	186	49.2222
30.2167	345	24.4
30.22	77	-200.556
30.2267	174	123.444
30.2275	147	1244.62
30.2467	200	21.0222
30.2717	104	135.689
30.2783	86	559.378
30.3833	93	30.2889
30.4058	77	90.5333
30.45	142	75.2
30.4967	82	11.8444
30.6233	104	44.5333
30.6267	174	114.822
30.7592	97	38.6444
30.8308	74	330.533
30.8558	211	5.48889
30.8667	64	-94.8889
30.8717	219	6.2
30.9708	247	30.8
30.9833	207	17.4
30.99	246	908.022
31.0008	130	112.2
31.0067	72	-131.444
31.0075	363	48.5778
31.0375	246	-96.7778
31.0425	128	86.9778
31.045	248	32.3778
31.0492	135	-39.1333
31.0667	156	17.9111
31.0767	129	289.244
31.0775	64	74.8
31.1092	203	85.7556
31.11	138	15.2
31.1483	246	53.8667
31.21	85	19.0667
31.2258	204	30
31.3033	353	4
31.3042	213	8.2
31.3117	64	63.9778
31.3333	97	18.7778
31.3692	72	36
31.3833	92	-36.2444
31.4275	65	13.4
31.4917	72	9.2
31.5392	76	245.267
31.5425	88	36.5111
31.5483	134	67.9778
31.5642	127	43.0444
31.5733	87	106.978
31.6642	139	31.1778
31.6692	130	105.867
31.6767	112	-43.6667
31.7467	209	17.5778
31.7833	135	-36.1333
31.7883	406	65.4444
31.8542	80	-26.8889
31.8642	78	-66.2222
31.9067	63	18.8
31.9292	91	38.4
31.9525	171	15
31.9833	107	27.4889
31.9867	69	95.0667
31.9975	202	26.6
32.0075	186	40
32.0208	116	143.6
32.0242	182	21.0889
32.0275	196	13
32.0358	172	58.6222
32.0567	89	120
32.06	111	19.2
32.0608	101	148.556
32.085	349	62.2667
32.1042	191	17.9556
32.1517	168	8.6
32.1683	261	16.2
32.1842	72	37
32.1908	221	-286.689
32.1917	222	-84.8889
32.195	281	-94.6444
32.1958	64	44.2444
32.1975	295	-100.244
32.2	208	-34.7778
32.2175	73	-2142.84
32.2242	174	82.8444
32.23	101	60.4
32.2317	116	4.6
32.265	218	125.689
32.27	354	4.6
32.3117	92	-22.5556
32.3133	430	25.2
32.385	209	18.8
32.4017	76	48.7111
32.4392	221	-54.4889
32.5667	92	19.9111
32.625	91	34.4
32.6383	211	15.8
32.6967	85	27
32.7142	63	-48.6667
32.7242	326	17.4
32.7808	85	20.4
32.8117	62	42.7778
32.8425	73	-381.133
32.8617	72	20.1111
33.0025	106	39.8222
33.005	71	19.4
33.1008	116	39
33.1533	205	-41.5556
33.2375	89	-50.6667
33.3025	78	51.6222
33.3033	84	26.4667
33.3458	105	27.3333
33.365	73	1089.98
33.4083	174	86.4
33.425	334	7.4
33.4342	116	93.5778
33.445	74	-93.7778
33.54	217	-51.2222
33.5633	196	9.6
33.5975	117	67.6
33.6267	133	55.7333
33.6475	69	65.6222
33.6533	76	59.6667
33.6617	159	1.4
33.69	97	162.6
33.7267	133	380.511
33.73	172	79.2667
33.74	156	23.6
33.775	208	8.6
33.82	203	40.6
33.8758	75	189.8
33.9392	204	14.8
33.9442	85	15.2
34.0167	117	72.2444
34.09	221	-229.578
34.1433	207	-121.578
34.1542	221	-71.1333
34.1908	79	32.4889
34.1933	80	-25.1111
34.2225	100	-39.2222
34.2867	70	17
34.2892	124	9.6
34.3092	137	14.6
34.3483	95	-26.3111
34.4117	89	-254.333
34.6167	125	2
34.6442	131	-317.8
34.6483	201	-54.7556
34.7192	83	14.5556
34.795	100	-37.1333
34.8025	72	25.6667
34.8217	232	24.3778
34.8367	205	-79.1333
34.9267	116	54.8
35.0208	213	33.0889
35.0275	117	351.467
35.0325	204	64.8
35.0375	91	55.4444
35.0633	107	52.5778
35.1167	299	26.4
35.1783	133	-121.978
35.2025	100	55.7778
35.2158	157	-55.7556
35.2508	78	73.9333
35.2608	147	994.489
35.2658	171	20.0444
35.29	148	174
35.3067	103	91.8667
35.3275	75	-267.444
35.3492	92	18.6
35.385	177	-49.1111
35.4192	135	-38.3333
35.425	96	9.08889
35.4475	100	-26.1111
35.475	71	65.8889
35.4933	92	-25.3333
35.5042	91	11.2
35.5125	131	118.8
35.5133	72	95.3556
35.5192	148	204.667
35.5242	87	93.8222
35.5342	150	167.289
35.535	149	1948.89
35.5367	65	101.8
35.5467	167	500.667
35.5483	149	-2589
35.55	167	-680.111
35.5558	112	-92.2667
35.5667	122	-32.4444
35.5717	104	-176.622
35.8542	141	9.4
35.8567	147	-1020.24
35.8617	73	-1676.89
35.8783	209	-30.2222
35.8842	207	-170.378
35.96	63	211.333
35.965	354	12.6
35.975	387	11.4
35.9917	299	353.2
35.9967	62	968
36.0083	97	21933.8
36.0108	434	33.8667
36.0117	385	60.7778
36.0125	457	119.267
36.0158	75	239067
36.0183	70	16138.8
36.0192	61	23963.3
36.0208	117	73485.6
36.0225	147	283536
36.0242	87	14228
36.0275	414	35.6
36.0283	76	14834.6
36.0325	79	2845.42
36.0333	69	44997
36.0358	74	214437
36.0383	73	2.09714e+06
36.0392	72	46819.9
36.04	99	29048.2
36.0408	71	11664.4
36.0442	330	57.3778
36.0467	547	55.8667
36.0483	80	2518.82
36.05	104	30839.2
36.0508	111	37016.4
36.0517	129	109226
36.0525	217	316086
36.0542	300	264.133
36.0558	63	557.311
36.0575	282	38622.4
36.0733	134	19706.3
36.0792	243	81245.5
36.085	84	31849.1
36.0875	83	8160.6
36.0883	259	119979
36.0892	245	196703
36.0908	219	35479.4
36.0992	237	111942
36.1008	230	261621
36.12	92	290.622
36.1258	107	311.689
36.1433	66	1452.98
36.1508	318	58.0889
36.165	197	144.6
36.1867	76	2232.36
36.19	164	453
36.1967	224	82.2667
36.1975	291	160.444
36.2033	229	347.756
36.255	126	290.467
36.2833	541	261.044
36.3	172	163.289
36.3033	239	159.111
36.3217	165	295.622
36.3317	98	294.4
36.3583	78	-56.2222
36.36	165	191.822
36.3708	180	65.0444
36.3733	81	625.444
36.395	205	222.489
36.4025	88	345.756
36.4108	171	289.578
36.4117	170	270.911
36.4167	105	384.444
36.4367	135	588.156
36.455	104	471.844
36.4583	141	216.422
36.4592	204	127.911
36.4692	70	553.133
36.4825	209	1198.07
36.4908	125	131.578
36.4933	116	715.778
36.5075	61	554.889
36.5242	67	372.911
36.5358	64	65.0222
36.5525	69	967.244
36.5567	193	2083.24
36.5783	81	328.911
36.5867	129	1595.73
36.5975	127	98
36.6767	204	75.6222
36.6883	217	2465.8
36.6992	317	13.4667
36.7033	245	1094.93
36.7308	79	42.1556
36.7592	116	196.578
36.7742	69	331.911
36.7792	143	187.756
36.8	348	33.9111
36.8075	237	477.6
36.8167	230	1628
36.8267	81	76.2889
36.8292	273	7.86667
36.8442	70	99.1333
36.8833	91	45.5778
36.9417	185	47.2667
36.9633	160	24.2
36.9808	85	147.267
36.99	119	105.6
37.0342	166	67.6889
37.0675	437	17.6
37.1233	230	838.422
37.1767	146	52.8
37.1917	154	11.8667
37.2058	64	-94.1556
37.2333	103	717.867
37.2517	184	14.2
37.325	191	60.6667
37.3317	169	118.778
37.3583	85	35.2667
37.3925	119	46.0222
37.4	218	50.6
37.405	217	549.156
37.4867	74	89.8
37.4917	480	7.2
37.4933	60	61.4
37.5333	217	395.933
37.65	81	-49.8889
37.665	135	-45.8889
37.7192	72	72.5333
37.8775	217	114.2
37.9917	455	24.4
37.9925	77	1996.96
37.9933	81	-128.333
38.0758	183	12.8
38.1358	149	651.111
38.2175	307	30.2
38.3033	62	39.3778
38.365	96	-70
38.4558	267	37.0667
38.54	480	6.2
38.5417	64	446.978
38.6658	63	77.4222
38.6783	144	97.4444
38.6917	82	79.6
38.6975	103	-651.356
38.7475	217	345.578
38.935	94	-38.2222
39.0242	72	87.4222
39.0458	193	30.4222
39.1142	71	14.6
39.1408	204	77.8444
39.1558	83	10.2
39.2092	116	20.0667
39.2117	61	-67.2222
39.2217	81	-43.2222
39.2867	221	-42.2444
39.305	73	104.8
39.3183	167	27.9778
39.3225	76	48.6667
39.3283	69	38.0444
39.3667	265	-10.3333
39.3733	135	-59
39.4017	516	9.6
39.415	92	-64.1333
39.4225	209	-30.3333
39.4483	187	8.2
39.6425	80	-34.5556
39.7325	73	2027.33
39.7567	79	-127.733
39.7933	191	-31.2222
39.8517	93	-56.6667
39.9525	165	24.9111
39.9725	112	15
39.9733	82	9.4
39.9792	81	34.1556
40.0217	71	27.2222
40.0508	67	40
40.1417	108	4.6
40.1508	129	154
40.1858	111	27.8
40.19	91	20
40.2042	61	84.4889
40.2117	190	51.5111
40.27	207	-108.956
40.2842	222	-56.8889
40.335	76	59.4
40.3717	73	485.4
40.4075	69	53.0222
40.4308	135	-46.1333
40.5067	84	73.5333
40.51	67	409.644
40.5133	81	322.6
40.5175	95	249.622
40.52	129	913.044
40.5208	101	246.111
40.5225	69	584.778
40.5233	116	121.711
40.525	74	239.378
40.5258	83	371.244
40.5275	117	235.089
40.5283	82	66.1111
40.53	221	-381.356
40.535	369	-43.9778
40.6292	66	-42.8889
40.7558	65	10.6
40.7942	96	17.6
40.8325	105	28.6
40.8867	142	18
40.9	61	-107.667
40.9025	96	-53.3333
40.92	332	3.8
40.9508	408	3
41.0658	64	-123.778
41.11	76	52
41.1133	149	-72.4444
41.1667	76	-44.3333
41.2192	84	42.2
41.2225	82	27.4667
41.23	135	-74.7778
41.2333	85	36.4
[truncated: 130 more rows]

## Sheet: EE2 D10
All Metabolites				Increased Metabolites					Decreased Metabolites
Ret(min)	EE2 Mass	EE2- CTL		Ret(min)	EE2 Mass	EE2- CTL	Metabolites		Ret(min)	EE2 Mass	EE2- CTL	Metabolites
8.13	91	22910.9		8.13	91	22910.9			8.45	77	-8579.75
8.15	150	148.075		8.32	108	5444.5			10.43	116	-5.44151e+06
8.18	108	54.125		8.38	70	11461.5			10.43	126	-8056.23
8.21	107	250		8.4	89	40357.7			10.73	79	-66881.7	Glycine, 2 TMS
8.22	138	132.4		8.42	100	20210.5			10.87	66	-9748.88	Ethanedioic acid, 2 TMS
8.23	166	260.275		8.62	114	7574.38			11.25	152	-13374.7
8.28	129	3334.4		8.66	145	8068.5			11.83	148	-29064.4	Pentasiloxane
8.28	162	1659.2		8.72	89	105448			12.83	129	-14890.3
8.32	108	5444.5		8.74	207	5818.43	carbamate		12.84	156	-28833.7	L-Valine, 2 TMS
8.35	168	741		8.75	113	46569.2			13.16	89	-9619.15	Propanoic acid, 2 TMS
8.37	84	2462.97		8.75	190	6310.62			14.1	133	-674082	L-isoleucine
8.38	70	11461.5		8.78	73	2.16879e+06			14.6	149	-15055.8	nicotinate
8.4	89	40357.7		8.78	149	106330			15.23	147	-42036.9	Cyclohexasiloxane
8.42	100	20210.5		8.78	160	15544.1			15.3	73	-1.16452e+06
8.42	90	3857.62		8.79	74	194854			15.3	149	-40725.7
8.42	177	686.45		8.79	115	77141.8	Pyridine, 1 TMS		15.31	130	-43537.6	propanoic acid, 3 TMS
8.42	178	249.075		8.79	266	73586.8			15.31	66	-22048.9
8.45	77	-8579.75		8.79	85	16725.5			15.89	77	-11836.9	Serine, 3 TMS
8.46	72	-2050.8		8.79	84	13230.2			16.58	73	-77912.1
8.49	88	1396.4		8.79	205	11560.8			16.8	73	-206461
8.52	66	2455.8		8.79	130	5854.75			16.81	89	-8022.3
8.62	114	7574.38		8.79	146	5538.52			16.82	102	-11678.2
8.66	145	8068.5		8.79	98	5175.15			17.64	100	-6624.62
8.68	65	2124.93		8.8	78	47038			18.36	84	-27561.8
8.69	175	-1381.38		8.8	121	33041.3			18.53	71	-6445.75
8.72	89	105448		8.8	116	19996.8			18.78	148	-396579
8.73	300	117.55		8.8	177	8886.8			18.78	150	-38151.3
8.74	207	5818.43		8.8	129	6674.52			18.79	193	-23305.1
8.74	180	2895.15		8.81	81	15923.7			19.39	219	-6725.62
8.75	113	46569.2		8.81	155	11981.2			19.44	102	-36693.2
8.75	190	6310.62		8.82	100	582482			21.37	141	-17398.4
8.77	216	366.55		8.84	174	489402			21.38	246	-704317
8.78	73	2.16879e+06		8.87	152	69153.6			21.38	158	-109828
8.78	149	106330		8.88	97	7683.38			21.38	174	-23873.5	Glutamic acid, 3 TMS
8.78	160	15544.1		8.91	136	46305.8			21.39	103	-73132.3
8.78	226	4895.77		8.91	138	10197.6			21.4	96	-11313.4
8.78	195	1181.47		8.91	94	9848.6			21.41	97	-11590.4
8.79	74	194854		8.92	66	63100.5			21.42	117	-97029
8.79	115	77141.8		8.92	67	40323.2			21.53	73	-120145
8.79	266	73586.8		8.93	92	25280.2			21.53	74	-18544.8
8.79	85	16725.5		8.93	168	22343.1			21.94	89	-10236	Glycerol, 3 TMS
8.79	84	13230.2		8.93	123	20124			21.96	73	-521530
8.79	205	11560.8		8.93	64	10267.5			22.2	77	-30146
8.79	130	5854.75		8.94	153	175323			22.22	63	-6390
8.79	146	5538.52		8.94	166	159578			22.25	196	-37727.9
8.79	98	5175.15		8.94	72	26035.6			22.26	172	-195445
8.79	238	156.625		8.96	137	23331.8			22.27	225	-347276
8.8	78	47038		9	152	957227			22.27	238	-232969
8.8	121	33041.3		9	154	44479.8			22.28	226	-69503
8.8	116	19996.8		9.03	148	13891.3			22.29	246	-5393.52
8.8	177	8886.8		9.08	77	49056			22.33	330	-23275.1
8.8	129	6674.52		9.09	318	30803			22.34	122	-9005.98
8.8	209	3306.82		9.09	225	29687.6			22.7	149	-14193.6
8.8	156	2047.7		9.11	226	6303.3			22.77	73	-473483
8.8	261	444.5		9.12	74	20364.7			23.22	64	-13414.4
8.81	81	15923.7		9.12	133	13345.4			24.47	142	-22413.3
8.81	155	11981.2		9.15	319	6369.88			24.55	102	-6968.05
8.81	293	165.6		9.16	147	68504.4			24.93	126	-44273.6	1,2,3-Propanetricarboxylic acid
8.81	284	94.475		9.19	148	13764.8	Propanoic acid, 2 TMS		28.37	73	-237145	Inositol, 6 TMS
8.82	100	582482		9.61	75	22634.8	Acetic acid, 2 TMS		28.37	147	-37054.2
8.84	174	489402		9.93	60	5041.15
8.84	126	109.1		9.96	101	7086.18
8.87	152	69153.6		10.31	79	137555
8.87	285	94.475		10.34	244	54464.6
8.88	97	7683.38		10.34	245	9675.88	l-Alanine, 2 TMS
8.91	136	46305.8		10.36	151	75995.4
8.91	138	10197.6		10.36	170	11494
8.91	94	9848.6		10.36	124	5162.3
8.92	66	63100.5		10.85	78	9181.12
8.92	67	40323.2		11.15	78	8425.52	Pyridine
8.92	169	4783.62		11.19	150	9097.6
8.93	92	25280.2		11.22	152	65540.2	ethane, 2 TMS
8.93	168	22343.1		11.24	153	8574.58
8.93	123	20124		12.03	73	549045
8.93	64	10267.5		12.03	168	12220.1	Dithioerythritol, 4 TMS
8.94	153	175323		12.04	147	84218.6
8.94	166	159578		12.24	210	14425.6	Ethanimidic acid, 2 TMS
8.94	72	26035.6		12.31	77	7750.98
8.94	139	1681.2		12.37	147	256491	sulfate, 2 TMS
8.95	101	1717.42		12.42	77	30540
8.96	137	23331.8		12.43	221	23552.3
8.96	120	3573.75		12.43	100	22158.7
8.97	226	103.2		12.43	248	8554.73
9	152	957227		12.43	168	6517.62
9	154	44479.8		12.44	207	8792.45
9.01	105	-4167.75		12.49	147	74354.6	2-Butenedioic acid
9.02	119	-1930.62		12.63	192	21051.3
9.03	148	13891.3		13.23	147	88612.6
9.08	77	49056		13.23	77	8048.68	trans-3-Hexenedioic acid, 2 TMS
9.08	135	4083.57		13.27	79	5464.77
9.08	88	3658.57		13.3	147	21888.3
9.08	102	2613.18		13.47	242	5566.27	Urea
9.09	318	30803		14.66	60	12015.5
9.09	225	29687.6		14.66	61	7666.1
9.09	208	1861.88		14.67	63	34104.8
9.09	252	1614.85		14.67	75	29758.5
9.09	167	968.45		14.68	103	10958.9	L-Proline
9.09	321	625.95		14.69	133	34124.2
9.1	120	4897.77		14.69	70	25576.7
9.1	117	4671.43		14.69	150	5532.9
9.1	179	1443.58		14.7	73	472945
9.1	136	1026.53		14.7	77	311290
9.1	231	32.85		14.7	130	264626
9.11	226	6303.3		14.7	88	47907.3
9.11	78	4301.93		14.7	95	33032.9
9.11	221	4119.38		14.7	80	21212.6
9.11	137	3990.32		14.7	155	18917.1
9.11	121	3779.9		14.7	82	10388.2
9.11	153	3766.93		14.71	132	18972.7
9.11	87	2868.12		14.71	91	11335.2
9.11	104	2441.65		14.71	90	9612.6
9.11	92	608.2		14.71	89	8637.17
9.12	74	20364.7		14.71	187	8485.1
9.12	133	13345.4		14.71	65	8272.1
9.12	146	931.65		14.73	102	55270.1
9.13	171	304.3		14.73	100	30201.3
9.14	107	2241.72		14.73	129	13040.2
9.15	319	6369.88		14.73	134	10739.2
9.16	147	68504.4		15.4	191	5456.27
9.19	148	13764.8		15.41	84	10307	Pyrimidine, 2 TMS
9.2	131	732.8		15.41	68	8171.35
9.22	319	54.1		16.38	86	9955.48	L-threonine, 3 TMS
9.33	186	22.05		16.61	217	5454.45
9.42	152	1400.22		16.84	113	30797.7
9.43	214	16.2		16.89	73	221824	Ethanesulfonic acid, 2 TMS
9.45	187	57.825		16.89	61	6054.52
9.47	154	1310		16.9	100	19559.2
9.47	284	150.625		17.65	186	6847.18
9.47	300	105.525		17.65	96	5321.65
9.49	144	569.05		17.68	193	8207.7
9.5	285	64.3		17.76	76	6807.5
9.51	124	150.35		17.81	73	148406
9.58	65	170.7		17.82	148	10861.7
9.59	285	249.5		17.84	70	30589.3
9.6	188	40.6		17.85	129	20936.5
9.61	75	22634.8		18.41	77	11977.4
9.62	106	664.325		18.54	60	25080
9.62	243	35.875		18.66	79	13935.8
9.63	286	31.85		18.68	129	8982.2
9.65	171	134.625		18.74	144	15525.1	Butanedioic acid, 3 TMS
9.69	207	115.175		18.91	100	17366.2
9.69	244	51.125		18.91	153	7993
9.71	144	453.825		18.95	60	12508
9.88	153	-969.875		18.96	86	15385.9
9.93	60	5041.15		19.27	146	7166.05	L-Proline, 2 TMS
9.95	100	2167.22		19.36	79	8689
9.96	101	7086.18		19.37	144	16947.6
9.97	212	179.025		19.38	75	719396
10.05	111	111		19.4	189	33658.4
10.17	172	485.775		19.4	146	10870.9
10.18	187	258.625		19.42	188	138104
10.18	240	172.8		19.77	84	10829.2	2-Butenoic acid
10.2	84	1764.88		20.01	156	18927.2
10.23	173	140.125		20.04	64	10280.3	Methylmalonic monoamide, 2 TMS
10.28	155	3999.68		20.07	171	7020.7
10.29	127	2170.47		20.09	64	10108.4
10.29	185	27.6		20.17	64	12555.1
10.31	79	137555		20.26	82	5104.2
10.31	169	410.95		20.34	100	9099.27
10.32	65	2794.78		20.35	64	9052.88
10.32	126	454.85		20.38	75	48378.2
10.33	317	483.1		20.4	84	39056.9	Pentanedioic acid, 2 TMS
10.34	244	54464.6		20.58	96	27232.7
10.34	245	9675.88		20.58	214	11546.9
10.34	243	306.325		20.6	232	6238.85
10.36	151	75995.4		20.73	174	10764.7
10.36	170	11494		20.94	232	24130.2
10.36	124	5162.3		21.34	91	13843.4	L-aspartic acid
10.36	179	1078.75		21.82	75	58960.4
10.36	108	422.825		21.99	118	10614.1	Gluconic acid, 6 TMS
10.4	236	-311.025		22	204	86933.7
10.41	345	-48.375		22	117	59630.8
10.43	126	-8056.23		22	205	36550.7
10.43	116	-5.44151e+06		22	217	29095.3
10.44	332	-63.75		22	89	27214.9
10.45	113	2789.8		22	201	25750
10.49	130	-1879.75		22	189	19143.1
10.5	282	85.775		22	172	13061.5
10.53	199	-182.825		22	218	7473.02
10.58	88	-1772.62		22.03	102	14978
10.62	104	1292.4		22.21	130	456522
10.62	120	1259.03		22.21	134	99519.8
10.73	79	-66881.7		22.21	254	18698.1	aminoethanesulfonic acid, 3 TMS
10.76	238	2623.9		22.21	198	8271.55
10.76	97	646.65		22.24	238	401148
10.76	125	213.35		22.24	205	11633.5
10.78	160	1146.45		22.6	67	7218.27
10.79	242	1626.83		22.68	79	11842.1
10.79	94	1322.45		22.81	61	12422
10.79	239	362.6		22.86	114	6740.8
10.82	65	-1303		22.9	133	18268.9	Butanoic acid, 3 TMS
10.84	114	728.575		22.91	130	23668.4
10.85	78	9181.12		23.36	78	6889.88
10.87	66	-9748.88		23.37	106	14172.2
11.04	211	-122.375		23.75	133	7216.88
11.05	184	52.725		23.76	231	23888.6	Phosphonic acid, 4 TMS
11.06	241	185.2		23.76	142	12458.1
11.07	146	1059.7		23.96	180	5811.3
11.13	359	77.875		24.04	75	8635.8
11.13	284	66.55		24.97	126	77745.8	DL-Ornithine, 4 TMS
11.15	78	8425.52		25.21	70	5898.52
11.15	261	68.05		25.22	126	19573.7	Citrulline, 4 TMS
11.15	378	48.6		25.23	84	5146.48
11.18	127	2281.07		26.08	75	52328	d-mannose
11.18	215	935.7		26.33	374	10192.6	d-Glucose, 5 TMS
11.19	150	9097.6		26.37	111	11812.6
11.19	65	4851.2		26.38	91	12069.9
11.19	94	1654.28		26.39	101	88381.8
11.22	152	65540.2		26.62	274	6887.1
11.22	92	3157.4		27.58	73	14916.2
11.22	136	3072.93		28.4	75	14290.5
11.23	151	2215.7		28.4	74	9935.2	Hexadecanoic acid
11.24	153	8574.58		28.44	129	6302.5
11.24	154	2632.8		28.45	73	126449
11.25	328	123.35		30.04	147	22829.4	d-Galactose, 5 MS
11.25	152	-13374.7		30.35	73	41902
11.32	160	1931.4		30.35	103	7351.05
11.32	187	1814.47		30.41	73	33016.2
11.32	91	1604.25		30.41	103	5048.27
11.32	269	495.15		32.4	75	15130.9
11.34	144	381.075		32.4	133	5166.68	Glycoside, 3 TMS
11.35	97	868.3		36.37	147	8737.52
11.37	95	269.8		36.56	74	5794.65
11.4	220	176.5		36.9	147	5255	Maltose, 8 TMS
11.47	117	326.6		37.47	73	16958.7
11.51	146	92.025		37.66	73	16947.3
11.54	190	323.375		39.02	73	30771.2	2-à-Mannobiose, 8 TMS
11.56	106	176.05		39.02	103	5322.4
11.56	191	-2501.28		39.03	147	5636.48
11.57	267	1105.12		39.09	73	5475.77
11.57	165	-1684.45		39.6	129	11838.2	à-D-Galactopyranoside, 8 TMS
11.62	204	844.4		39.6	160	7577.35
11.65	158	92.85
11.67	122	1502.97
11.67	214	661.05
11.7	200	134.875
11.71	389	130.175
11.79	220	413.3
11.81	67	-4387.2
11.83	148	-29064.4
11.84	269	-92.025
11.87	152	1881.03
11.91	95	403.8
11.93	61	4626.2
11.99	176	-366.675
12.03	73	549045
12.03	168	12220.1
12.03	185	46.2
12.04	147	84218.6
12.04	177	3148.5
12.04	95	1229.4
12.14	195	901.75
12.16	107	1071.05
12.17	122	125.55
12.23	106	1957.03
12.24	210	14425.6
12.24	187	358.025
12.25	159	364.525
12.28	154	41.8
12.29	188	627.55
12.31	77	7750.98
12.37	147	256491
12.4	319	137.325
12.4	182	61.025
12.41	340	206.775
12.42	77	30540
12.42	176	825.675
12.42	175	759.275
12.42	298	181.6
12.43	221	23552.3
12.43	100	22158.7
12.43	248	8554.73
12.43	168	6517.62
12.43	205	3354.1
12.43	151	3015
12.44	207	8792.45
12.44	226	3712.75
12.44	101	3542.15
12.44	208	1696.83
12.44	252	1437.22
12.44	104	1435.9
12.44	95	1253.45
12.44	250	1123.22
12.44	405	146.45
12.46	229	844.25
12.48	244	129.275
12.49	147	74354.6
12.5	174	154.775
12.51	98	-2006.92
12.59	316	1496.05
12.63	192	21051.3
12.63	222	749.35
12.65	263	327.825
12.71	189	-4303.38
12.76	384	-36
12.79	183	78.2
12.82	62	-2249.65
12.83	129	-14890.3
12.84	156	-28833.7
12.91	100	2374.1
12.93	105	2209.68
12.94	155	1260.9
12.94	229	417.525
13.16	89	-9619.15
13.22	101	3375
13.22	78	2447.38
13.23	147	88612.6
13.23	77	8048.68
13.23	69	3003.38
13.27	79	5464.77
13.27	229	61.2
13.29	101	1765.58
13.29	64	912.9
13.3	147	21888.3
13.3	158	625.575
13.31	71	1000.1
13.47	242	5566.27
13.47	76	1251.35
13.47	90	554.025
13.47	157	445.95
13.47	64	419.725
13.48	258	42.275
13.54	153	313.7
13.58	110	140.175
13.59	130	974
13.63	146	1079.47
13.66	180	-649.125
13.71	153	58.45
13.75	76	1753.75
13.75	60	1481.7
13.76	104	503.725
13.77	71	618.625
13.8	156	149.425
13.81	178	-40.125
13.83	218	101.6
13.91	142	2732.7
13.91	111	969.6
13.91	65	967.4
13.91	244	602.175
13.92	63	581.4
13.93	156	332.175
13.96	163	1411.67
13.99	272	121.875
14.08	242	-780.725
14.1	133	-674082
14.14	407	42.325
14.26	233	35.825
14.38	60	-3433.75
14.41	120	-1760.8
14.6	149	-15055.8
14.66	60	12015.5
14.66	61	7666.1
14.67	63	34104.8
14.67	75	29758.5
14.67	230	247.075
14.68	103	10958.9
14.68	109	2468.45
14.68	231	716.475
14.69	133	34124.2
14.69	70	25576.7
14.69	150	5532.9
14.69	192	4393.2
14.69	284	2762.12
14.69	110	2533.95
14.7	73	472945
14.7	77	311290
14.7	130	264626
14.7	88	47907.3
14.7	95	33032.9
14.7	80	21212.6
14.7	155	18917.1
14.7	82	10388.2
14.7	146	4912.93
14.71	132	18972.7
14.71	91	11335.2
14.71	90	9612.6
14.71	89	8637.17
14.71	187	8485.1
14.71	65	8272.1
14.71	267	2260.47
14.71	172	1786.62
14.73	102	55270.1
14.73	100	30201.3
14.73	129	13040.2
14.73	134	10739.2
14.73	190	4031.12
14.73	306	1255.78
14.73	218	850
14.73	307	388.6
14.73	308	158.125
14.73	292	63.6
14.74	177	2051.07
14.79	274	-755.625
14.8	233	-371.825
14.82	398	-52.925
15.05	306	1327.58
15.06	241	-580.45
15.1	210	549.175
15.11	208	4614.15
15.11	249	988.975
15.11	267	317.9
15.11	162	68.775
15.16	201	88.075
15.2	100	2986.5
15.2	168	1053.03
15.23	147	-42036.9
15.29	331	337.225
15.3	250	-82.625
15.3	228	-118.775
15.3	113	-1645.12
15.3	149	-40725.7
15.3	73	-1.16452e+06
15.31	144	-906.425
15.31	66	-22048.9
15.31	130	-43537.6
15.32	268	-105.3
15.34	330	1006.12
15.35	69	1230.47
15.38	246	-47.125
15.39	172	1569.38
15.39	263	1248.7
15.39	130	600.925
15.4	191	5456.27
15.4	260	2402.4
15.4	60	1649.28
15.4	261	593.65
15.4	234	81.3
15.41	84	10307
15.41	68	8171.35
15.41	275	4701.38
15.41	158	3777.22
15.41	142	3598.4
15.41	83	2805.68
15.41	245	868.7
15.44	69	3227.1
15.44	156	1439.25
15.44	246	163.075
15.45	277	349.6
15.46	264	66.05
15.48	207	2066.3
15.48	178	1134.58
15.48	145	528.35
15.48	265	329.625
15.48	190	303.85
15.49	237	325.075
15.51	289	147.3
15.52	287	40
15.55	84	2104.4
15.55	221	889.35
15.55	81	607.8
15.56	174	1108.67
15.6	204	529.325
15.61	124	119.25
15.62	91	322.825
15.68	182	86.8
15.83	278	-365.75
15.85	142	1958.22
15.89	77	-11836.9
15.96	209	-291.15
16.1	166	680.375
16.12	206	462.725
16.12	151	-183.125
16.14	262	15.4
16.19	292	2728.15
16.19	88	425.5
16.21	198	221.65
16.21	153	60.175
16.21	185	-48.05
16.22	188	543.225
16.23	60	994.95
16.23	151	255.4
16.23	222	166.975
16.25	248	170.95
16.25	203	75.9
16.26	252	42.45
16.29	117	-2470.15
16.32	116	2494.75
16.32	101	2247.72
16.33	239	30
16.34	316	35.4
16.36	69	565.175
16.37	130	4254.15
16.38	86	9955.48
16.39	99	2447.55
16.39	85	1377.12
16.4	160	1706.6
16.42	217	93.725
16.43	277	84.35
16.44	276	265.75
16.44	278	32.7
16.58	73	-77912.1
16.61	217	5454.45
16.62	139	189.5
16.64	128	-1316.83
16.64	132	-2153.2
16.65	163	-133.575
16.65	129	-2328.35
16.66	214	156
16.66	86	-1879.1
16.67	98	-708.375
16.69	142	240.125
16.75	100	397.575
16.76	242	1293.2
16.76	209	172.125
16.8	73	-206461
16.81	89	-8022.3
16.82	60	-3830.7
16.82	102	-11678.2
16.84	113	30797.7
16.84	120	1974.85
16.84	87	-4814.5
16.85	208	296
16.85	321	169.9
16.86	203	155.6
16.88	130	4146.12
16.88	95	2447.82
16.88	141	2445.18
16.88	153	1187.75
16.89	73	221824
16.89	61	6054.52
16.9	100	19559.2
16.91	85	2333.25
16.91	213	248.025
16.92	177	306.675
16.92	215	112.55
16.93	174	2204.75
16.96	206	111.525
16.98	330	186.075
17	228	-16
17.01	256	-490.15
17.03	78	-2026.4
17.05	151	344.05
17.07	120	-2190.8
17.07	255	-3378.5
17.09	65	-612.55
17.09	211	-1501.08
17.16	130	879.2
17.17	128	-497.475
17.18	93	242.4
17.29	86	1436.4
17.35	101	175
17.38	225	73.4
17.39	165	-292.875
17.57	63	1938.6
17.58	143	2360.18
17.59	330	1197.33
17.61	221	507.15
17.61	161	-269.325
17.61	140	-413.375
17.63	132	-2032.8
17.64	331	407.325
17.64	140	228.5
17.64	100	-6624.62
17.65	186	6847.18
17.65	96	5321.65
17.65	200	4624.45
17.68	193	8207.7
17.68	105	2562.15
17.71	240	586.35
17.71	169	134.375
17.71	402	81.425
17.73	356	466.725
17.73	401	142.95
17.74	357	170.95
17.76	76	6807.5
17.76	119	899.05
17.79	113	1167.97
17.79	277	583.35
17.8	174	1066.12
17.81	73	148406
17.81	89	3337.05
17.81	160	1737.6
17.82	148	10861.7
17.82	69	4557.77
17.82	144	1463.03
17.83	172	1633.9
17.83	357	875.25
17.84	70	30589.3
17.84	164	130.25
17.85	129	20936.5
17.85	304	1534.33
17.86	358	199.775
17.87	95	223.55
17.9	81	2480.5
17.9	245	153.2
17.93	109	214.05
17.98	187	1361.47
18.27	329	121.75
18.28	354	194
18.36	84	-27561.8
18.41	77	11977.4
18.47	321	-77.125
18.52	155	2112.72
18.53	71	-6445.75
18.54	60	25080
18.57	173	-538.75
18.65	127	987.45
18.66	79	13935.8
18.68	129	8982.2
18.71	96	1514.75
18.71	211	1174.35
18.71	242	371.375
18.74	144	15525.1
18.78	150	-38151.3
18.78	148	-396579
18.79	193	-23305.1
18.81	180	-1399.6
18.83	155	1521.08
18.91	100	17366.2
18.91	153	7993
18.91	256	1849
18.93	67	-1464.75
18.95	60	12508
18.96	86	15385.9
18.98	96	-1162.25
18.99	214	-290.525
19	301	131.4
19.05	90	532.125
19.06	260	28.625
19.11	259	96.3
19.13	167	889.45
19.16	334	100
19.25	145	-468
19.27	146	7166.05
19.29	350	96.925
19.32	236	-260
19.36	79	8689
19.37	144	16947.6
19.38	75	719396
19.39	219	-6725.62
19.4	189	33658.4
19.4	146	10870.9
19.4	93	2074.4
19.42	188	138104
19.42	192	3776.07
19.44	102	-36693.2
19.5	202	-336.25
19.54	231	-3159.25
19.6	240	907.075
19.6	273	-505.525
19.77	84	10829.2
19.81	139	152.675
19.84	95	399.925
19.86	61	4387.35
20.01	156	18927.2
20.04	64	10280.3
20.07	171	7020.7
20.09	64	10108.4
20.16	261	339.8
20.17	64	12555.1
20.2	140	936.525
20.26	82	5104.2
20.27	262	499.175
20.27	125	152.3
20.28	255	209
20.29	218	4233.68
20.31	364	44.575
20.32	263	168
20.34	100	9099.27
20.35	64	9052.88
20.35	330	600.7
20.36	125	200.225
20.38	75	48378.2
20.39	85	3112.78
20.4	84	39056.9
20.44	158	2875.18
20.46	76	3737
20.46	285	45.9
20.54	211	-319.075
20.54	120	-361.125
20.56	260	1636.28
20.57	124	643.7
20.58	96	27232.7
20.58	214	11546.9
20.58	61	1969.8
20.6	232	6238.85
20.63	329	255.3
20.73	174	10764.7
20.8	82	3361.1
20.8	78	2559.65
20.8	215	600.55
20.84	219	2225.32
20.88	78	2486.28
20.92	215	-505.8
20.94	232	24130.2
20.94	316	652.925
21.02	62	-2021.5
21.02	110	-2732.25
21.05	351	-209.25
21.28	255	1138.58
21.34	91	13843.4
21.37	141	-17398.4
21.38	174	-23873.5
21.38	158	-109828
21.38	246	-704317
21.39	103	-73132.3
21.4	96	-11313.4
21.41	97	-11590.4
21.42	117	-97029
21.52	160	-551.125
21.53	74	-18544.8
21.53	73	-120145
21.55	247	2408.8
21.55	271	122.175
21.56	103	-4260.23
21.57	232	2670.53
21.58	421	81.2
21.58	142	-4991.25
21.6	166	146.725
21.63	206	180.25
21.67	211	1062.2
21.82	75	58960.4
21.84	300	1509.45
21.91	91	-843.75
21.92	223	-309.75
21.92	193	-423.5
21.92	192	-559
21.94	125	-124.75
21.94	118	-4342.12
21.94	89	-10236
21.95	215	-837.75
21.95	159	-1286.38
21.96	191	-3047.75
21.96	73	-521530
21.98	200	2836.8
21.98	163	2135.25
21.98	125	344.75
21.99	118	10614.1
21.99	303	881.2
22	204	86933.7
22	117	59630.8
22	205	36550.7
22	217	29095.3
22	89	27214.9
22	201	25750
22	189	19143.1
22	172	13061.5
22	218	7473.02
22	231	3138.62
22	330	2317
22	215	1861.7
22.01	186	2706.03
22.03	102	14978
22.03	248	443.6
22.04	274	734.3
22.17	307	160.75
22.2	193	3697.68
22.2	77	-30146
22.21	130	456522
22.21	134	99519.8
22.21	254	18698.1
22.21	198	8271.55
22.22	112	-4437.1
22.22	63	-6390
22.24	238	401148
22.24	205	11633.5
22.25	196	-37727.9
22.26	172	-195445
22.27	238	-232969
22.27	225	-347276
22.28	226	-69503
22.29	206	-4031.18
22.29	246	-5393.52
22.33	330	-23275.1
22.34	122	-9005.98
22.38	140	-2915.75
22.51	215	2659.6
22.6	67	7218.27
22.68	79	11842.1
22.7	67	4828.5
22.7	149	-14193.6
22.77	73	-473483
22.8	284	204.175
22.81	61	12422
22.86	114	6740.8
22.9	133	18268.9
22.91	130	23668.4
23.04	91	-765.575
23.07	216	406.025
23.08	276	205.425
23.12	179	316.125
23.22	64	-13414.4
23.3	241	-154.825
23.35	99	417
23.36	78	6889.88
23.36	221	1565.1
23.37	106	14172.2
23.37	107	834.325
23.38	129	3714.28
23.39	69	1491.47
23.39	180	376.925
23.39	136	353.575
23.39	224	71.225
23.39	177	58.3
23.4	191	243.95
23.4	139	203.875
23.51	69	-1324.75
23.61	347	92.175
23.64	378	33.5
23.66	320	40.325
23.67	87	-1029
23.7	201	-101.5
23.72	95	-274.25
23.75	133	7216.88
23.76	231	23888.6
23.76	142	12458.1
23.76	95	3590.62
23.76	217	2000.22
23.76	126	1426.97
23.77	405	310.975
23.78	227	164.4
23.82	206	450.5
23.82	189	-72.525
23.92	78	4160.73
23.94	103	-265.175
23.95	288	67.65
23.96	180	5811.3
23.99	181	460.8
24.03	112	-106.125
24.04	75	8635.8
24.04	89	-3902.53
24.07	207	-539.9
24.07	151	-626.475
24.07	221	-797.625
24.08	228	-216.475
24.09	197	-496.8
24.09	172	-3821.82
24.17	188	94.2
24.34	218	378.95
24.41	288	22
24.46	217	2843.22
24.47	142	-22413.3
24.55	102	-6968.05
24.61	246	198.975
24.66	189	598.725
24.67	89	788.6
24.67	110	633.575
24.67	422	95.225
24.93	126	-44273.6
24.97	126	77745.8
25.13	218	679.825
25.14	148	4854.2
25.2	207	528
25.21	70	5898.52
25.21	127	1753.38
25.21	71	1144.47
25.21	246	526.75
25.22	126	19573.7
25.22	82	2764.43
25.22	245	1660.95
25.22	175	739.5
25.23	84	5146.48
25.23	94	502.375
25.37	100	337.8
25.42	120	359.075
25.42	255	269.05
25.43	70	2243.45
25.43	91	1009.83
25.44	131	4962.45
25.44	219	2675
25.44	60	2499.75
25.45	132	870.5
25.45	272	64.8
25.46	65	609.775
25.47	126	793.625
25.49	262	51.9
25.5	70	2323.75
25.5	114	817.275
25.56	60	1403.88
25.57	148	3362.28
25.62	296	82.5
25.62	521	55.725
25.79	151	390.625
25.87	139	141.075
26.06	106	3531.88
26.08	75	52328
26.09	101	4594.27
26.11	61	3885.32
26.12	405	68.4
26.28	78	2508.2
26.3	328	-1318.33
26.33	374	10192.6
26.34	416	69.6
26.35	78	2863.07
26.35	65	2444.43
26.35	93	1675.4
26.37	111	11812.6
26.37	62	2095.25
26.38	91	12069.9
26.39	101	88381.8
26.4	193	700.475
26.46	109	329.75
26.49	193	793.225
26.49	95	385.75
26.49	290	107.85
26.51	79	2930.53
26.52	155	613.9
26.52	122	117.55
26.55	255	304.6
26.55	183	268.85
26.56	225	180.2
26.62	274	6887.1
26.62	439	61.4
26.65	503	24
26.67	291	214
26.78	116	886.875
26.8	219	1954.4
26.81	135	755.4
26.82	77	4153.05
26.83	131	1894.15
26.86	78	548.875
26.92	72	2154.57
26.92	169	49.825
26.96	103	3948.88
26.98	218	621.6
27	309	35.475
27.1	466	31
27.19	183	517.65
27.23	147	3864.8
27.33	249	36.2
27.36	78	1100.17
27.38	306	222.225
27.39	78	2264.6
27.39	321	1042.78
27.39	106	819.65
27.39	130	575.725
27.39	233	112
27.43	93	1325.67
27.43	248	121.8
27.44	94	286.575
27.44	218	126.2
27.45	214	75.6
27.48	205	886.775
27.48	72	-213
27.49	255	73.575
27.49	169	56.975
27.56	93	2975.35
27.56	133	861.225
27.56	344	496.875
27.56	97	54.8
27.57	175	65.8
27.58	73	14916.2
27.58	119	122.975
27.59	84	669.2
27.59	80	87.3
27.6	123	75.6
27.61	174	666.475
27.61	226	56.575
27.62	154	87.675
27.67	446	33.2
27.71	123	-66.525
27.73	274	29.6
27.79	402	47.9
27.8	403	49.525
27.9	334	80.775
27.91	292	218.55
27.94	166	85.075
27.98	306	359
28.01	78	119.65
28.02	264	71.65
28.07	92	34.075
28.1	278	25.6
28.11	207	154.05
28.14	133	277.4
28.15	182	35.6
28.17	196	32.4
28.18	64	-67.775
28.22	117	369.575
28.22	87	84
28.23	174	1378.4
28.23	86	1086.9
28.23	100	563.9
28.24	172	549.975
28.25	173	176.775
28.25	121	32.575
28.26	154	11.2
28.27	93	33.45
28.3	168	25.8
28.33	320	43.2
28.36	243	-387.625
28.36	127	-620.8
28.37	120	-131.025
28.37	115	-1125.22
28.37	72	-4828.57
28.37	147	-37054.2
28.37	73	-237145
28.38	88	-363.775
28.38	145	-540.825
28.38	71	-814.275
28.4	75	14290.5
28.4	74	9935.2
28.4	150	256.8
28.41	72	2694.07
28.41	99	549.175
28.42	63	105.4
28.44	129	6302.5
28.45	73	126449
28.48	161	265.875
28.49	114	95.3
28.5	320	953.8
28.5	190	368.975
28.76	61	154.75
28.78	244	125.275
28.85	106	45.6
28.86	334	77.775
28.94	267	29.35
28.99	75	313.075
29.04	239	67.9
29.05	132	82.775
29.28	61	374.625
29.37	64	222.125
29.55	137	45.35
29.59	92	40.875
29.61	65	59.55
29.63	135	32.55
29.64	82	48.8
29.65	74	225.3
29.66	252	144.575
29.73	201	7.8
29.76	72	386.3
29.79	109	77.525
29.8	268	-782.65
29.9	395	189.375
29.92	104	76.075
29.92	63	50.6
29.95	181	31
29.98	72	1597.08
30	150	205.6
30.01	61	840.2
30.04	147	22829.4
30.04	242	129.675
30.05	228	80.9
30.06	121	-72.25
30.07	199	36.95
30.27	64	-97.025
30.3	519	23.125
30.31	153	21
30.32	81	277.325
30.33	316	109.2
30.34	105	476.2
30.34	134	287.075
30.34	169	194.05
30.34	230	162.05
30.34	160	129
30.34	311	53.725
30.35	73	41902
30.35	103	7351.05
30.35	74	3652.12
30.35	117	3263.3
30.35	89	1966.28
30.35	133	1868.1
30.35	149	816.8
30.35	128	298.225
30.36	217	2768.85
30.36	174	1578.78
30.36	204	844.125
30.36	61	667.85
30.36	96	182.15
30.36	241	96.125
30.36	305	90.4
30.36	287	75.325
30.37	191	488.65
30.37	207	423.45
30.37	192	92.925
30.38	219	267.675
30.38	109	124.8
30.39	143	521.275
30.39	272	78.225
30.39	165	66.1
30.41	73	33016.2
30.41	103	5048.27
30.41	174	4981.38
30.41	74	2806.82
30.41	131	708.875
30.41	102	652.75
30.41	204	473.55
30.41	116	257.525
30.41	113	127.825
30.42	133	1277.03
30.42	185	281.675
30.42	71	256.9
30.42	315	226.475
30.42	118	207.6
30.42	214	142.15
30.42	65	54.95
30.43	201	167.3
30.43	207	167.075
30.43	240	60.225
30.45	160	131.975
30.45	429	78.125
30.46	259	118.275
30.47	145	54.1
30.5	61	79.2
30.53	75	719.325
30.53	168	33.2
30.56	186	57.475
30.6	62	-37.625
30.69	78	42.45
30.7	100	28.4
30.73	270	182.775
30.73	246	101.475
30.73	327	82.15
30.73	330	66.675
30.73	535	46.3
30.74	146	2755.82
30.74	83	2005.83
30.74	60	785.6
30.74	96	313.875
30.75	66	745.825
30.75	71	558.025
30.75	125	242.975
30.75	319	188.9
30.75	106	176.275
30.75	211	147.85
30.75	165	137.725
30.75	417	38.8
30.76	91	389.725
30.76	208	111.025
30.77	76	1026.25
30.77	170	262.025
30.78	320	109.975
30.78	414	34.8
30.78	386	17.4
30.83	299	134.325
30.83	401	54.175
30.83	378	41.4
30.85	83	385.925
30.85	84	205.2
30.85	82	106.15
30.87	231	175.95
30.87	174	89.4
30.9	284	30.55
30.95	89	139.375
30.95	70	26
31.12	184	43.475
31.17	210	30.8
31.22	334	236
31.22	247	54.55
31.29	349	8
31.34	96	34.025
31.43	148	55
31.63	117	341.2
31.65	334	37.2
31.73	171	-52.125
31.77	63	59.35
31.81	60	162.175
31.82	119	141.125
31.82	68	118.275
31.84	71	148.85
31.84	134	134.15
31.85	157	133.525
31.85	343	18.6
31.86	111	108.85
31.9	67	-43.75
31.95	64	94
31.95	548	26.8
31.98	93	28.975
32	133	28
32.04	206	101.925
32.06	77	384.125
32.06	69	244.95
32.09	88	71.6
32.15	154	35.4
32.16	519	81.35
32.16	225	50.825
32.24	158	29.6
32.29	76	83.775
32.3	174	46.6
32.31	239	22.4
32.38	131	-200.725
32.39	109	270.6
32.39	170	264.6
32.39	249	231.975
32.4	75	15130.9
32.4	133	5166.68
32.4	67	389.275
32.4	208	176.55
32.41	255	71.45
32.41	137	48.275
32.43	172	106.4
32.44	106	89.4
32.44	270	35.875
32.45	211	51.8
32.46	89	231.9
32.46	227	54.4
32.47	307	99.4
32.48	179	59.075
32.5	225	80.925
32.53	108	26.2
32.54	155	105.325
32.54	200	53.325
32.56	269	33.4
32.59	74	366.75
32.59	79	57.125
32.6	78	53.225
32.62	129	249.9
32.7	96	67.325
32.83	96	51.85
32.92	73	1581.62
32.95	75	468.125
33.03	81	68.7
33.06	119	-50.125
33.07	260	481.6
33.12	188	49.3
33.17	148	26.875
33.18	133	267.225
33.21	260	42.85
33.21	173	28.525
33.24	60	74.6
33.27	183	32.8
33.29	117	539.5
33.29	103	416.4
33.29	217	259.425
33.29	68	63.875
33.3	69	117.1
33.31	81	57.95
33.36	217	-114.625
33.46	133	147.225
33.46	130	45.4
33.67	74	89.6
33.69	63	84.8
33.74	75	-316.125
33.76	73	3496.12
33.81	281	21.325
33.83	63	58.7
33.84	77	290.025
33.97	67	-70.825
34.06	64	51
34.12	78	104
34.15	74	280.75
34.19	183	197.2
34.29	169	158.95
34.29	214	140.425
34.29	70	31.85
34.29	93	17.4
34.32	75	-437
34.33	183	159
34.34	69	36.8
34.41	215	42
34.5	157	-41.875
34.6	76	142.8
34.72	207	-233.35
34.75	243	35.8
34.76	133	525.65
34.78	180	33.2
34.79	141	34
34.84	61	127.625
34.85	85	20.2
34.86	267	33.375
34.9	128	33.75
35.02	129	192.8
35.05	93	31
35.12	67	137.75
35.15	81	71.85
35.21	131	-178.75
35.22	65	57.8
35.22	72	-96.625
35.26	267	14
35.31	206	52.375
35.35	81	99.1
35.35	82	41.75
35.38	142	39.375
35.4	83	48.125
35.54	81	181.25
35.63	72	159.25
35.69	82	144.825
35.7	68	37.2
35.71	204	744
35.72	133	367.075
35.75	74	694.75
35.75	93	16.8
35.76	171	52.95
35.77	218	82.8
35.79	97	26.6
35.9	191	69.375
35.9	129	-170.5
36.35	289	79.15
36.37	147	8737.52
36.42	319	57.6
36.56	74	5794.65
36.56	207	1006.77
36.68	193	-2204.62
36.71	131	733.95
36.72	209	522.85
36.82	361	-280.175
36.89	148	564.775
36.9	147	5255
36.91	243	580.4
36.91	110	77.8
36.91	124	37.2
36.92	217	2489.4
36.92	68	71.775
36.93	271	124.525
36.96	204	3788.35
36.96	131	614.25
36.96	191	314.6
36.96	109	104.6
36.97	205	966.525
36.97	172	311.85
36.97	149	284.425
36.98	89	385.825
36.99	72	344.775
36.99	173	106.95
36.99	114	29.4
37	87	82
37.01	291	38.8
37.07	143	185.65
37.13	329	37.2
37.14	78	414.275
37.16	527	20.6
37.21	82	74.4
37.23	79	115.9
37.23	93	59.4
37.3	85	103.675
37.31	68	47.875
37.42	191	169.125
37.47	73	16958.7
37.49	131	92.4
37.49	143	40.85
37.5	81	63.125
37.54	101	1950.47
37.54	221	474.425
37.54	259	165.575
37.55	97	311.475
37.56	95	119.55
37.56	162	48.4
37.57	86	191.875
37.58	174	73.675
37.59	281	71
37.6	110	58.825
37.62	451	57.375
37.63	101	171.325
37.64	72	72.2
37.65	191	172.4
37.66	73	16947.3
37.68	137	50.175
37.69	288	40.2
37.7	190	27.6
37.72	221	96.175
37.73	148	107.4
37.8	118	48.825
37.84	70	57.8
37.86	97	43.55
37.87	223	28.6
37.89	361	560.05
37.89	169	141.275
37.89	89	133.925
37.89	86	91.4
37.89	149	53.95
37.9	72	55.6
37.91	117	214.575
37.92	74	350.975
37.93	363	69.675
37.93	104	48.2
38.06	355	99.025
38.12	295	92.2
38.13	281	364.2
38.13	137	75.375
38.16	76	708.3
38.22	105	565.725
38.23	274	18.8
38.24	211	24.8
38.28	193	125.975
38.28	271	88.8
38.28	112	34.8
38.3	71	-240.75
38.31	163	40.4
38.35	355	47.175
38.36	394	50.125
38.39	318	60.75
38.4	83	333.85
38.4	177	271.325
38.4	150	216.175
38.4	158	153.225
38.41	111	369.25
38.41	86	165.225
38.42	81	1307.15
38.42	113	589.9
38.42	85	496.675
38.42	207	486.475
38.42	118	425.6
38.42	70	375.45
38.43	148	1927.22
38.43	193	1106.72
38.43	221	500.7
38.43	109	471.025
38.43	139	188.525
38.43	345	82.25
38.44	135	531.475
38.44	100	217.075
38.44	65	162.7
38.44	93	77.85
38.45	179	60
38.47	174	83.6
38.48	288	18.25
38.5	194	149.225
38.5	181	99.15
38.5	146	85
38.56	191	122.2
38.6	362	109.725
38.61	252	130.575
38.61	387	46.825
38.63	307	86.2
38.65	203	2952.97
38.67	344	127.2
38.67	295	125.2
38.7	330	105.2
38.71	151	185.725
38.73	400	-72.2
38.75	65	134.3
38.76	386	40.6
38.78	355	50.6
38.83	64	176.775
38.88	317	64.175
38.9	190	359.35
38.9	153	131.3
38.91	151	92.075
38.92	114	130.5
38.92	199	84.95
38.92	276	54.85
38.92	210	42.8
38.92	435	23.2
38.93	180	27.175
38.95	268	79.875
38.98	318	68.475
39.02	73	30771.2
39.02	103	5322.4
39.02	229	227.4
39.03	147	5636.48
39.03	117	2220.88
39.04	61	318.825
39.04	390	96.65
39.08	127	227.95
39.09	73	5475.77
39.09	308	168.8
39.09	333	48.975
39.1	361	174.55
39.1	191	100.8
39.11	217	248.375
39.12	156	83.8
39.18	77	108.4
39.18	277	71.575
39.22	322	84.4
39.26	74	34
39.28	66	87.6
39.34	81	83.4
39.39	355	45.4
39.41	160	60.8
39.49	319	260.325
39.5	320	85.325
39.51	89	134
39.51	81	43.125
39.53	131	94.6
39.53	105	72.525
39.55	160	57.3
39.55	97	36.6
39.57	137	146.2
39.58	146	526.175
39.58	394	143.325
39.58	511	110.475
39.58	64	-98.625
39.59	159	508.875
39.59	193	460.6
39.59	88	307.775
39.59	164	123.9
39.59	289	119.525
39.6	129	11838.2
39.6	160	7577.35
39.6	131	3201.8
39.6	189	2882.07
39.6	163	798.075
39.6	84	584.225
39.6	480	277.65
39.6	165	120.625
39.61	269	154.3
39.61	140	117.575
39.61	179	80.05
39.61	450	54.175
39.61	599	34.425
39.62	166	62.65
39.62	285	28.875
39.69	84	81.375
39.7	189	89.275
39.72	147	723.325
39.74	361	73.575
39.75	479	62.325
39.77	218	47.2
39.78	155	52.6
39.87	64	-104.075
39.9	77	221.4
39.92	78	84.5
39.94	148	445.55
39.94	133	105.125
39.95	105	283.375
39.95	72	224.875
39.95	307	57
39.95	332	44.325
39.95	76	-61.875
39.96	133	1149.53
39.96	205	684.525
39.96	101	548.05
39.96	149	434.925
39.96	104	245.575
39.96	143	243.075
39.96	305	80.725
39.96	156	49.825
39.97	134	130.9
39.97	162	95.55
39.98	97	95.25
39.98	70	40.6
39.99	144	56.3
39.99	232	52.85
40.1	113	112.7
40.1	320	49.925
40.11	92	-30.5
40.12	267	29.7
40.18	69	41.55
40.31	61	138
40.43	77	289.5
40.48	193	52.25
40.5	64	123.125
40.53	133	179.8
40.68	85	26.05
40.71	77	317.75
40.82	79	-103.625
40.89	133	125.175
40.99	207	209.05
40.99	129	38.6
41	85	46.4
41.03	77	-251.25
41.08	75	763.45
41.11	85	44
41.13	193	147.85
41.22	77	165.75
41.22	134	14.6
41.25	96	123.075
41.44	193	68.125
41.45	75	373.975
41.64	77	343.45
41.65	100	89.85
41.79	208	-40.125
41.84	147	224.125
41.9	191	44.075
41.9	179	27
42.01	100	53.675
42.02	119	-26.25
42.04	61	145.4
42.04	96	121.275
42.04	207	118.725
42.12	61	110.775
42.19	208	-33.75
42.2	135	39
42.3	131	-68.775
42.3	79	-152
42.37	79	80
42.42	207	-145.125
42.48	147	610.2
42.5	179	20.2
42.58	191	76.875
42.62	81	73.2
42.86	79	-131.375
42.87	78	117.15
42.89	105	-111.25
42.91	63	85.95
42.93	97	35.2
42.95	75	243.35
43.04	77	454.4
43.05	197	38
43.07	76	-92.55
43.08	73	611.225
43.08	148	60.2
43.09	96	128.4
43.11	64	300.975
43.13	65	-36.375
43.27	63	61.95
43.29	78	129.275
43.4	115	40.4
43.43	103	111.675
43.45	75	695.175
43.46	147	648.925
43.47	281	-118.325
43.48	63	113.025
43.65	79	73.425
43.83	77	311.95
43.94	101	-39.75
43.96	96	63.8
44.01	208	-58.875
44.11	66	74.225
44.26	77	231.725
44.3	147	638.225
44.58	147	625.6
44.63	149	62.4
44.68	193	180.575
44.69	77	340.275
44.76	147	693.875
44.8	133	156.35
44.82	64	157.1

## Sheet: EE2 D18
All Metabolites				Increased Metabolites					Decreased Metabolites
RT (min)	EE2 - CTL	Mass		RT (min)	Mass	EE2 - CTL	Metabolites		RT (min)	Mass	EE2 - CTL	Metabolites
8.075	360.208	173		8.09167	70	12726.5	ethanedioic acid, 2 TMS		8.98417	175	-13360.8
8.08833	600.333	168		8.705	89	13190.8	carbamate		8.98583	70	-9344.21
8.09	359.083	238		8.86333	75	14462			9.91167	73	-43072
8.09167	12726.5	70		8.9025	147	56062.8			11.8483	98	-15623.2
8.095	173.625	270		8.94833	147	51665.5			12.54	64	-6557.88	2-Butenoic acid, 3 TMS
8.09583	87.5	123		9.055	148	11780.8	Propanoic acid, 2 TMS		14.4158	191	-6021.29
8.09917	248.917	151		9.0625	72	10291.2			15.765	248	-8524.62
8.115	249	150		9.11833	75	20832.8			15.7658	247	-59686.8
8.145	-77.5833	320		9.48167	147	77670.8	Acetic acid, 2 TMS		15.7667	76	-47802.6	2-Butenedioic acid, 2 TMS
8.19833	-293.875	91		9.78333	165	7772.33			15.7675	75	-673831
8.28417	2463.08	75		9.90083	70	7568.46			15.7683	73	-974035
8.44333	176.042	238		10.1708	1647.29	265	L-Alanine		16.9967	70	-917047
8.485	63.4167	199		11.1675	100	5887.17	Pyridine, 1 TMS		16.9975	188	-461555	Citrulline, 4 TMS
8.54917	61.4583	273		11.4167	72	8231.12	sulfate, 2 TMS		17.8375	75	-78591.9
8.59167	450.833	164		11.4442	73	75615.5			18.0508	83	-7166.17
8.6125	2176.21	61		11.9308	73	436290	Phosphoric acid, 2 TMS		18.0517	74	-301163
8.62	153.083	299		11.9317	221	55568			18.0533	86	-324444
8.62333	302.833	90		12.1283	224	7878.83			18.055	73	-2.25379e+06
8.69833	-906.333	101		12.1292	210	13137.6			18.0567	122	-13814.2	butanoic acid, 1 TMS
8.705	13190.8	89		12.1458	133	6714.83			18.0575	102	-480475
8.74833	2521.21	149		12.3217	74	8875.12	Ethanimidic acid, 2 TMS		18.0583	98	-11037.3
8.77833	1631.83	77		12.3225	73	108985			18.06	165	-5446.79
8.845	181.625	150		12.3233	77	18667.9			18.0767	174	-537783
8.86167	1675	90		12.4492	241	6378.83			18.3825	70	-8293
8.86333	14462	75		12.5517	192	16169.1	L-Valine, 2 TMS		18.52	115	-20899.5	DL-Malic acid, 2 TMS
8.9025	56062.8	147		12.755	77	6447	Pentasiloxane		18.5258	74	-19900
8.94833	51665.5	147		12.83	75	11389.2	Acetamide, 2 TMS		18.9575	116	-10834.1
8.98417	-13360.8	175		13.3883	75	6529.5			18.9725	147	-20498.5
8.98583	-9344.21	70		13.8317	147	22543.2	Silanol		18.9775	191	-16225.8
9.03167	2416.88	76		13.9942	75	303245	Glycerol, 3 TMS		19.1383	89	-6926.25
9.055	11780.8	148		14	116	30985.3			19.1408	73	-156140
9.0625	10291.2	72		14.0008	113	8858.88			19.6558	79	-10956.7	Benzoic acid
9.09833	212.583	91		14.2383	300	16211.7			19.86	73	-90394.1
9.1075	-87.25	145		14.2933	74	10960.6	L-Isoleucine, 2 TMS		19.9808	218	-6867.46
9.11833	20832.8	75		14.4258	147	38582.5			19.9825	132	-6413.54
9.1375	72.4583	217		14.62	89	6156			21.1842	72	-102286	Ornithine, 3 TMS
9.46417	147	175		14.6275	115	5459.17	Propanoic acid, 3 TMS		21.3542	219	-5944.96
9.48167	77670.8	147		14.6283	132	14228.5			22.3217	162	-7453
9.51333	505.833	132		14.6292	84	19641.7			22.8042	64	-14400.4
9.63083	1758.62	60		14.6308	85	7110.12			26.7817	73	-33975.3
9.65583	2388.29	85		14.6317	66	5726.08			27.7433	73	-14740.8	Inosose, 3 TMS
9.695	1248.12	101		14.6342	133	24449.7			28.6308	129	-39549.8	Hexadecanoic acid, 1 TMS
9.7375	485.5	240		14.635	70	20365.1			28.6317	75	-116701
9.76167	73.9167	97		14.6358	72	30322.1
9.78333	7772.33	165		14.6367	102	42056.3
9.82917	256.917	135		14.6375	77	247589	Glycine, 3 TMS
9.84	-2409.17	77		14.6383	73	305070
9.85	-1208.88	70		14.6392	155	14007.8
9.90083	7568.46	70		14.64	67	12350.1
9.91167	-43072	73		14.645	61	5012.38
9.95583	85.0833	126		14.6458	131	33840.9
9.97833	96.4583	172		14.65	75	20795
9.99333	121.792	143		14.6592	107	13203.5	Butanedioic acid, 2 TMS
10.0183	2836.17	72		15.1417	75	5910.38
10.0258	989	102		15.1617	77	5362.42	Propanoic acid, 3 TMS
10.0267	2558.38	70		15.3583	147	8759.29
10.075	28.3333	169		15.3667	84	8034.71	Pyrimidine, 2 TMS
10.0842	83.875	219		15.3675	68	7950.96
10.1367	35.1667	186		15.425	177	8763.54
10.1692	443.875	156		15.435	75	12629.2	Serine, 3 TMS
10.1708	1647.29	265		16.955	75	13414.4	L-proline, 2 TMS
10.1733	55.3333	337		17.0775	75	6053.71
10.1992	184.458	223		17.5825	186	5360
10.2108	675.417	195		17.7125	64	5522.67	L-Aspartic acid, 3 TMS
10.2892	-180.667	142		18.2317	64	26686.7
10.2958	682.958	132		18.34	77	8865.25	Butanedioic acid, 3 TMS
10.3058	800.417	105		18.7008	64	11823.4
10.3258	4811.67	99		18.8558	100	10025.3
10.395	1751.67	120		19.0525	68	12382.3
10.45	1852.5	165		19.0792	61	5824.33
10.545	-36.5417	290		19.2733	287	6494.54	L-proline, 2 TMS
10.585	534.208	239		19.2742	170	95403.8
10.5867	2149.96	94		19.54	170	5843.54
10.5917	768.167	189		20.4908	82	5665.62
10.63	157.5	96		20.4933	81	5327.46
10.6533	417.833	80		20.4942	174	12366.8
10.7425	366.167	131		20.4958	96	54670
10.8825	-611.708	68		20.6025	75	20203.8
10.9458	438.667	150		20.8717	172	80643.5
10.9867	54.9167	261		20.8725	117	47777.7
11.0208	105.75	244		20.8733	158	14885.3	Glutamic acid, 2 TMS
11.075	-437.083	199		21.3533	143	13074.2
11.1358	605.292	63		22.2775	75	289792
11.1675	5887.17	100		22.2925	210	7236.21
11.1683	4437	89		22.2933	147	1.63715e+06
11.18	29.1667	250		22.2958	133	647993
11.19	104.833	215		22.2975	87	44988.8
11.2483	-437.875	92		22.3183	238	253697
11.2492	145	316		22.3308	84	21177.7
11.2533	37.7083	379		22.3675	79	13249
11.3	453.417	165		22.4092	67	6280.75
11.3025	85.8333	187		22.4625	79	13386.9
11.3242	325.583	154		22.4792	150	5669
11.3908	116.708	111		22.4933	72	24846.3
11.4133	776.5	137		22.5275	147	85833.6
11.4167	8231.12	72		22.5375	75	62069
11.4225	212.958	68		22.5625	61	9979.21
11.4292	236	225		22.6283	131	8666.17
11.4442	75615.5	73		22.735	172	5228.54
11.4458	4113.12	191		22.7908	79	10370.2
11.47	64.7083	270		22.8125	74	15734
11.5292	878.125	214		22.8508	326	11935.2
11.5975	1663.83	139		22.9017	100	9732.5
11.6783	1121.04	167		23.0033	147	20215.1
11.8367	116.042	264		23.29	78	6018.83
11.8475	-1767.21	99		23.2908	106	10806.7	Methylmalonic monoamide, 2 TMS
11.8483	-15623.2	98		23.4583	73	13992.4
11.8625	-129.125	178		26.175	76	19319
11.8892	-57.25	260		26.1767	75	328315
11.9308	436290	73		26.1783	68	6437.12
11.9317	55568	221		26.1792	74	322774
12.0008	690.667	63		26.1808	86	23376.2
12.0133	2077.33	72		26.1825	89	186532	d-Glucose, 5 TMS
12.025	2556.5	131		26.1833	73	3.40865e+06
12.0258	1143.92	69		26.1842	83	48505.2
12.0342	99.2917	174		26.185	118	27531.7
12.0883	1102.08	129		26.1858	148	111545
12.125	959.583	137		26.1867	103	340285
12.1275	4629.54	136		26.1875	147	703954
12.1283	7878.83	224		26.1883	133	183146
12.1292	13137.6	210		26.1892	116	21505.5
12.1308	246	110		26.1917	204	56296
12.1317	-376.542	114		26.1942	84	16177.4
12.135	117.375	218		26.195	69	9794.54
12.1433	87.5833	223		26.1967	81	6196.21
12.1458	6714.83	133		26.1975	61	31256
12.155	-1040	243		26.6	147	10781.9
12.1775	286.542	191		26.8392	73	40869.2
12.1925	73.0833	192		30.1833	73	9075.79
12.195	1420.38	152		32.2675	73	5892.29	Glyceryl-glycoside
12.2175	659.833	82		32.305	73	21172.2
12.3217	8875.12	74		32.315	204	6360.62	Octasiloxane
12.3225	108985	73		33.0683	147	7218.29
12.3233	18667.9	77
12.3242	2842.62	191
12.3258	88.125	405
12.3308	87.9167	92
12.37	136.167	210
12.3967	1787.17	211
12.4142	3204.96	75
12.4358	483.208	195
12.4375	-2165.17	227
12.4492	6378.83	241
12.4875	-1787.54	89
12.54	-6557.88	64
12.545	2711.67	221
12.5458	1220.21	224
12.5517	16169.1	192
12.6508	229.708	244
12.6683	-793.917	201
12.6725	545.833	211
12.7225	848.208	152
12.755	6447	77
12.8217	1833.42	72
12.8283	1306	61
12.83	11389.2	75
12.8333	456.5	63
12.8358	1093	76
12.8567	103.542	210
12.8608	1095	131
12.8825	-1134.71	227
12.8858	1389.17	87
12.9775	467.625	221
13.0025	113.833	121
13.0058	-336.292	98
13.0292	418.625	107
13.0817	113.542	134
13.1192	212.375	181
13.3367	45.4167	216
13.3475	-31.875	371
13.3617	32.625	298
13.3883	6529.5	75
13.3933	1169.54	102
13.395	4854.12	192
13.3958	1044.75	134
13.3975	1159.08	63
13.4	509.833	114
13.4017	146.708	106
13.4067	441.458	84
13.4792	-50.75	144
13.5042	163.083	68
13.505	103.708	80
13.5142	212.25	113
13.5967	138.417	156
13.6383	32.625	114
13.7042	59.5417	165
13.8317	22543.2	147
13.8767	-28.25	387
13.9158	436	190
13.9725	36.5833	324
13.9942	303245	75
14	30985.3	116
14.0008	8858.88	113
14.1292	1265.5	63
14.1517	407.958	184
14.1525	427.5	92
14.155	819.917	96
14.1733	910.167	109
14.2033	925.5	120
14.2383	16211.7	300
14.2533	2789.29	225
14.2933	10960.6	74
14.4158	-6021.29	191
14.4258	38582.5	147
14.5192	2357.29	137
14.5783	1444.33	207
14.5858	3902.83	301
14.605	1025.83	188
14.6117	282.625	185
14.6142	766.458	285
14.6158	3125.5	144
14.62	6156	89
14.6217	3050.83	151
14.6233	75	199
14.6242	2619.71	149
14.6275	5459.17	115
14.6283	14228.5	132
14.6292	19641.7	84
14.63	381.875	169
14.6308	7110.12	85
14.6317	5726.08	66
14.6325	3682.67	225
14.6342	24449.7	133
14.635	20365.1	70
14.6358	30322.1	72
14.6367	42056.3	102
14.6375	247589	77
14.6383	305070	73
14.6392	14007.8	155
14.64	12350.1	67
14.6408	3978.79	161
14.6425	105.5	241
14.6433	1587.58	267
14.645	5012.38	61
14.6458	33840.9	131
14.6483	504.292	231
14.65	20795	75
14.6508	216.292	258
14.6542	325.75	196
14.6558	200.667	182
14.6583	229.208	230
14.6592	13203.5	107
14.6608	207.583	232
14.6642	3744	135
14.665	342.625	227
14.6675	307.75	281
14.6758	101.708	235
14.6792	110.292	234
14.6817	81.5833	219
14.6825	321.417	263
14.7117	174.875	214
14.8833	698.667	117
14.8983	623.333	81
14.9383	3740.29	211
14.9817	54	385
14.9983	286.792	195
15.0342	325.125	178
15.1417	5910.38	75
15.1433	80.375	173
15.1575	1900.12	100
15.1617	5362.42	77
15.1625	250.125	331
15.1633	237.875	172
15.1658	702.042	330
15.1983	407.333	66
15.315	-3049.88	74
15.3525	1052.38	117
15.3583	8759.29	147
15.3592	607.625	149
15.3617	1210.88	60
15.3625	4018.71	74
15.3667	8034.71	84
15.3675	7950.96	68
15.3683	3155.33	114
15.37	1542.83	71
15.3708	164.875	230
15.3733	250.167	63
15.4167	4974.46	77
15.4192	136.042	289
15.425	8763.54	177
15.435	12629.2	75
15.475	708.083	81
15.49	-771.875	156
15.5058	937.917	188
15.575	85.2083	64
15.5783	4791.83	147
15.6067	-210.208	177
15.6083	-486.083	69
15.6133	-461.375	76
15.6167	-393.042	89
15.7	393	99
15.7192	293.333	131
15.7542	-116.417	250
15.7642	-1463.67	249
15.765	-8524.62	248
15.7658	-59686.8	247
15.7667	-47802.6	76
15.7675	-673831	75
15.7683	-974035	73
15.77	-369.417	206
15.7858	-130.75	281
15.7917	192.833	206
15.8467	-2897.21	207
16.1458	-1126.96	71
16.1542	-311.625	205
16.1975	44	150
16.2425	203.333	174
16.2517	35.5833	137
16.2958	277.792	148
16.3133	175.958	88
16.3367	556.625	61
16.3392	51.7083	96
16.3408	395.292	72
16.3617	439.542	317
16.3742	54.6667	292
16.3875	-427.625	207
16.42	69.8333	80
16.4517	-36.625	341
16.485	91.5	108
16.5133	65.375	157
16.685	-40	412
16.6867	120.458	214
16.6908	744.292	101
16.6933	84.6667	174
16.8325	238.667	223
16.88	142.292	112
16.9008	1366.17	134
16.9025	111.792	226
16.9192	95.2083	231
16.9208	123.083	330
16.9267	275	118
16.9517	1450	76
16.955	13414.4	75
16.9567	1879.33	148
16.975	83.6667	168
16.9892	-99.125	179
16.9908	127.792	286
16.995	-926	120
16.9967	-917047	70
16.9975	-461555	188
17.0217	-101.708	92
17.0483	-132.958	181
17.0775	6053.71	75
17.13	-71.0833	141
17.1542	807.292	86
17.1825	-71.875	65
17.2008	-950.875	130
17.2325	620.042	148
17.2525	54.6667	245
17.3208	13.8333	169
17.4833	-3111	74
17.515	-31.625	290
17.52	-2114	96
17.5217	-982.875	186
17.5283	741.125	330
17.5375	-126.917	178
17.5492	-1046.21	83
17.5792	709.708	187
17.5817	3745.17	200
17.5825	5360	186
17.5833	4150.92	96
17.5933	867.417	97
17.5975	188.792	160
17.6142	169.042	151
17.615	453.792	81
17.6167	53.5833	429
17.6208	277.667	194
17.6233	4277.33	193
17.6242	914.292	105
17.625	861.667	355
17.7042	34.5417	242
17.7125	5522.67	64
17.7808	216.333	255
17.8	362.167	248
17.8375	-78591.9	75
17.8408	-132.167	220
17.85	1080.83	131
18.0508	-7166.17	83
18.0517	-301163	74
18.0533	-324444	86
18.055	-2.25379e+06	73
18.0567	-13814.2	122
18.0575	-480475	102
18.0583	-11037.3	98
18.06	-5446.79	165
18.0675	-2994.71	137
18.0683	-3198.79	107
18.0767	-537783	174
18.0783	-890.75	219
18.1733	406.917	286
18.2008	-95.0833	276
18.2317	26686.7	64
18.3042	192.708	258
18.3067	214.958	151
18.3083	1496.58	257
18.3133	184	172
18.3258	623.417	67
18.34	8865.25	77
18.3442	-294.958	217
18.3708	46.4583	415
18.3825	-8293	70
18.4592	-2194.12	88
18.52	-20899.5	115
18.5258	-19900	74
18.5575	142.833	238
18.5608	-92.375	353
18.5633	2846.21	193
18.57	-30	466
18.61	566.875	258
18.62	604.625	68
18.6442	809.333	105
18.7	-390.167	240
18.7008	11823.4	64
18.7383	-45.125	360
18.7542	-742.583	155
18.78	248.375	173
18.7867	26.5417	320
18.83	209.083	119
18.835	562.792	186
18.8558	10025.3	100
18.8567	102.708	175
18.8633	2350.96	68
18.875	-1106.54	104
18.8833	-520.167	189
18.8858	-1224.54	217
18.8867	-564.333	205
18.92	1612.62	101
18.9575	-10834.1	116
18.9725	-20498.5	147
18.9733	-338.875	81
18.975	-474.25	142
18.9775	-16225.8	191
18.9792	-370.625	217
18.9808	-93	111
18.9892	346.125	316
19.0175	-3818.79	148
19.0358	-721.792	111
19.0367	601.167	187
19.04	-466.167	215
19.0525	12382.3	68
19.0792	5824.33	61
19.09	2126.21	128
19.0917	2450.88	77
19.1042	-1081.75	171
19.1117	1237.62	149
19.1367	-1155.21	88
19.1383	-6926.25	89
19.1408	-156140	73
19.1533	1006	103
19.1617	-512.542	170
19.1642	252.208	112
19.1808	752.5	99
19.2733	6494.54	287
19.2742	95403.8	170
19.3383	2807.5	153
19.3692	1518.54	248
19.3883	4300.88	63
19.54	5843.54	170
19.6167	1568.38	71
19.6325	-219.667	168
19.6467	-409.083	167
19.6558	-10956.7	79
19.6658	-222.25	246
19.6992	-361.25	292
19.745	-1201.88	245
19.7458	-326.208	246
19.7742	-722.333	199
19.8008	-195.75	233
19.8275	735.75	69
19.86	-90394.1	73
19.89	134.708	238
19.9008	419.667	171
19.915	216.833	220
19.9442	312.583	268
19.9717	-55.1667	109
19.9808	-6867.46	218
19.9817	-1486.79	219
19.9825	-6413.54	132
19.9933	-109	122
20.0033	-103.958	92
20.0375	164.167	140
20.23	168.167	71
20.2483	845.542	202
20.2617	923.625	98
20.2733	-33.75	403
20.3508	2666.12	74
20.3683	165.667	244
20.4825	4235.67	71
20.4842	1904.17	67
20.4867	411.5	159
20.4908	5665.62	82
20.4917	4144.42	97
20.4933	5327.46	81
20.4942	12366.8	174
20.4958	54670	96
20.4967	709.5	316
20.4975	3246.04	80
20.4992	205.333	317
20.5017	413.667	104
20.5025	1737.33	69
20.5075	3778.42	79
20.5083	2089.58	83
20.5658	112.5	63
20.6025	20203.8	75
20.6283	110.208	152
20.6875	682.917	129
20.8717	80643.5	172
20.8725	47777.7	117
20.8733	14885.3	158
20.9325	472.625	123
20.9942	-1587.12	200
21.005	-4278	173
21.0167	90.1667	182
21.0358	1834.17	85
21.0525	3808	60
21.0633	1062.5	83
21.0858	612	190
21.1842	-102286	72
21.2558	45.6667	322
21.3533	13074.2	143
21.3542	-5944.96	219
21.3717	-483.625	182
21.495	1105.33	76
21.5108	528.833	104
21.5567	-1025.83	81
21.5917	-76.5417	226
21.6617	3550.92	139
21.7533	862.708	156
21.7675	52.625	257
21.805	738.75	94
21.8183	169.417	80
21.9225	1491.83	274
21.9492	-148.625	124
21.9833	45.5	152
22.2775	289792	75
22.2925	7236.21	210
22.2933	1.63715e+06	147
22.2958	647993	133
22.2975	44988.8	87
22.3183	253697	238
22.3217	-7453	162
22.3308	21177.7	84
22.3675	13249	79
22.4092	6280.75	67
22.4625	13386.9	79
22.4792	5669	150
22.4933	24846.3	72
22.525	636.167	144
22.5275	85833.6	147
22.5325	3716.17	113
22.5375	62069	75
22.5383	4696.17	76
22.5483	2639.17	119
22.56	2558.12	135
22.5625	9979.21	61
22.6025	237.167	200
22.6283	8666.17	131
22.63	1020.92	161
22.7033	1407.83	93
22.7342	-2297.88	85
22.735	5228.54	172
22.7583	410.25	95
22.7908	10370.2	79
22.7983	-116.792	342
22.8042	-14400.4	64
22.8125	15734	74
22.8142	-73.5417	355
22.8242	1932.29	98
22.8508	11935.2	326
22.8533	3789.04	66
22.8658	1564.67	87
22.9017	9732.5	100
22.9708	1140.96	87
22.9917	2273.67	188
23.0033	20215.1	147
23.11	-211.375	193
23.1283	1645.5	172
23.1308	-1166.75	160
23.1408	1562.21	72
23.2025	3487.42	79
23.2083	4350.62	147
23.2742	90.3333	435
23.2833	3342.58	129
23.2842	1919.67	77
23.29	6018.83	78
23.2908	10806.7	106
23.2942	91.3333	146
23.2983	119.708	159
23.3025	135.208	179
23.3083	823.333	69
23.3142	158.125	194
23.3225	98.8333	274
23.3517	354.708	69
23.3633	42.3333	184
23.37	-4937.58	64
23.4175	66	192
23.4383	48.6667	186
23.4475	-1001.96	207
23.4583	13992.4	73
23.46	-112.625	193
23.5225	-233.125	221
23.5525	124.333	117
23.5858	-57.2083	107
23.62	-84.875	205
23.6617	-169.792	209
23.6642	-598.958	386
23.6683	-168.5	179
23.6742	-237.917	221
23.7717	202	192
23.8975	-239.875	221
23.915	322.083	96
23.9175	288.042	134
23.94	78.0833	166
23.9475	799.792	206
23.9583	147.667	63
23.9592	106.958	240
24.1075	206.333	79
24.13	62.0833	232
24.3458	391.875	165
24.4442	806.708	144
24.5058	667.917	180
24.5433	287.125	93
24.6117	258.417	180
24.7517	30.4167	165
24.8342	115.708	111
25.0142	169.375	110
25.0183	281.75	68
25.1025	622.625	244
25.1725	53.6667	224
25.2225	-794.875	265
25.2342	381.625	220
25.2408	153.333	178
25.2442	100.042	310
25.28	186.542	144
25.2833	538.542	129
25.3067	696.583	72
25.4167	-70.75	78
25.4175	695.833	126
25.5	-31.25	401
25.5817	258.625	77
25.775	254.208	79
25.7942	-90.1667	112
25.8292	95.1667	149
25.8392	-66.5	110
25.9108	20.6667	431
25.9433	76.6667	94
25.9692	1235.96	60
25.9858	1280.62	148
26.0375	365.75	134
26.175	19319	76
26.1767	328315	75
26.1783	6437.12	68
26.1792	322774	74
26.18	3827.38	80
26.1808	23376.2	86
26.1825	186532	89
26.1833	3.40865e+06	73
26.1842	48505.2	83
26.185	27531.7	118
26.1858	111545	148
26.1867	340285	103
26.1875	703954	147
26.1883	183146	133
26.1892	21505.5	116
26.1908	2096.88	96
26.1917	56296	204
26.1925	1250	139
26.1942	16177.4	84
26.195	9794.54	69
26.1967	6196.21	81
26.1975	31256	61
26.2008	1979.88	78
26.2075	156.292	299
26.2825	1406.33	61
26.3508	2515.25	84
26.585	1708.54	160
26.5958	303	88
26.6	10781.9	147
26.6058	573.292	72
26.6067	636.875	116
26.6192	438.083	143
26.6233	202.042	114
26.6625	792.333	61
26.6833	324.542	84
26.7358	961.375	89
26.7817	-33975.3	73
26.8392	40869.2	73
26.9408	111.333	74
27.1925	50.3333	79
27.3617	38.3333	109
27.3625	317.583	106
27.3683	27.1667	122
27.3733	27.8333	165
27.4175	80.3333	82
27.425	74.0833	322
27.4358	32	167
27.485	67.1667	80
27.5125	117.333	67
27.5425	264.25	79
27.6025	-120.625	148
27.6983	57.1667	63
27.7033	269.875	77
27.71	206.833	221
27.7433	-14740.8	73
27.7508	-40.125	185
27.9133	-31.375	262
27.925	-507.042	74
27.9875	68	149
27.9908	121.208	131
28.1183	36.875	62
28.1258	16.3333	113
28.1717	-153.583	149
28.18	15.1667	174
28.2242	-64.125	145
28.63	-3782.12	119
28.6308	-39549.8	129
28.6317	-116701	75
28.6325	-2761.75	70
28.6375	-261.708	299
28.675	-308.458	149
28.685	-40.75	127
28.7208	628.833	77
28.7333	-233.083	66
28.7375	156.5	130
28.7875	-80.5	95
28.9025	33.3333	100
29.0225	-147.042	60
29.0367	-308.25	103
29.0908	134.667	96
29.1008	383.708	87
29.1017	277.583	205
29.4042	91.75	79
29.5042	154.5	131
29.5517	83.6667	77
29.5625	16	93
29.6575	30.625	100
29.9192	413.292	100
29.97	285.042	163
29.9942	485.417	61
30.0117	73.2083	63
30.0433	262.167	88
30.045	40.875	178
30.0475	160.667	175
30.0683	5.33333	279
30.1375	-625.458	74
30.1825	641.792	74
30.1833	9075.79	73
30.1867	139.417	208
30.3483	25	81
30.36	100	64
30.4942	218.542	147
30.5025	85.8333	64
30.5483	-123.125	64
30.8492	20.6667	217
31.0942	-131	71
31.1242	1481.75	281
31.1258	271.333	208
31.15	165.375	209
31.1533	341.458	282
31.1625	370.875	222
31.1733	-38.8333	153
31.2267	61.6667	63
31.2358	909.708	429
31.2892	-145.417	133
31.335	126.333	79
31.61	36.3333	223
31.6408	-137.375	101
31.6675	-164.125	116
31.7575	188.917	217
31.7825	174.583	77
31.8283	219.583	205
31.9	88.0417	79
32.0283	43.6667	74
32.0667	94.7917	60
32.18	105.042	76
32.1933	-460	207
32.1992	-453.25	74
32.2017	-64.25	355
32.2458	119.333	208
32.2675	5892.29	73
32.2717	58.125	355
32.2992	93	282
32.3042	261.875	130
32.305	21172.2	73
32.3108	505.083	149
32.3117	297.667	207
32.3125	1100.29	217
32.3133	1664.25	129
32.3142	1276.54	205
32.315	6360.62	204
32.3158	3943.17	103
32.3175	412.083	116
32.3183	317.625	189
32.3192	3249.92	147
32.32	450.708	337
32.33	57.4583	362
32.3408	42.4167	109
32.3592	91.9167	192
32.3642	127.583	134
32.3758	45.375	170
32.4142	24	100
32.4475	309	74
32.4692	54.5	64
32.47	24.1667	281
32.4925	182.958	133
32.595	-7.625	68
32.6617	23.6667	165
32.8492	22.3333	100
32.94	-249.875	148
33.0342	202.833	60
33.0433	181.583	193
33.045	126.792	115
33.0458	1033.88	148
33.0483	164.208	61
33.055	103.5	76
33.06	272.25	208
33.0642	75.4583	326
33.0683	7218.29	147
33.0692	1797.83	281
33.0733	212.583	357
33.0742	274.667	191
33.0783	450.875	131
33.0808	273.25	87
33.1333	417.083	282
33.1467	255.792	503
33.2233	96.9167	64
33.3858	62.8333	65
33.6892	38.8333	96
33.7225	116.167	76
33.9008	51.5417	79
33.9183	88.8333	61
33.9292	94.125	79
34.0058	111.5	77
34.265	29.3333	79
34.27	64.8333	119
34.605	113.083	74
34.74	1729.33	73
34.7458	47.1667	79
34.8308	-179	129
34.8325	-43.9583	218
34.8558	3626.46	147
34.8725	302.5	341
34.875	139.5	191
34.8758	136.708	103
34.8775	262.083	295
34.8783	149.333	503
34.8825	55.5833	461
34.885	1119.58	75
34.8875	93.375	60
34.9067	190.333	131
34.9192	91	296
34.9392	34.5	100
35.0983	-260.583	74
35.2192	79.125	79
35.3358	28.6667	165
35.3517	38.5	100
35.385	27	142
35.5233	18.0833	480
35.6758	148	167
35.6833	80.25	71
35.6975	-43.875	91
35.7583	-134.5	101
35.8167	-24.375	203
35.945	-192.708	295
36.0708	89.5	64
36.1658	-150.083	91
36.2633	117.375	64
36.2825	47.3333	100
36.3492	68	217
36.5508	406.5	148
36.585	18.6667	165
36.6683	85.5	76
36.7217	46.1667	63
36.7608	-17.875	232
36.8108	-20.875	160
36.8208	31.2917	150
36.875	352	74
36.8908	58.8333	79
37.0958	91.9583	79
37.1067	151.333	61
37.14	97.9167	79
37.265	1306.46	147
37.2942	64.8333	79
37.4825	1648	73
37.5858	109.417	76
37.6225	48.1667	135
37.6308	865.042	117
37.655	18	165
37.7475	20	165
38.0075	-111.125	131
38.0242	-53.75	105
38.0475	34.3333	221
38.15	-71.375	145
38.1633	-251.917	131
38.3967	48.5833	79
38.4142	1747.71	147
38.4342	-18.625	193
38.6492	44.8333	89
38.9825	930.167	147
39.03	-8	469
39.1842	53.8333	60
39.2958	-18.125	341
39.4758	919.625	147
39.5742	170.667	77
39.915	40.6667	76
39.95	87.5	100
39.9925	-806	73
40.0125	1245.5	147
40.0233	61	103
40.0642	31.9583	100
40.1508	39.3333	165
40.23	78.25	221
40.3125	54.2083	79
40.3725	368.125	75
40.7333	45.2917	208
40.745	292.333	64
40.7908	160	221
40.8483	20.6667	165
40.9217	-63.875	265
40.945	289.333	147
41.105	-1351.42	147
41.375	-30.125	129
41.4042	73.7083	100
41.46	97.9167	76
41.5392	-21.625	152
41.6117	1030.54	147
41.62	339.625	73
41.6267	110.167	148
41.7592	-283.958	66
41.7608	-1481.12	147
42.0067	103.375	79
42.0575	-46.5	65
42.0683	115.125	76
42.1158	93.0833	193
42.2317	-199.25	77
42.3058	81.5	100
42.37	-279.125	66
42.4858	73.8333	100
42.5183	162.75	76
42.65	59.8333	79
42.7	413	75
42.8075	74.4583	76
42.8883	-905	73
42.8958	70.5	79
43.2125	62.8333	91
43.3	81.6667	79
43.3917	60	62
43.3942	-136.75	74
43.4317	75	67
43.5458	75.3333	76
43.6217	64.125	79
43.6933	65.6667	87
43.695	85.9167	149
43.7317	142.708	207
43.8492	-270.167	66
43.94	-73.25	133
44.01	327	64
44.0425	66.2917	103
44.1033	602.375	73
44.1975	31	165
44.26	246.417	147
44.3158	83.0833	76
44.3883	278.833	64
44.4617	374.917	147
44.5483	-55.875	65
44.57	58.8333	100
44.6117	50.3333	103
44.7225	143.833	148
44.7467	125.917	79

## Sheet: Diphen D1
All Metabolites				Increased Metabolites					Decreased Metabolites
RT (min)	Mass	diphen - CTL		RT (min)	Mass	diphen - CTL	Metabolites		RT (min)	Mass	diphen - CTL	Metabolites
8.1575	75	71813.5		8.1575	75	71813.5			8.20083	155	-12302.3	Silane
8.16083	60	11026.5		8.33417	75	100626			8.25583	62	-4544.6
8.16417	155	7034.4		8.69417	77	271264			8.25833	65	-6754.25	Pyridine, 2,3,6-trimethyl-
8.175	97	698.95		8.695	73	625254			8.27917	75	-92372.3
8.17667	140	92.6		8.70167	89	60481.2	carbamate, 3 TMS		8.385	133	-5250.8
8.20083	155	-12302.3		8.71333	117	44420.1			8.49417	207	-7187.8
8.21583	171	-402.4		8.72583	174	175497			8.59417	145	-6400.7
8.2175	148	3549.35		8.80083	73	572202			8.59667	75	-9623.05
8.22	196	56.5		8.80333	207	149169	Pyridine, 3-trimethylsiloxy-		8.65833	60	-9705.6
8.24083	199	32		8.80667	72	319579			8.66083	89	-69407.6
8.2425	130	1863.6		8.82833	75	64573.7			8.7275	120	-8678.35
8.24333	129	5040.9		9.20333	74	27093.7	propanoic acid		8.73083	170	-5023.9
8.24667	148	2307.4		10.1217	148	35059.8			8.73333	78	-30329
8.255	104	-2508.05		10.235	74	97452			8.73417	77	-341774
8.25583	62	-4544.6		10.2433	75	155179	l-Alanine		8.735	147	-573562
8.25833	65	-6754.25		10.2442	61	40619.2			8.73583	73	-1.18487e+06
8.26417	72	1124.4		10.245	190	43822.4			8.7375	129	-5192.9
8.27583	123	-242.05		10.2475	117	133490			8.7425	117	-58315.4
8.27917	75	-92372.3		10.5317	147	66509.5			8.8275	131	-7778.9
8.28417	158	-667.7		10.5342	89	61551.7			8.82917	73	-404069
8.29417	196	-3405.9		10.5467	72	38447.7			8.83	148	-4117.6
8.295	131	825.1		10.5483	73	727376			8.85917	159	-5578.95
8.30083	97	59.25		10.55	116	165914			8.89333	77	-7623.15
8.30333	274	47.9		10.5517	75	84720.4			8.89417	154	-21943.5
8.30667	153	67		10.5583	79	37144.4			8.895	152	-459717
8.31083	198	-209.3		11.6775	73	257776			8.8975	71	-7541.35
8.31167	89	2013.15		11.6783	281	91650.7	sulfate, 2 TMS		8.9375	117	-31638.3
8.315	103	8563.9		11.7708	130	67315.8			8.93917	147	-29796.6
8.31583	101	7175.2		12.31	73	103775	Ethanimidic acid, 2 TMS		9.50583	66	-4398.8	Acetic acid
8.31917	129	12558.5		12.7283	74	58037.1			10.2833	99	-9466.75
8.32917	116	727.2		12.7292	73	485582	valine, 2 TMS		10.3242	73	-2.57447e+06
8.33417	75	100626		14.0725	117	219738	silanol		11.4817	100	-5720.15
8.335	84	-963.9		14.09	205	125033			12.3542	73	-65357.2
8.33833	162	339.3		14.0917	147	350725	glycerol, 1 TMS		12.3558	77	-13468
8.34417	119	18177.9		14.1142	218	57437.6			12.3567	100	-7834.15
8.3525	104	386.75		14.1283	131	42647.7			14.01	75	-167697	silanol
8.35417	120	19939.2		14.3417	73	81510.5	Glycine, 3 TMS		14.0558	89	-29386.9
8.355	173	-492.5		15.8683	75	32324.2			14.0575	147	-445953
8.35667	221	-127.8		15.8692	147	37775.8			14.0583	117	-282250	Glycerol, 3 TMS
8.37917	117	10247.5		15.8742	73	235791			14.0592	101	-53479.9
8.38	78	1041.25		15.8783	188	91747.2	Serine, 3 TMS		14.0608	66	-22353.6
8.38083	106	3732.25		15.8792	100	133412			14.1467	71	-4394.1
8.38417	161	-1444.95		15.9317	74	76555.4			14.2467	103	-7923	L-isoleucine
8.385	133	-5250.8		16.4817	74	54041.7			14.2642	73	-116425
8.38583	79	18462.8		16.4825	73	451967	L-threonine, 3 TMS		14.6567	73	-114194
8.38833	94	569		16.8808	73	42783.6	l-aspartic acid, 2 TMS		14.6575	77	-74120.2	3-Pyridinecarboxylic acid, 1 TMS
8.4	100	-2846.7		18.2592	218	32369.7	pyruvic acid???		15.5567	73	-52833	2-butenedioic acid
8.40417	72	1347.6		18.2667	70	322262			18.13	89	-6990.65	Butanoic acid, 3 TMS
8.40583	116	894.45		19.4167	148	33612.2	L-Proline, 2 TMS		18.4208	74	-18546
8.4125	70	1493.5		19.4175	74	128959			18.425	73	-148619	Butanedioic acid, 3 TMS
8.41417	122	1276.5		19.4192	73	1.18411e+06			18.4258	61	-10791
8.41833	108	184.5		19.4292	130	32142.6			18.7042	64	-13153
8.41917	158	1416		19.4408	156	825558	2-Piperidinecarboxylic acid, 2 TMS		19.8683	72	-5618.2
8.42167	119	606.5		19.4442	84	37558			20.9225	73	-274218	2-Piperidinecarboxylic acid, 3 TMS
8.42333	179	-126.45		19.4858	230	66852.7			21.2933	68	-5971.7
8.42417	130	2243.9		21.2317	74	125895	Glutamic acid, 3 TMS		21.3592	219	-5051.6
8.43417	77	-2244.8		21.4608	73	102042			22.2575	173	-20347.1	aminoethanesulfonic acid, 3 TMS
8.44667	82	-1220.75		21.62	73	71622.6	Silanamine		22.29	134	-41369.9
8.45167	113	-572.7		24.3833	73	73583.9	ethanedioic acid		22.3183	175	-77116.1
8.45833	121	14798		25.7708	73	50555.3			22.3283	160	-67470.7
8.46417	130	-2808.65		26.0758	73	34060	á-Hydroxypyruvic acid (pyruvate derivative)		22.3533	238	-107534
8.47	221	146.25		27.095	73	44659.4	Ribitol, 5 TMS		22.3625	101	-41193.8
8.47333	155	-2647.55		29.28	73	286066	Myo-Inositol, 6 TMS		22.3642	87	-30830.2
8.47917	209	42.5		29.7358	74	161995			22.4008	130	-218866	taurine
8.48	207	1655.75		29.7367	73	1.71524e+06	inositol, 6 TMS		22.4558	327	-211072
8.4825	115	293.25		29.7375	217	168786			22.7583	84	-4539.2
8.49	80	-865.5		29.7383	75	150014			22.81	131	-4542.85
8.4925	208	-1290.6							23.1958	117	-6352.25
8.49417	207	-7187.8							23.2967	106	-6048.8
8.495	191	-770							24.5308	75	-11350.2	1,2,3-Propanetricarboxylic acid
8.49583	299	-470.45							24.8317	129	-9422.5	DL-Ornithine
8.49667	193	-346.3							28.6567	118	-5117.55
8.49833	192	-103.25							28.6575	117	-52116.8
8.5075	95	-357.6							28.6583	75	-65106.9	Hexadecanoic acid, 1 TMS
8.51417	118	380.75							28.6592	69	-7218.65
8.51667	188	407.55
8.52	103	111.9
8.52417	179	152.35
8.52833	185	35.5
8.53167	87	130.5
8.53333	126	-264.65
8.53917	168	-522.5
8.54333	140	-78.1
8.555	169	257.8
8.56167	185	215.5
8.5625	111	1911.7
8.59083	81	4865.05
8.59167	101	-676
8.5925	146	-751.15
8.59417	145	-6400.7
8.59667	75	-9623.05
8.5975	216	23
8.60167	99	-493.6
8.60583	143	-651
8.61083	89	7294.25
8.61333	155	1964.5
8.62417	184	15.5
8.62583	186	1236.1
8.62833	201	111.4
8.64083	96	548.6
8.65833	60	-9705.6
8.66083	89	-69407.6
8.6875	187	209.25
8.68833	245	555.05
8.68917	244	3442.75
8.69083	69	12397.6
8.6925	70	17650.5
8.69417	77	271264
8.695	73	625254
8.69583	66	7908.05
8.69667	242	56.6
8.70167	89	60481.2
8.71083	146	3725.15
8.71333	117	44420.1
8.7225	104	14354.8
8.725	175	29705.8
8.72583	174	175497
8.7275	120	-8678.35
8.73083	170	-5023.9
8.73167	157	1265.75
8.7325	67	-3064
8.73333	78	-30329
8.73417	77	-341774
8.735	147	-573562
8.73583	73	-1.18487e+06
8.7375	129	-5192.9
8.7425	117	-58315.4
8.74333	120	4727.25
8.75333	108	1598.35
8.7575	248	1153.15
8.76917	85	7382.55
8.77167	71	18848
8.785	123	4166.95
8.78833	243	75.5
8.79083	120	6523.45
8.7925	163	4412.15
8.79583	140	716.7
8.79667	165	2772.1
8.8	60	8037.85
8.80083	73	572202
8.80167	134	5421.95
8.80333	207	149169
8.80417	161	2138.25
8.80667	72	319579
8.80833	64	1477.2
8.80917	125	1149.25
8.81667	170	2709.75
8.8225	95	1550.6
8.825	121	-3008
8.8275	131	-7778.9
8.82833	75	64573.7
8.82917	73	-404069
8.83	148	-4117.6
8.83083	61	20461.8
8.83167	160	-851.6
8.83417	68	5558.8
8.8375	311	13.3
8.8475	84	-2037.1
8.85583	174	-736.9
8.85917	159	-5578.95
8.8875	95	10384.9
8.89167	159	6157.75
8.89333	77	-7623.15
8.89417	154	-21943.5
8.895	152	-459717
8.8975	71	-7541.35
8.90083	89	10637.1
8.90833	112	-3263.4
8.91167	145	263.75
8.91333	118	2106.6
8.91417	117	18680.5
8.91667	160	798.5
8.92	140	-307.35
8.92167	209	355.65
8.92583	207	2905.65
8.92917	77	6443.65
8.93	170	1048.4
8.93583	148	-3782.2
8.9375	117	-31638.3
8.93917	147	-29796.6
8.945	112	2868.65
8.955	81	17793
8.9575	163	46.15
8.96333	128	261.5
8.96667	126	2264.9
8.975	157	-269.9
9.04167	97	488.5
9.05583	72	-4087.3
9.07167	81	1478.9
9.08417	135	3051.8
9.08583	61	3219.4
9.0875	105	21759.2
9.08917	73	42277
9.09	69	4422.55
9.09167	174	531.35
9.1	146	389.15
9.10083	91	1892.6
9.10333	134	1287.45
9.105	75	8948.65
9.10583	97	3576.75
9.1075	151	7354.75
9.10833	150	231.55
9.10917	155	10180.8
9.11083	74	6899.65
9.11167	321	414.75
9.1125	106	3013.7
9.11417	107	1664.65
9.115	98	1603.5
9.11583	87	3501.75
9.11667	178	5981.55
9.1175	189	1761.45
9.12917	171	107.1
9.1425	226	5482
9.14667	219	23.7
9.16417	112	23.25
9.18667	164	64
9.19083	155	590.1
9.1975	64	69.2
9.2	127	524.55
9.20167	91	967.45
9.20333	74	27093.7
9.20833	247	-425.9
9.2175	117	2933.8
9.22417	141	111.35
9.23083	254	171.9
9.2425	77	-1962.2
9.24333	174	23641.5
9.2525	103	-1518
9.26	149	-1330.75
9.31917	86	-600.9
9.36083	64	-613.4
9.42083	103	14656.9
9.42167	222	7281.25
9.43583	245	11.25
9.43917	145	239.5
9.44667	265	707.95
9.4475	223	3799.8
9.44833	224	561.7
9.45167	135	754.7
9.4525	163	311.95
9.45333	119	2175.4
9.46667	107	124.45
9.46917	221	29353
9.47	207	792.8
9.47417	192	173.7
9.4775	164	71.95
9.48167	286	-21.5
9.50583	66	-4398.8
9.52667	186	37
9.5425	239	36.9
9.58583	154	142.25
9.59333	131	1315.3
9.6625	267	-32
9.685	241	-36.1
9.69167	181	76.75
9.69333	122	-368.45
9.7125	177	5666
9.7225	124	-126.65
9.7725	81	198
9.78417	133	1985.2
9.79167	95	333.6
9.79667	74	2764.65
9.79917	134	216.95
9.80333	77	9140.6
9.80833	83	-420.35
9.82	106	326.75
9.82333	64	-2743.5
9.82583	97	337.25
9.82917	179	102.35
9.83	318	2465.4
9.83583	195	109.25
9.8525	137	81.75
9.86083	119	1099.7
9.86417	117	3383.95
9.87667	225	4763.15
9.87917	178	385.65
9.88	248	53.1
9.88583	207	91.1
9.8925	116	15957.4
9.90333	147	2514
9.91667	178	45.2
9.9275	154	22.4
9.94667	175	27
9.96333	74	3939.8
9.96583	190	589.1
9.9675	88	175.2
10.0217	132	256.55
10.0233	133	662
10.0342	139	115.95
10.0392	60	1038.45
10.0642	147	18829.3
10.0742	242	73.55
10.1217	148	35059.8
10.1558	165	1645.5
10.1817	242	16
10.1875	318	13
10.1883	207	92.5
10.1925	297	17.35
10.1967	225	6.55
10.2175	330	8.85
10.2208	129	3404.65
10.235	74	97452
10.2383	105	5256.2
10.24	131	21201.8
10.2417	149	19293.3
10.2425	144	3748.35
10.2433	75	155179
10.2442	61	40619.2
10.245	190	43822.4
10.2467	128	17545
10.2475	117	133490
10.2533	221	642.9
10.255	146	3261.05
10.2617	266	126
10.2642	202	230.25
10.2833	99	-9466.75
10.2992	155	1479.25
10.3242	73	-2.57447e+06
10.3683	239	35.25
10.4083	88	705.7
10.4142	69	2704.5
10.435	191	96.8
10.465	133	3771.9
10.4658	146	2632.05
10.4667	69	-3782.9
10.47	85	-3226.5
10.4867	100	11955.9
10.5092	96	4864.4
10.5125	366	-23.5
10.5175	125	378
10.5225	86	2763.5
10.5242	93	4190.85
10.5258	182	271.05
10.5267	155	450
10.5292	140	766.4
10.53	65	2226.35
10.5308	189	1040.8
10.5317	147	66509.5
10.5325	92	1588.65
10.5333	131	7683.25
10.5342	89	61551.7
10.535	156	69.2
10.5375	250	-341.25
10.5392	249	-1572.15
10.545	88	5424.35
10.5467	72	38447.7
10.5475	120	22804.9
10.5483	73	727376
10.5492	117	21154.2
10.55	116	165914
10.5508	90	7551
10.5517	75	84720.4
10.5525	107	1748.8
10.5542	91	18277.7
10.555	84	1867.85
10.5567	68	888.45
10.5575	180	131.25
10.5583	79	37144.4
10.5592	238	59
10.5608	262	174.85
10.5642	184	622.45
10.5683	98	412
10.57	178	352.85
10.5717	113	4130.7
10.5742	99	6683.15
10.5767	118	8220.7
10.5792	101	4672.75
10.5808	82	1483.35
10.5817	201	317.3
10.5833	149	4292.6
10.5842	226	50.15
10.5892	203	72.95
10.6683	68	303.1
10.7483	258	48.5
10.7842	89	99.75
10.8117	69	123
10.8442	218	669.25
10.845	68	64.6
10.8458	219	119.6
10.8492	318	6.25
10.855	84	345.5
10.8733	159	19.3
10.8783	85	93
10.8883	267	126.8
10.8942	70	224.45
10.9275	78	-3673.35
10.9617	146	-328.8
11.0375	93	340.2
11.0542	69	1274.6
11.0583	243	50.35
11.0867	233	258.5
11.0875	313	45
11.14	83	-1102.45
11.1458	251	27.4
11.1692	288	54.05
11.1992	130	389.4
11.2033	75	10814.8
11.2042	64	254.5
11.2467	67	802.1
11.2833	176	127.65
11.2842	140	63.9
11.2942	151	760.15
11.295	63	769.7
11.2983	278	566.15
11.2992	100	4017.85
11.3008	166	84
11.3125	179	14
11.3183	86	1107.45
11.325	111	136.3
11.3317	120	428.05
11.3367	148	1097.25
11.3375	191	233.25
11.3392	67	755.4
11.3408	281	933.25
11.3458	325	128.15
11.3483	284	43.05
11.3492	75	1594.25
11.3508	283	150.6
11.3517	282	253.85
11.3592	106	117.9
11.3608	110	27.25
11.3642	147	6907.4
11.3692	71	412.4
11.3758	151	160.2
11.3917	171	337.5
11.3925	216	173.15
11.3933	393	28.85
11.3958	217	23.75
11.4058	209	119.2
11.4192	207	939
11.4225	208	176.5
11.4233	337	61.5
11.4242	114	573.45
11.4325	76	378.95
11.4342	151	56.05
11.4367	177	41.15
11.4417	131	875.3
11.4542	67	292
11.455	150	320
11.4567	130	467.6
11.4592	115	1775.7
11.4617	250	22.7
11.48	392	4350.35
11.4817	100	-5720.15
11.4933	279	25.95
11.4967	338	33.6
11.5092	185	12.15
11.515	239	39.2
11.5208	246	-106.75
11.5225	311	9.35
11.525	112	13.05
11.5333	251	143.45
11.5375	100	1041.95
11.5425	264	63.05
11.5442	207	5292.75
11.545	393	1946.9
11.5458	256	68.75
11.5958	209	315.05
11.6233	118	815.2
11.6242	373	37.75
11.6458	318	12.45
11.6658	173	241.9
11.6675	297	32.45
11.6683	258	154.3
11.6692	277	236.4
11.6775	73	257776
11.6783	281	91650.7
11.68	263	307.2
11.6817	256	111
11.6825	201	274.55
11.6842	354	207.1
11.6875	234	200.05
11.6883	273	139.85
11.6908	321	163.7
11.6942	196	169.85
11.695	278	99.15
11.6975	224	114.35
11.6992	262	107.05
11.7008	109	173.65
11.7083	305	63.3
11.7442	210	154.9
11.7483	139	827.75
11.76	66	19611.6
11.7708	130	67315.8
11.7717	128	606.5
11.7742	176	33.85
11.7758	109	165.35
11.7808	369	12.55
11.785	330	47.35
11.7892	172	1191.75
11.7917	219	253.45
11.7967	229	-840.4
11.8075	188	290.3
11.835	231	103.65
11.855	145	48.75
11.8633	171	99.25
11.8692	173	30.5
12.0633	121	312.25
12.0842	147	11705.5
12.1408	261	17
12.1433	208	11.5
12.1483	242	1014.25
12.1767	102	367.75
12.2875	96	269.65
12.2883	211	-1158.05
12.31	73	103775
12.3517	103	-2206.65
12.3542	73	-65357.2
12.355	168	-2918.6
12.3558	77	-13468
12.3567	100	-7834.15
12.3575	135	-1176.4
12.3742	218	281.85
12.4117	117	-1514.35
12.4125	82	1304.9
12.4317	211	-1502.85
12.4617	145	174.6
12.465	218	133.8
12.4908	211	-566.95
12.5425	364	12.85
12.6525	221	233.45
12.7167	193	101.25
12.7267	90	533.3
12.7283	74	58037.1
12.7292	73	485582
12.73	156	12545.9
12.7542	65	900.7
12.7675	126	494.8
12.815	142	267.85
12.8158	69	1537.2
12.84	84	7927.4
12.8708	63	172.3
12.8875	76	666.5
12.91	80	198.35
12.9233	221	82.85
12.9333	185	42.1
12.965	242	-845.65
12.9658	108	-184.1
12.9983	94	65.45
13.0183	119	786.85
13.0958	82	948.35
13.1025	172	86.9
13.2392	111	47.5
13.265	160	251.7
13.3125	188	450.95
13.3133	159	621.05
13.3667	196	-117
13.3767	151	-471.4
13.385	191	89.95
13.3908	106	70.95
13.4092	68	1967.45
13.4517	92	345.1
13.4575	89	711.5
13.4658	141	113.8
13.4767	102	56.95
13.4775	85	1974.55
13.4783	188	52.7
13.4833	101	281.2
13.4842	84	424.2
13.4858	114	224.45
13.4867	123	150.4
13.4875	144	92.2
13.4925	118	146.45
13.4967	174	294.3
13.5025	176	50.55
13.5125	151	262.65
13.515	67	359.6
13.5267	68	-116.7
13.5292	188	130.5
13.53	313	24.05
13.5908	65	-339.85
13.6042	120	32.75
13.6708	115	-98.15
13.71	117	-399.8
13.7392	82	103.35
13.7483	96	110.35
13.75	200	27.55
13.7617	98	2464.45
13.8083	160	61.6
13.8167	243	19.5
13.8392	93	29.5
13.8467	137	70.2
13.8617	161	66.15
13.8775	220	30.45
13.9092	196	22.5
13.91	209	16
13.9425	150	146.15
13.9458	228	6.25
13.9733	391	-40.4
13.985	231	-1548.5
13.9858	335	-980.3
13.9883	247	-436.7
14.01	75	-167697
14.0442	247	116.55
14.0558	89	-29386.9
14.0575	147	-445953
14.0583	117	-282250
14.0592	101	-53479.9
14.0608	66	-22353.6
14.065	69	-2955.25
14.0708	130	6037.75
14.0725	117	219738
14.0783	94	538.25
14.0875	127	233.5
14.09	205	125033
14.0917	147	350725
14.1025	69	3857.15
14.1042	100	8523.1
14.1108	142	926.2
14.1125	78	2427.65
14.1142	218	57437.6
14.1158	111	1092.75
14.1242	219	691.75
14.1258	218	3221.45
14.1283	131	42647.7
14.145	85	-2666.85
14.1467	71	-4394.1
14.1475	249	33
14.205	177	-2001.3
14.2467	103	-7923
14.2642	73	-116425
14.2783	296	64.85
14.3017	117	-3411.05
14.3108	227	-1164.75
14.3142	210	-677.9
14.3167	298	-2076.8
14.3275	87	1129.75
14.3367	117	2395.5
14.3417	73	81510.5
14.3992	102	-1651.1
14.4483	506	3.75
14.4925	92	156.45
14.4975	196	163.5
14.5008	79	5927.45
14.5167	416	8.75
14.5175	95	601.8
14.52	379	8.75
14.5217	78	1392.8
14.56	267	288.85
14.5633	355	67.4
14.5667	249	38.9
14.5692	281	106.3
14.5708	357	26.45
14.575	399	58.75
14.6033	75	7199.75
14.6083	62	359.1
14.6133	203	620.15
14.6567	73	-114194
14.6575	77	-74120.2
14.7158	66	10168.8
14.74	137	-2792.9
14.7467	269	482.8
14.76	183	-661.6
14.7667	151	806.75
14.7742	207	3121.65
14.7767	80	456.4
14.7842	67	877.65
14.7942	387	34.25
14.8142	190	41.2
14.8192	434	-61.4
14.8375	230	76.65
14.8717	251	190.6
14.8792	136	5352.75
14.8825	77	8164
14.8883	63	1193.2
14.9092	198	27.4
14.925	300	2913.5
15.0792	63	613.1
15.08	113	237.25
15.0825	89	1111.35
15.1258	95	277.85
15.1292	110	29.45
15.1408	105	448.7
15.1875	216	6.45
15.19	176	18.5
15.2	79	4516.1
15.2083	99	440.3
15.2283	67	775.4
15.2308	80	228.75
15.2567	160	44.8
15.265	314	1237.5
15.3042	62	45.75
15.3058	135	973.8
15.3208	298	-1028.7
15.3358	278	-192
15.3375	263	-511.4
15.395	204	117.7
15.3992	77	-1238.55
15.4242	121	391.4
15.4292	442	31.15
15.4367	281	741.75
15.4383	221	2118.35
15.4542	267	976.8
15.48	443	253.75
15.5408	219	-27.1
15.5483	211	-2436.9
15.5567	73	-52833
15.5575	77	-3568.8
15.56	119	-299.75
15.5617	103	-1471.5
15.57	93	501
15.5817	148	311.6
15.5883	211	-2164.65
15.5933	154	44.5
15.5967	144	54.5
15.6033	143	218.05
15.605	304	4.25
15.6642	300	1803.75
15.6808	132	527.85
15.72	206	91.5
15.7225	93	652.4
15.7258	255	679.55
15.7292	197	124.05
15.7383	279	17
15.78	204	4030.85
15.7875	251	17.25
15.8392	224	204.05
15.84	445	295.2
15.8417	323	279.9
15.8425	266	141
15.85	81	310.6
15.8508	269	530.15
15.8525	223	1037
15.8533	221	6409.95
15.8542	145	511.25
15.8658	85	2630.85
15.8683	75	32324.2
15.8692	147	37775.8
15.87	339	214.55
15.8717	191	3388.4
15.8725	149	3196.25
15.8733	148	7347.15
15.8742	73	235791
15.875	74	25942.7
15.8758	60	8143.45
15.8767	134	4120.05
15.8775	133	27404
15.8783	188	91747.2
15.8792	100	133412
15.88	130	8451.4
15.8808	291	927.85
15.8858	86	4158.95
15.8967	63	187.75
15.8975	233	196.35
15.9017	373	13.25
15.9042	199	208.3
15.9075	78	359.3
15.9208	126	303.3
15.925	97	301.35
15.9258	340	670.1
15.9275	112	620.45
15.9283	165	687.6
15.93	222	980.95
15.9308	308	1298.65
15.9317	74	76555.4
15.935	84	5331.25
15.9383	95	387.3
15.9433	231	596.25
15.9508	554	8.5
15.9525	258	17.25
15.9542	64	865.8
15.9758	281	75.2
16.02	280	28.25
16.0558	60	203.65
16.0858	151	51
16.0992	93	74.15
16.1058	208	57.5
16.1192	314	314.2
16.1233	221	127.85
16.1242	83	43.75
16.1275	312	7
16.1292	96	61.45
16.1367	218	293.55
16.165	68	-85.1
16.1817	218	439.45
16.19	61	-92.5
16.255	348	1.5
16.2683	81	38
16.2692	218	251.8
16.2817	60	407.55
16.2833	86	222.4
16.2892	71	858.55
16.2933	61	543.1
16.3058	116	2379.55
16.3083	69	144.95
16.3092	103	2036.25
16.3117	174	2478.05
16.3125	160	4552.25
16.3142	234	300.05
16.33	72	453.3
16.3408	86	371.6
16.3608	190	226.2
16.3717	213	188.1
16.375	175	60.85
16.3775	160	1006.7
16.405	86	535.85
16.4225	143	102.85
16.4775	124	147.5
16.4817	74	54041.7
16.4825	73	451967
16.4842	116	17959.7
16.49	108	70.25
16.5083	155	139.25
16.5133	296	107.55
16.515	269	47.2
16.5442	187	91.35
16.5567	269	607
16.5592	158	660.15
16.5725	88	327.45
16.5783	253	130.05
16.5817	60	1081.95
16.5867	130	1522
16.5933	101	6970.6
16.5942	132	1414.2
16.5975	218	2683.8
16.5983	219	3974.75
16.5992	74	3799.4
16.605	105	108.25
16.6067	246	103.9
16.6092	91	176.3
16.61	98	272.75
16.6125	89	1037.7
16.62	202	451.1
16.6233	100	4514.85
16.6317	174	2535
16.6325	145	-667.8
16.6358	84	4951.1
16.6392	131	1222
16.6458	243	40.75
16.6533	248	38.85
16.6542	277	51.7
16.6558	104	316.9
16.6567	300	476.55
16.6608	486	3.25
16.6667	267	52.75
16.6833	149	-178.9
16.705	75	1374
16.7408	150	91.4
16.7625	146	321.05
16.7642	94	2.25
16.8408	242	48.6
16.845	200	30.7
16.8625	60	1868.05
16.8708	183	62.95
16.8758	72	1782.3
16.8775	62	387.5
16.88	86	2524.55
16.8808	73	42783.6
16.8825	144	1827.5
16.8833	102	2020.75
16.8942	174	696.7
16.895	146	232.3
16.8975	69	750.15
16.8983	70	4779.2
16.9	71	1310.9
16.9017	61	4121.1
16.9042	191	726.5
16.9058	76	1593.25
16.9083	160	14838
16.91	116	20024
16.9108	234	658.15
16.9125	162	707.15
16.9133	262	2601.65
16.9142	94	776.5
16.915	150	203.65
16.9175	63	-141.45
16.9183	190	3809
16.9217	84	441.3
16.9258	187	142.15
16.9283	304	11
16.9317	170	68.55
16.9442	74	5339.85
16.9842	183	58.75
16.9883	425	10
16.9892	206	65
16.9933	219	1410.75
16.9942	220	321
17.0017	159	306.5
17.0067	178	36.9
17.0283	257	50.2
17.0692	134	-210.85
17.0825	190	-283.55
17.0842	85	-536.8
17.0883	211	-464.15
17.1325	64	585.5
17.1625	267	-79.25
17.175	61	-697.8
17.1833	129	1708.05
17.3275	122	41.75
17.3675	72	6.2
17.455	149	-771.1
17.4925	89	831.65
17.5117	540	208.4
17.5192	85	861.95
17.5225	261	18.1
17.5442	100	-3030.65
17.5525	149	-1093.95
17.5825	113	123.2
17.6158	177	463.25
17.6233	274	286
17.6292	103	833.75
17.645	61	2381.6
17.6483	129	5916.15
17.6517	173	645.85
17.6525	275	59
17.655	116	1058.5
17.6675	90	61.35
17.7083	99	222.2
17.715	119	142.3
17.7633	254	144.7
17.8375	221	272.65
17.94	233	807.55
17.945	232	2157.6
17.9858	417	7
17.9967	250	535.9
17.9975	305	362.5
17.9992	248	3518.2
18	304	1111.7
18.0458	207	-2586.05
18.0708	294	133.3
18.1033	207	-414.7
18.1258	161	-234.4
18.13	89	-6990.65
18.1458	74	4265.9
18.1542	118	129.55
18.2175	255	339.25
18.22	115	3231.1
18.2542	174	24798.7
18.2575	130	5564.25
18.2592	218	32369.7
18.2642	307	3687.65
18.265	114	17353.6
18.2658	233	29936.8
18.2667	70	322262
18.2683	163	14408.6
18.27	189	1915.8
18.2817	323	504.05
18.31	136	-91.7
18.3192	336	-730.05
18.3333	116	2781.65
18.3442	268	-130.7
18.3483	83	-857.45
18.3533	191	-442.35
18.3617	341	-506.65
18.3883	113	-336.75
18.4208	74	-18546
18.4233	76	-3684
18.425	73	-148619
18.4258	61	-10791
18.4375	77	-4031.35
18.4458	337	27.75
18.4508	64	356.5
18.4542	63	164.15
18.4675	88	-1760
18.4708	234	425.55
18.4817	146	-499.15
18.5592	95	492.35
18.5717	193	-1410.3
18.5908	238	-95.25
18.6008	94	79.55
18.6708	343	457.65
18.6725	341	1840.65
18.6733	518	416.85
18.6742	325	957.85
18.7025	273	24.25
18.7042	64	-13153
18.7142	90	445.5
18.765	102	15157.8
18.82	202	746.05
18.84	130	2773.65
18.8717	241	411.65
18.8767	306	100.95
18.8775	232	4673.75
18.8942	69	995
18.8975	103	5051.9
18.9033	218	1323.1
18.9083	220	126.9
18.9125	144	585.95
18.9133	75	10998.5
18.93	128	2247.55
18.9392	234	569.95
18.94	167	-177.45
18.9575	112	-134.8
18.9667	243	428.15
18.9742	338	302.4
18.9925	186	-1543.75
19.0158	178	102.25
19.0358	257	64.5
19.0425	343	15.5
19.0667	103	3304.65
19.0733	174	930.25
19.08	191	656.95
19.0808	132	1006.55
19.0925	96	745.85
19.0975	153	1726.25
19.1325	231	167.65
19.165	187	294.6
19.1825	161	829.5
19.1842	200	-2093.75
19.2067	64	3752
19.25	144	1102.9
19.2575	147	11465.2
19.2817	109	389.55
19.3058	325	84.4
19.3192	201	569.85
19.3217	263	855.9
19.325	224	136.6
19.3258	481	13
19.3583	341	75.25
19.3958	321	152.85
19.4108	150	5547.15
19.4125	143	7783.8
19.4142	176	5362.5
19.4167	148	33612.2
19.4175	74	128959
19.4192	73	1.18411e+06
19.4208	120	1976.75
19.4267	146	4833.2
19.4292	130	32142.6
19.435	91	1112.8
19.4408	156	825558
19.4417	80	6157.1
19.4425	119	17528
19.4433	139	1505.15
19.4442	84	37558
19.4492	344	22.7
19.45	349	9329.5
19.4517	164	5049.7
19.4533	65	1294.2
19.4558	302	52.1
19.4575	256	819.45
19.4608	363	99.55
19.4617	315	74.1
19.4625	132	22702.2
19.4783	259	17255
19.485	86	25233.4
19.4858	230	66852.7
19.4875	260	7484.95
19.4925	298	41.95
19.5092	82	4533.5
19.5167	191	424.25
19.5192	257	192.1
19.52	300	265.65
19.54	89	1282.75
19.5525	171	2736.3
19.5558	315	1053.6
19.5567	314	3422.55
19.5575	329	228.4
19.575	100	6576.65
19.5792	202	103.6
19.5817	77	1317.05
19.5833	317	110.65
19.5942	230	838.1
19.5967	218	184.9
19.6158	217	248.15
19.6167	172	1731.35
19.6183	265	30.55
19.625	291	39.6
19.6417	228	450.35
19.6508	263	87.25
19.6525	315	7.5
19.6542	206	33.3
19.6558	326	12
19.66	269	197.4
19.7008	96	499.8
19.7358	79	1958.55
19.7433	228	79.9
19.8275	94	97.35
19.8683	72	-5618.2
19.8817	208	-49.45
19.8917	199	45.25
19.9017	153	270.15
20.0342	64	1970.25
20.0383	79	1316.45
20.0917	103	1866.35
20.0983	292	1387.35
20.0992	205	1043.3
20.1	204	196.3
20.1008	243	27.5
20.1025	147	17284.5
20.1192	150	132.2
20.1217	113	341.9
20.13	64	1831.1
20.1342	166	24.6
20.1617	156	5369.3
20.1633	156	7719.5
20.1817	147	9854.85
20.1892	150	53.75
20.1942	169	219.95
20.2083	124	14.25
20.2125	174	6611.2
20.2308	405	9
20.2317	176	50.2
20.2333	259	164.1
20.2408	302	8.25
20.2442	316	1.5
20.2458	77	884.95
20.2583	129	1520.1
20.2617	322	14.35
20.2658	110	109.15
20.2692	230	927.55
20.2758	166	84.35
20.2875	99	686.4
20.2983	246	419.35
20.3375	205	76.75
20.3508	114	1362.6
20.3617	244	208.1
20.3958	117	5573.3
20.4042	255	-330.35
20.4483	259	189.1
20.4775	67	189.25
20.5017	143	2167.05
20.5075	410	6.75
20.5092	149	519
20.5175	83	665.4
20.5267	204	76.65
20.5292	186	11472.2
20.53	216	3066.45
20.5308	142	12982.1
20.5342	147	14767.5
20.5442	99	1867.2
20.5575	135	210.5
20.56	66	1922.2
20.5617	134	157.25
20.5658	61	3302.7
20.5692	76	798.75
20.58	220	133.75
20.5892	117	5730.4
20.5958	87	97.1
20.6075	80	273.4
20.6142	126	68.4
20.6458	84	12186
20.6525	174	6802.5
20.665	313	158.8
20.7158	230	754.9
20.7258	80	53.9
20.7383	98	-1246.3
20.7492	350	62.8
20.7542	140	627.8
20.7575	139	1376.5
20.7825	281	-153.45
20.7858	218	193.75
20.8225	70	4279.5
20.8292	234	713.85
20.8367	317	28
20.8683	87	14375.5
20.8825	112	2356.2
20.8842	85	10264.8
20.885	71	7734
20.895	199	250.65
20.9025	139	1967
20.9108	275	204.8
20.915	77	5714.15
20.9217	156	12743.3
20.9225	73	-274218
20.9275	258	1520.75
20.9533	64	2050.8
20.97	198	568.6
20.9767	207	284.5
20.9858	87	619.25
21.0317	75	29093
21.0567	172	7000.5
21.0617	173	3443.85
21.0683	79	5062.35
21.0742	119	2420.85
21.0808	206	1815.35
21.0925	171	2127.4
21.1042	176	1283.05
21.1083	160	8170.9
21.12	156	16914.2
21.1258	164	94.75
21.14	288	306.6
21.1417	140	7197.6
21.145	170	4409.5
21.1458	332	7646.05
21.2017	156	21681.5
21.2283	71	9758.5
21.2317	74	125895
21.2375	81	1876.15
21.2658	139	5308.1
21.2858	198	1299.95
21.2933	68	-5971.7
21.3342	210	482.25
21.3592	219	-5051.6
21.365	206	1031.45
21.385	341	498.7
21.4025	122	-278.55
21.4175	174	2820.2
21.4208	80	371.65
21.4283	158	1126.55
21.4392	418	79.4
21.4408	200	5820.3
21.4458	203	103.05
21.4492	328	4442
21.45	183	2350.75
21.4508	184	530.85
21.4567	133	2709.95
21.4608	73	102042
21.4617	229	9579.45
21.4642	415	855.85
21.4683	193	852.75
21.4717	267	738.6
21.4725	231	1055.6
21.4825	156	11200
21.495	79	5387.85
21.4975	269	165.35
21.5025	357	137.7
21.5117	185	131.35
21.515	103	1872.3
21.5383	81	1272.6
21.5483	425	22.8
21.5633	156	1402.2
21.5817	167	261.05
21.5825	503	145.35
21.5833	189	184.65
21.62	73	71622.6
21.625	246	307.45
21.6267	198	646.55
21.6283	188	537.25
21.635	184	428.15
21.6567	102	309.55
21.6575	247	74.75
21.6608	135	64.1
21.6942	75	7952.3
21.6967	202	148.2
21.7167	306	442.75
21.7208	239	8.35
21.7292	126	209.4
21.7317	317	108.4
21.7417	335	84.25
21.7508	131	5227
21.7567	75	25273.7
21.77	202	194
21.775	231	66.75
21.805	79	5076.75
21.8175	162	79.45
21.8192	247	49.75
21.8408	337	29.75
21.8625	205	9215.25
21.8642	127	177.15
21.865	201	6801.4
21.8667	172	3498.05
21.8675	173	417.5
21.8692	183	900.6
21.87	256	959.9
21.8725	292	384
21.8733	207	968.1
21.8758	143	737.45
21.8775	190	930.8
21.8967	308	215.35
21.9	332	205.65
21.9017	202	1114.4
21.9033	291	1196.85
21.9467	124	161.85
21.9608	79	5588.6
21.9808	67	348
21.995	317	16.25
22.0217	196	-729.85
22.0258	124	943.8
22.0267	71	8059.85
22.0325	82	172.05
22.0383	159	415.3
22.0592	205	214.5
22.0625	103	2018
22.0675	346	40.5
22.0967	69	225.75
22.0975	110	21.5
22.1042	208	10
22.105	281	53.05
22.1075	244	238.7
22.1542	183	920.25
22.1558	232	672.55
22.1725	320	4407.9
22.2058	180	-2116.8
22.2192	63	2288.35
22.2575	173	-20347.1
22.29	134	-41369.9
22.3183	175	-77116.1
22.3258	154	-2091.9
22.3283	160	-67470.7
22.3533	238	-107534
22.3625	101	-41193.8
22.3642	87	-30830.2
22.4008	130	-218866
22.4425	69	-3517.2
22.4558	327	-211072
22.4608	231	-482.2
22.4992	320	66.4
22.5308	204	-884.6
22.545	81	-910.85
22.5492	360	14
22.5758	167	-315.35
22.5883	143	-697.4
22.6575	198	290.15
22.6875	66	2033.5
22.7133	239	-530.2
22.7225	189	-1205
22.7583	84	-4539.2
22.7642	239	159.75
22.81	131	-4542.85
22.815	238	-2524.45
22.8483	77	-3712.35
22.8625	64	7162.25
22.8908	148	-3230.55
22.9175	149	-2006.85
22.9417	196	-524.85
22.9442	160	505.5
22.9717	142	379.75
22.9833	273	41.45
22.9883	179	58
23.0408	303	69.45
23.0433	301	506.05
23.07	300	117.45
23.0717	301	42.75
23.1258	327	-1619.4
23.1333	172	-2147.3
23.1958	117	-6352.25
23.205	319	131.7
23.2117	154	51.6
23.2258	303	194.1
23.2283	238	-782.75
23.2442	81	10.7
23.2483	119	-291.2
23.2633	234	17.25
23.2817	287	41.4
23.2883	275	-384.35
23.2967	106	-6048.8
23.3008	337	-63.65
23.3467	78	1181.4
23.3483	281	39.4
23.4	272	76.7
23.4233	178	14.5
23.4242	117	-1983.85
23.4367	184	22.4
23.4383	150	32.25
23.4475	105	1474
23.4533	267	40.55
23.4642	220	12.85
23.465	164	19.4
23.4808	232	76.95
23.5	73	1898.9
23.5342	297	14.5
23.575	191	455.95
23.665	166	25.5
23.7325	209	14.9
23.7758	143	108.8
23.7858	298	37.75
23.7975	81	56.7
23.8	201	19.4
23.8317	115	84
23.8458	284	21.5
23.865	295	199.65
23.8892	116	209.25
23.9008	80	97.05
23.9275	205	-220.8
23.9392	121	-49.5
23.9583	175	-86.1
23.9758	117	474.5
23.98	74	939.45
24.045	212	55.1
24.0592	71	143.25
24.0675	332	174.1
24.07	333	94.65
24.0867	190	159.3
24.0917	232	1645.7
24.0925	233	336.65
24.0942	164	48.7
24.0958	96	239.1
24.1108	143	-337.55
24.1133	176	289.8
24.12	307	44.9
24.1208	149	307.55
24.1217	190	35.75
24.1233	195	122.15
24.125	278	110.5
24.1333	85	67.7
24.135	72	877
24.1525	275	118.4
24.1533	140	715.75
24.1542	230	293
24.16	375	28.55
24.1783	285	15
24.1867	231	84.6
24.1983	186	844.5
24.215	289	22.75
24.2383	208	9.2
24.2775	96	494
24.3383	79	1110
24.3433	75	6154.75
24.3492	180	139.95
24.35	192	94.65
24.3525	134	552.15
24.3533	135	991.1
24.355	93	1664.45
24.3817	219	142.4
24.3833	73	73583.9
24.4342	172	1195
24.465	61	907.9
24.4733	77	302.1
24.4867	75	8837.7
24.5175	179	24.85
24.5308	75	-11350.2
24.5483	244	205.7
24.5667	104	122.15
24.5892	76	347.9
24.5908	118	148.3
24.5917	159	196.9
24.6083	168	185.75
24.6383	315	55.7
24.6667	60	1137.85
24.685	77	63.8
24.725	128	70.5
24.7642	131	45.75
24.775	142	2613.75
24.7858	370	11.15
24.8025	392	16.55
24.8317	129	-9422.5
24.8433	341	77
24.8533	340	129
24.8567	409	204.7
24.8575	450	2402.25
24.8633	448	19.9
24.8675	293	267.2
24.87	133	30973.5
24.8708	421	8834.95
24.8758	142	196.5
24.8967	423	1844.75
24.8983	407	790.75
24.9083	343	62.25
24.9217	256	3791
24.9258	158	2765.75
24.935	68	5105
24.9458	91	-206.2
24.9467	65	-230.3
24.9508	194	183.65
24.9517	240	251.55
24.9658	141	3052.3
25.0017	227	54.85
25.005	155	1057.4
25.015	156	273.05
25.0225	170	308.4
25.0233	111	302.45
25.025	188	244.05
25.0258	65	126.7
25.0275	95	307.65
25.0308	77	1088.7
25.0325	291	60.75
25.0342	290	261.3
25.0358	231	242.55
25.0367	79	786.9
25.04	157	12389.9
25.0408	416	41.75
25.0417	219	116.35
25.0433	123	179.1
25.0483	116	1276.35
25.0558	330	34.95
25.0617	83	419.55
25.0633	217	465.7
25.0642	226	222.1
25.065	97	181.95
25.0692	191	418.65
25.0833	155	199.6
25.0858	171	118.15
25.0908	74	510.35
25.0992	216	67.25
25.1375	274	41.5
25.1433	79	666.3
25.2042	103	805.9
25.205	101	359.7
25.2067	143	182.35
25.21	200	130
25.2125	99	218.5
25.2142	130	479.1
25.215	73	6631.9
25.2158	111	155
25.22	61	282.1
25.2208	204	528.65
25.2217	189	238.3
25.2258	75	8477.95
25.2267	170	234.55
25.2283	84	1268
25.2292	89	369.5
25.2342	133	542.15
25.2358	157	284.4
25.2417	188	26.9
25.2425	158	136.8
25.2492	69	451.6
25.25	182	68.75
25.2558	239	17.2
25.2575	104	104.85
25.2583	136	56.75
25.26	217	930.9
25.2667	226	292.9
25.2858	156	692.95
25.2875	115	189.45
25.2917	198	101.7
25.3042	188	258.25
25.3308	335	21.75
25.3583	289	906.2
25.3667	299	72.8
25.4125	94	18.45
25.4617	214	33.8
25.4983	79	52.4
25.5042	307	33.9
25.5233	116	95.6
25.5258	148	105.45
25.5325	157	69.35
25.535	86	32.5
25.5392	150	78.35
25.6	310	20.95
25.6025	159	20.85
25.6033	203	83.95
25.6225	115	42.55
25.6342	217	332.45
25.6433	219	8.75
25.6475	94	167.2
25.6633	319	23.6
25.7033	200	83.45
25.7125	188	118.7
25.7175	156	244.75
25.7242	90	69.4
25.7367	253	32.25
25.7492	67	259.15
25.7525	149	1567.65
25.755	91	60.65
25.76	148	1710.8
25.765	105	307.05
25.7658	103	3767.6
25.7667	218	1819.35
25.7675	75	6053.7
25.7692	89	512.85
25.77	129	2203.65
25.7708	73	50555.3
25.7725	217	8531.1
25.7733	142	99.05
25.775	147	8508.85
25.7775	135	275.15
25.7783	118	122.7
25.78	191	4785.75
25.7817	193	405.9
25.7858	66	429.3
25.7892	348	13.25
25.79	192	1043.65
25.7908	230	1509.8
25.7917	204	4821.6
25.7925	293	51.45
25.7942	243	63.25
25.795	64	40.2
25.7958	292	77.4
25.7967	69	3725.45
25.8	141	95
25.8042	145	151.65
25.8083	127	180.6
25.8092	146	41.35
25.8117	233	57.25
25.825	223	109.3
25.8283	155	234.8
25.8375	343	93.5
25.8383	97	79.95
25.8425	202	58.1
25.8442	306	286
25.845	321	20.75
25.8525	346	177.65
25.8592	336	10.5
25.8625	304	28
25.8642	254	77.5
25.8717	239	85.45
25.9383	154	2160.25
25.9858	175	395.1
25.9892	158	414.35
26.0167	217	2044.45
26.0183	163	364.35
26.0192	66	534
26.0525	318	59.25
26.0717	160	904.15
26.0733	103	2731.5
26.0742	319	873.2
26.0758	73	34060
26.0775	161	226
26.0808	157	887.35
26.0892	129	2150.5
26.1033	233	62.4
26.1067	199	78.5
26.115	193	309.5
26.1417	303	23
26.145	272	75.1
26.2092	65	2349.6
26.2408	401	23.35
26.2458	66	17346
26.2492	95	434.05
26.31	292	180.4
26.39	93	247.2
26.4092	96	87
26.4108	321	130
26.4117	144	61
26.4283	86	1171.15
26.4317	67	346
26.4367	79	2752.5
26.4408	82	384.55
26.445	77	1800.35
26.46	301	20.05
26.48	102	404.75
26.5508	103	17331
26.5567	230	933.8
26.5575	91	1738.4
26.5608	156	3609.3
26.5692	84	1741.25
26.5708	92	217
26.6333	308	32.2
26.6617	116	428.85
26.6633	163	259.75
26.6667	66	684.35
26.6708	149	1073.4
26.6783	102	267.15
26.6792	61	1412.35
26.6808	100	1092.7
26.6825	318	110.45
26.685	362	723.9
26.6867	303	18.75
26.7283	214	43.85
26.7392	112	26
26.7683	218	2441.35
26.7875	280	215.7
26.7975	205	1192.7
26.8283	218	3293.15
26.8617	119	165.3
27.0633	135	333.45
27.0692	90	312.55
27.0717	193	226.1
27.0725	99	353.95
27.0733	104	313.85
27.075	71	814.55
27.0775	131	1379.75
27.0808	191	2472.45
27.0825	85	374.2
27.0842	134	567.2
27.0875	95	99.2
27.0908	172	87
27.0917	173	116.4
27.0925	145	400.75
27.0933	89	3235.85
27.0942	133	4407.95
27.095	73	44659.4
27.0958	318	1570.3
27.0967	175	120.75
27.0975	305	774.15
27.0983	306	227.6
27.0992	103	2576.5
27.1008	291	80.5
27.1025	227	18.5
27.1033	151	44.8
27.1092	221	315.4
27.1108	77	279.85
27.1133	91	193
27.1142	119	335.9
27.115	129	2031.85
27.1192	130	312.5
27.1242	171	34.5
27.1267	105	285.55
27.1308	170	25.55
27.1325	83	44.75
27.1342	184	74.9
27.1683	193	52.5
27.1983	256	129.4
27.2042	75	10360.9
27.2158	374	14.7
27.2183	394	12.5
27.22	422	14.75
27.2308	77	468.6
27.2442	175	143.05
27.2492	166	72.35
27.2558	223	143.7
27.2742	201	79.55
27.2833	95	73.85
27.285	232	240.95
27.3817	131	-37.2
27.4692	291	10.25
27.4942	89	111.05
27.5175	154	43.25
27.5258	246	31.55
27.5325	192	28.7
27.575	186	14.15
27.5975	217	504.3
27.6067	143	79.95
27.6417	188	39.25
27.6433	298	14.75
27.6583	129	84.75
27.6642	232	31.75
27.665	133	244.55
27.6667	127	20.5
27.6775	147	-778
27.6867	141	47.75
27.6908	218	162.75
27.7017	121	18.9
27.71	86	3.75
27.72	147	1202.9
27.7233	191	213.1
27.7342	185	51.5
27.7358	80	66.45
27.7458	84	177.4
27.7492	160	85.75
27.755	87	84.65
27.7558	78	42.1
27.7567	89	300.35
27.7575	96	28.35
27.7642	149	163.5
27.7808	98	-40.1
27.7942	132	60.45
27.8075	232	24.35
27.8208	130	-66
27.8217	69	340.8
27.8233	87	181.35
27.8433	117	595.25
27.8458	130	410.6
27.8467	104	111.8
27.85	334	65.3
27.8508	147	5203.5
27.8542	192	114.2
27.8558	102	115.35
27.8567	292	171.65
27.8575	293	79.55
27.8583	171	344.1
27.8592	74	2227.15
27.86	73	32011.2
27.8608	305	857.8
27.8617	204	601.95
27.8625	135	195.25
27.8633	244	63.9
27.8642	360	53.25
27.865	156	50.85
27.8658	217	9940.9
27.8675	89	210.9
27.8683	210	9.2
27.8692	321	35.25
27.8708	77	432.85
27.8717	96	22.25
27.8725	68	86.55
27.8767	66	219.45
27.8775	151	84.25
27.88	196	22.75
27.8808	337	13.15
27.8817	67	146.95
27.8825	134	228.5
27.89	133	1872.75
27.8917	115	317.1
27.8925	155	101.4
27.8933	76	290.9
27.8958	203	86.05
27.8983	193	185.45
27.9033	113	94.7
27.9067	87	65.45
27.9167	285	186.6
27.9192	215	56.3
27.92	70	137.1
27.9325	148	236.3
27.935	125	66.25
27.9358	204	207
27.9383	335	30.6
27.9392	401	15.05
27.945	133	170.1
27.9542	129	76.6
27.9658	126	11.9
27.9675	327	24.25
27.9792	286	47.95
28.0475	231	49.9
28.0633	66	79.8
28.0908	232	10.7
28.1475	305	29.15
28.15	149	104.5
28.1658	129	44.85
28.1742	89	62.65
28.175	147	690.8
28.1833	116	39.6
28.1975	75	439.05
28.2008	145	26.75
28.2325	146	62.65
28.2867	113	255.25
28.3008	244	53.4
28.3017	509	26.55
28.3025	178	38.1
28.305	305	4123.85
28.3083	79	155.35
28.3133	318	5882.75
28.3208	333	35.25
28.3242	117	1052
28.3383	368	45.05
28.34	210	7.5
28.355	354	44.3
28.3558	215	146.4
28.3942	265	2.4
28.4025	159	26.55
28.4075	147	278.3
28.4092	245	18.85
28.4142	111	17
28.4283	231	32.25
28.4325	117	73.2
28.4375	218	148.5
28.4392	204	35
28.4425	217	353.65
28.4458	216	36.85
28.4483	214	296.75
28.4492	142	36.4
28.4533	319	14.75
28.4725	73	2480.1
28.4733	354	55.25
28.4767	279	22.6
28.5075	146	21.25
28.53	114	20.5
28.5442	62	432.6
28.5583	91	667.55
28.5617	100	403.2
28.575	160	312.5
28.5758	362	129.15
28.5775	225	131.2
28.5783	106	166.7
28.5792	186	101.5
28.58	174	152.1
28.5858	242	199.5
28.59	267	182.85
28.5925	96	449
28.595	222	599.4
28.5958	185	326.45
28.5975	249	314.65
28.6017	304	206.75
28.6033	246	1227.95
28.6042	449	500.1
28.6058	255	121.25
28.6067	317	385.5
28.6075	124	153.9
28.6092	117	6249.7
28.6117	318	1526.9
28.6158	94	156.7
28.6175	396	27.5
28.6333	353	92.85
28.6567	118	-5117.55
28.6575	117	-52116.8
28.6583	75	-65106.9
28.6592	69	-7218.65
28.66	89	-1637
28.6608	79	-1552
28.6725	342	24.65
28.6758	337	48.4
28.6825	92	-84.6
28.6883	291	13.8
28.71	62	-38.65
28.7133	218	210.4
28.7158	204	104.75
28.7392	319	47.7
28.7533	169	27.3
28.7742	313	14.05
28.7817	218	131.5
28.8342	147	377
28.8467	233	12.85
28.9217	217	338.7
28.9308	207	8.75
28.94	70	20.85
29.0008	292	32.35
29.0017	257	28.8
29.0283	312	4.75
29.0608	150	30.8
29.0775	113	36.5
29.0842	126	40.85
29.0925	61	24.75
29.11	103	340.75
29.1208	202	156.25
29.1667	358	16.25
29.2258	449	46.5
29.23	361	57.35
29.2583	98	105.75
29.2658	233	177.95
29.2667	183	136.1
29.2683	98	169.45
29.2692	244	370.75
29.27	170	134.15
29.2708	79	493.65
29.2725	76	1220.35
29.2733	231	1346.65
29.2742	83	1365.5
29.275	87	1672.1
29.2758	61	1764.05
29.2767	192	4803
29.2775	72	4302.85
29.2783	149	7893.15
29.2792	148	12022.4
29.28	73	286066
29.2808	103	16774.1
29.2817	220	614.2
29.2825	141	576.35
29.2833	114	204.5
29.2842	75	23894.5
29.285	66	2201.15
29.2858	257	200.5
29.2867	156	522.35
29.2933	158	323.7
29.2958	360	35.5
29.2975	333	63.5
29.3	417	95.1
29.3008	121	146.35
29.3017	181	243.8
29.3033	185	486.65
29.3042	91	232.35
29.3075	419	243.15
29.3083	80	123.2
29.3342	127	28.2
29.3392	64	45.65
29.3492	192	33.25
29.3575	97	20.5
29.3683	306	37.8
29.3708	72	114.8
29.3725	422	30.35
29.3767	103	166.8
29.3783	115	71.45
29.38	246	41.85
29.3833	247	18.35
29.3917	116	126.6
29.395	401	8.25
29.4058	132	111.15
29.4083	125	20.75
29.4108	190	22.05
29.4133	175	26.5
29.4392	210	37
29.4683	322	17.55
29.475	226	9.75
29.5067	152	18.5
29.5075	213	42.5
29.5133	217	118.75
29.5308	129	466.6
29.5383	144	109.45
29.5417	237	17.75
29.5808	189	75.9
29.5975	205	37.4
29.6025	131	-38.95
29.6208	144	11
29.6267	155	2.75
29.66	379	10.25
29.6958	68	1909.55
29.6967	64	23.25
29.7233	151	3728.7
29.7258	102	5774.15
29.7333	105	6040.4
29.735	67	7634.6
29.7358	74	161995
29.7367	73	1.71524e+06
29.7375	217	168786
29.7383	75	150014
29.7392	306	22455
29.74	232	22401.3
29.7408	307	12524.5
29.7417	141	14481.6
29.7425	318	17069.5
29.7433	118	10962.5
29.7442	135	8059.05
29.745	99	7987.5
29.7458	88	2844.05
29.7467	60	5958.7
29.7475	70	3780.8
29.7508	82	2232.6
29.7517	211	275.6
29.7525	84	2213.5
29.7533	326	86.45
29.7542	260	381.4
29.755	234	1478.9
29.7558	233	10020.4
29.7567	332	19515
29.7575	291	4589.3
29.7583	77	9124.2
29.7592	66	12099
29.76	63	908.4
29.7608	350	22.75
29.7617	91	1421.85
29.7625	373	50.05
29.765	415	17.25
29.7683	78	1073.9
29.78	65	2505.9
29.7817	329	163.75
29.7825	92	167.75
29.785	176	916.85
29.7875	173	2176.5
29.7892	380	370.7
29.7917	525	72.6
29.7933	95	6122.9
29.7942	247	651.15
29.7983	406	528.35
29.8017	91	117.8
29.8042	336	316.25
29.8125	209	25
29.8133	526	18.7
29.8158	418	135.6
29.8192	522	812.1
29.82	328	88.05
29.8208	171	11.5
29.8217	378	89.5
29.8233	300	34.75
29.8325	251	206.2
29.8392	81	70.7
29.8475	66	184
29.85	122	221.8
29.8508	118	35.25
[truncated: 489 more rows]

## Sheet: Diphen D5
All Metabolites				Increased Metabolites					Decreased Metabolites
RT (min)	Mass	DEET - CTL		RT (min)	Mass	DEET - CTL	Metabolites		RT (min)	Mass	DEET - CTL	Metabolites
8.0475	120	3337.56		8.05667	89	8086.39			9.08083	89	-74204.1
8.05667	89	8086.39		8.18	79	139428			10.3708	66	-76369.1
8.1425	262	-33.7222		8.21	67	5003.72			10.3842	79	-31709.6	l-Alanine, 2 TMS
8.16	157	455.333		8.22167	77	82616.2			10.6825	67	-5881.33
8.18	79	139428		8.22417	73	66159.1	Pyridine, 2,3,6-trimethyl-		12.11	147	-40969.9
8.1825	119	-1014.94		8.225	74	12078.1			13.1375	117	-12285.1	trans-3-Hexenedioic acid, 2 TMS
8.18667	90	1534.39		8.22667	81	8791.28			14.0183	101	-7154.89	Silanol
8.195	89	3292.5		8.2325	117	27587.4			14.2067	84	-5973.44
8.20667	108	249.167		8.2475	62	12382.6			14.4458	299	-49035.7	3-Pyridinecarboxylic acid, 1 TMS
8.20917	69	3171.78		8.25167	63	30196.7			14.485	148	-7685.17	L-Isoleucine, 2 TMS
8.21	67	5003.72		8.27917	121	253188			14.7767	180	-6913.61	Glycine, 3 TMS
8.22167	77	82616.2		8.5175	207	12326.5			15.9642	205	-60535
8.22417	73	66159.1		8.74083	69	26760.1	carbamate, 3 TMS		15.965	73	-1.05505e+06	serine, 3 TMS
8.225	74	12078.1		8.7425	76	28508.8			15.9658	131	-24350.2
8.22667	81	8791.28		8.745	70	65454.5			15.9675	84	-6680.33
8.2275	72	2065.83		8.75	72	832423			16.0283	74	-13640.1	2-Piperidinecarboxylic acid, 2 TMS
8.23083	165	-561.167		8.80583	130	5877.56			16.515	74	-42136.2
8.23167	88	1483.39		8.88083	155	37944.8	Pyridine, 3-trimethylsiloxy-		16.5158	73	-340352	L-threonine, 3 TMS
8.2325	117	27587.4		9.055	89	102136			16.7675	102	-8984.33	Butanoic acid, 3 TMS
8.2475	62	12382.6		9.06583	75	23929.6	Propanoic acid, 1 TMS		18.1067	75	-317298	aminoethanethiosulfuric acid, 1 TMS
8.24917	253	149.444		9.61417	77	5040.67			18.1742	129	-11872.1
8.25	123	878.889		9.70333	77	8693	Acetic acid, 2 TMS		18.2783	132	-10599.1
8.25167	63	30196.7		11.015	79	9264.11			18.3025	70	-130267	Aminomalonic acid, 3 TMS
8.26167	102	896.167		11.2042	79	5097.39	Ethanedioic acid, 2 TMS		18.4342	76	-7104
8.27917	121	253188		11.2292	130	12738.4	butane, 2 TMS		18.4375	71	-5559.56
8.34833	135	257.333		11.3317	79	5815.83			18.4508	133	-9899.83
8.35167	70	704.667		12.2767	73	30876.3	Ethanimidic acid, 2 TMS		18.6517	66	-34970
8.36333	190	113.667		12.385	73	110914	3-Butenoic acid, 2 TMS		19.6675	73	-53415.1	2-Butenedioic acid (E)-, 2 TMS
8.37167	168	78.6667		12.5975	174	9663.33			21.3808	192	-24807.3
8.44	207	970.833		12.6	100	22262.8	L-valine, 2 TMS		21.5025	147	-14406.9
8.45333	183	534.167		12.7883	115	10699.9			21.5958	200	-6367.67
8.45583	100	1832		14.3325	301	6185	glycerol		21.8525	147	-81686.9	butanoic acid, 3 TMS
8.45833	110	113.667		14.68	130	7589.11			22.1933	117	-147911
8.45917	184	35.5		17.2058	75	9149.11			22.21	147	-2.76552e+06
8.46167	119	1228.5		18.0742	75	228940			22.2117	146	-61551.6
8.4625	126	785.611		18.685	66	38528.3	á-Hydroxypyruvic acid		22.2125	145	-7639.72	taurine, 3 TMS
8.475	125	99.8333		19.4767	64	7278.5	L-Proline, 2 TMS		22.215	195	-7687.72
8.48583	193	-209.944		20.2642	70	7595.17			22.24	76	-17703.1
8.48667	207	-1085.39		20.2692	100	9041.56			22.2442	70	-84726.9
8.48917	170	2216.5		20.3075	84	24108.8			22.2483	72	-193099
8.5075	223	124.611		20.475	84	48000.2			22.2517	113	-56407.9
8.5175	207	12326.5		20.4758	174	105086	L-lysine		22.2525	115	-117656
8.5275	208	2342.72		20.6667	75	62736.2			22.2542	116	-104291
8.66	209	340.889		20.7642	174	7931.78			22.2583	100	-980076
8.68667	121	-3390.56		21.0408	76	9920.39			22.2592	133	-884247
8.74083	69	26760.1		21.1558	173	12502.9			22.26	85	-59221.1
8.7425	76	28508.8		21.1567	191	13308.7	L-Aspartic acid, 3 TMS		24.8433	133	-35806.5	DL-Ornithine, 4 TMS
8.745	70	65454.5		21.16	142	31494.4	Citrulline, 5 TMS		25.4658	204	-12301.6	glycoside
8.75	72	832423		21.37	70	19953	Glutamic acid, 3 TMS		25.4675	133	-6381.89
8.77167	64	2414		21.4542	77	12507			27.0033	147	-5203.22	Ribitol, 5 TMS
8.80583	130	5877.56		22.2775	77	5912.83			29.4342	73	-10166.9	N-Acetyl-D-glucosamine, 4 TMS
8.8575	295	68.5		22.2875	75	243251			36.3675	147	-6595	Inosine, 3 TMS
8.88083	155	37944.8		22.3025	76	13092.7
8.89083	156	4881.78		22.4175	189	72403.7
8.90333	112	4977.78		22.8742	174	25732.5
8.9125	137	476.944		23.0308	133	18111.7			24.5717	170	-323.389
8.925	151	542.5		23.095	73	164755			24.6275	169	-349.833
8.92917	319	-36.3889		23.2183	100	17751.6
8.98917	131	-2240.89		23.3908	130	8736.72
9.0075	120	829.778		23.4233	133	5840.06
9.02167	91	2200.78		24.4217	133	5280.06	1,2,3-Propanetricarboxylic acid
9.0375	210	261.944		29.1758	129	5662.28	Myo-Inositol, 6 TMS
9.05167	194	291		29.1767	217	11142.7
9.055	89	102136		29.2025	147	19961.9
9.06083	98	1030.39		38.1608	73	19643.7	maltose, 8 TMS
9.0625	173	321.278
9.06417	176	1153.22
9.06583	75	23929.6
9.06833	116	2764.33
9.07	106	1548.78
9.07167	127	227.444
9.0725	198	61.5556
9.07333	207	3883.83
9.07667	95	-766.167
9.0775	63	1115.89
9.07833	191	2732.61
9.08083	89	-74204.1
9.085	139	129.833
9.09417	169	35.8333
9.1725	157	-488.5
9.2	158	-54.7778
9.22083	127	33.5556
9.3425	127	-1814.78
9.38083	127	2354.17
9.38917	155	2101.06
9.39	112	-166.833
9.40083	234	-276.556
9.40167	166	426.222
9.4125	158	-45.3333
9.47167	84	3048.89
9.5175	207	-85.5556
9.5275	153	46.8889
9.565	143	-172.167
9.5925	112	91.9444
9.60917	125	183.611
9.61417	77	5040.67
9.6175	155	79.5556
9.70333	77	8693
9.72167	199	25.5
9.73583	131	658.667
9.75167	98	-182
9.755	64	-2145.17
9.77833	80	-185.556
9.79083	170	-273.056
9.83	181	156.389
9.85	150	-68
9.92583	88	122
9.93	126	161.333
9.9325	121	157
9.95167	153	108.5
9.9675	148	2431.17
10.0067	190	-541.111
10.0525	86	-1175.89
10.0992	191	-307.833
10.1167	115	-820.944
10.12	176	-72.5
10.125	86	-1603.28
10.1525	61	-3770
10.1875	103	1093.67
10.235	71	2092.83
10.275	239	20.5
10.3208	372	24.5
10.3708	66	-76369.1
10.3817	171	722
10.3825	154	-724.444
10.3842	79	-31709.6
10.4925	191	-292.056
10.5058	87	844.333
10.5067	131	-4905.28
10.545	84	-2828
10.5483	83	-791.556
10.55	67	-2556.33
10.5683	269	-38.2778
10.6283	350	-22.1111
10.6825	67	-5881.33
10.7083	128	224.667
10.73	76	2508.83
10.7308	81	1940.67
10.8042	184	42.2222
10.8325	177	157.778
10.8392	114	397.833
10.955	117	3674.89
10.9892	202	102.5
11.015	79	9264.11
11.1425	125	323.222
11.155	270	-39.3333
11.1825	83	996.333
11.1833	97	1194.94
11.1858	82	544.667
11.1933	141	513.722
11.195	139	122.778
11.1992	157	1852.28
11.2042	79	5097.39
11.2117	480	-24.2222
11.2292	130	12738.4
11.2317	62	254.889
11.2633	454	14
11.2658	154	169.556
11.3233	167	-672.556
11.3317	79	5815.83
11.335	197	54.3333
11.3892	89	906
11.4142	70	-2352.17
11.5058	152	1457.94
11.5142	392	-657.444
11.5225	82	241
11.5308	125	86.4444
11.535	132	424.722
11.5533	193	-510.944
11.5567	130	-2476.17
11.5583	69	-3619.11
11.5592	81	-2063.83
11.6208	173	-139.167
11.635	123	393.333
11.65	211	-196.722
11.66	339	13.4444
11.6808	87	1902.33
11.7067	341	-21.6667
11.755	62	-569.556
11.7642	95	259.333
11.81	228	1157.72
11.8783	84	3634.17
11.9175	254	46.5556
12.02	275	10.5556
12.0583	191	-361
12.0733	182	-108.222
12.11	147	-40969.9
12.1842	120	-396.611
12.1867	80	108.167
12.2108	136	340.722
12.2125	210	1094.89
12.2183	144	-197.667
12.2442	204	152.333
12.2758	240	-39.7222
12.2767	73	30876.3
12.3433	81	321.611
12.3517	87	3368.44
12.3775	163	-2556.78
12.3825	101	1906.39
12.385	73	110914
12.535	250	28
12.5683	197	60.4444
12.5817	164	201.222
12.5967	176	1638.78
12.5975	174	9663.33
12.6	100	22262.8
12.6008	295	-25
12.6017	120	4988.5
12.6317	152	3146.06
12.7658	223	-31.1667
12.7675	94	-1657.39
12.7858	106	875.278
12.7883	115	10699.9
12.8483	149	2996.33
12.8492	117	1003.61
12.9017	77	3284.56
12.9575	86	-445.611
12.9683	84	1161.17
12.9917	304	-32.1667
13.135	89	-4405.72
13.1375	117	-12285.1
13.1383	118	-1173.78
13.1517	129	511.667
13.1975	103	-1166.67
13.1992	93	188.333
13.2583	89	-2378.94
13.2658	100	-960.667
13.3092	241	-1093.06
13.355	276	12.6667
13.3575	68	154.333
13.3908	228	454.5
13.4358	78	418.556
13.4425	130	644.944
13.4433	86	1571.28
13.4467	173	268.556
13.4483	114	221.444
13.455	261	40.6667
13.4558	157	174.556
13.46	135	291.611
13.4625	87	1020.94
13.5008	108	199.944
13.5042	283	14
13.5442	191	-96.2222
13.5625	114	105.889
13.5725	64	343.056
13.575	72	1108
13.5767	131	698.611
13.5792	243	200.611
13.5833	117	274.5
13.62	369	-46.7778
13.7408	219	-28.3889
13.84	70	1271
13.85	222	81.2222
13.8517	221	386.667
13.9267	114	477
13.9317	240	74.1111
13.9392	79	2614.61
14.0183	101	-7154.89
14.17	99	1223.28
14.2067	84	-5973.44
14.2358	87	-2488.22
14.3067	253	362
14.3258	137	4334.72
14.3325	301	6185
14.4275	84	-4549.94
14.4458	299	-49035.7
14.4708	187	-226.833
14.4717	284	720.5
14.4733	78	-1292.22
14.485	148	-7685.17
14.6575	69	3854.78
14.6758	68	1410.39
14.68	130	7589.11
14.6858	132	1512.5
14.72	169	-130.333
14.7208	182	-850.222
14.7767	180	-6913.61
14.8392	230	77.1667
14.8558	135	3053.67
14.8967	144	218.833
14.9167	341	-42.1667
14.9192	151	-724.333
14.945	136	2439
14.9842	212	606.889
14.9883	223	96.4444
15.0017	316	352.111
15.0575	254	30.3889
15.1133	63	648.833
15.2042	229	25.0556
15.2492	93	1055.17
15.4425	195	-751.222
15.5833	170	173.611
15.5883	74	-4574.5
15.8933	95	-191.444
15.9617	208	-681
15.9642	205	-60535
15.965	73	-1.05505e+06
15.9658	131	-24350.2
15.9675	84	-6680.33
15.9683	231	-756.944
15.9692	82	-1414.89
16.0283	74	-13640.1
16.0367	264	-126.444
16.0383	146	-190.5
16.0458	120	-304.333
16.1142	152	-31.9444
16.1267	159	-61.8889
16.2433	141	-172.222
16.2567	269	-39.2778
16.3675	117	575
16.3975	96	64.7778
16.4083	150	-83.1667
16.4192	172	-1061.67
16.4283	185	67.5556
16.4725	78	-130.333
16.4908	197	-113.333
16.5083	335	-63.3333
16.51	106	-229.778
16.5117	89	-2163.61
16.5133	189	-641.222
16.5142	158	-2393.11
16.515	74	-42136.2
16.5158	73	-340352
16.5175	246	-143.389
16.5183	214	-261.278
16.545	93	304.5
16.56	195	-60.7778
16.5925	136	-27.7778
16.7383	282	-43.1667
16.7675	102	-8984.33
16.8742	87	479.667
16.8808	207	-119.444
16.8867	116	-2996.39
16.9092	117	-1073.94
16.9308	299	609.167
17.0225	193	495.667
17.0708	251	225.889
17.1017	308	74.1111
17.1258	149	778.778
17.1317	247	-274.667
17.1483	87	440.111
17.2058	75	9149.11
17.275	221	-60.4444
17.2792	100	410.833
17.3025	172	-441.222
17.3642	303	53
17.4392	180	-297.333
17.5717	227	67.1667
17.6158	122	115.389
17.7967	217	-61.5
17.8475	207	-265.667
18.0067	96	610.722
18.0167	183	273.611
18.0558	120	1724.83
18.0742	75	228940
18.1067	75	-317298
18.1742	129	-11872.1
18.1767	162	-171.333
18.1883	293	-51.4444
18.2025	211	-1131
18.2275	342	-84.2222
18.2725	140	-391.611
18.2783	132	-10599.1
18.3025	70	-130267
18.33	79	1485.5
18.3817	128	-3821.89
18.3842	154	3382
18.4342	76	-7104
18.4375	71	-5559.56
18.4508	133	-9899.83
18.4575	130	-2749.78
18.4617	81	-1994.67
18.5475	213	244
18.5925	467	32.3889
18.6517	66	-34970
18.685	66	38528.3
18.8058	154	906.333
18.8283	204	128.889
18.8408	155	493.167
18.9158	128	-4503.67
18.9925	104	-1602.22
19.0075	176	2433
19.0317	166	69.8889
19.0517	198	97.3333
19.0608	99	599.167
19.0833	146	356.722
19.0925	153	4862.89
19.135	150	318.222
19.1492	129	1145.33
19.1525	65	479.167
19.1625	78	631.556
19.1883	143	905.889
19.2958	194	168.667
19.3942	78	1768.56
19.3983	360	23.6667
19.4767	64	7278.5
19.4933	119	403.667
19.6408	89	-2447.44
19.65	72	-3389.56
19.6675	73	-53415.1
19.9192	70	3543.22
20.0308	80	457.278
20.0358	157	-2152.06
20.0592	140	725.333
20.1025	290	54.7222
20.1092	140	-253.667
20.1692	218	-445.056
20.2008	63	130.278
20.26	105	498.667
20.2642	70	7595.17
20.2692	100	9041.56
20.3075	84	24108.8
20.475	84	48000.2
20.4758	174	105086
20.485	206	118.722
20.495	136	209.5
20.5333	145	-177.778
20.545	186	-4472.72
20.5467	110	-327.444
20.5692	202	-158.778
20.58	233	1271.33
20.6483	89	-2898.72
20.6508	148	1500.67
20.6667	75	62736.2
20.6725	143	-647.278
20.6933	149	-1603.94
20.7292	241	64.1111
20.7642	174	7931.78
20.7733	301	487.944
20.7758	212	400.222
20.8017	306	-311.889
20.965	119	3972.22
20.9767	195	704.611
21.0283	209	-447.556
21.0408	76	9920.39
21.1558	173	12502.9
21.1567	191	13308.7
21.16	142	31494.4
21.1792	69	4808.56
21.1992	63	2297.44
21.245	152	1252.61
21.3325	107	746.944
21.3658	220	-2996.61
21.37	70	19953
21.3775	266	-1718.67
21.3808	192	-24807.3
21.4183	106	96.7222
21.4542	77	12507
21.4767	108	87
21.5025	147	-14406.9
21.5683	201	911.5
21.585	140	-1187.22
21.5883	114	-2079.11
21.5925	113	-1424.33
21.5958	200	-6367.67
21.5967	201	-1246.72
21.5983	315	-3818.11
21.6208	172	-2295.83
21.6317	127	-171.111
21.6375	202	-387.056
21.675	316	118
21.7042	112	-830.833
21.7358	316	-366.167
21.7775	120	-493.889
21.8125	138	-263
21.8525	147	-81686.9
21.8683	112	-297.444
22.1258	357	444.5
22.1933	117	-147911
22.21	147	-2.76552e+06
22.2117	146	-61551.6
22.2125	145	-7639.72
22.215	195	-7687.72
22.24	76	-17703.1
22.2442	70	-84726.9
22.2483	72	-193099
22.2517	113	-56407.9
22.2525	115	-117656
22.2542	116	-104291
22.2583	100	-980076
22.2592	133	-884247
22.26	85	-59221.1
22.2767	111	-1816.11
22.2775	77	5912.83
22.2875	75	243251
22.3025	76	13092.7
22.4175	189	72403.7
22.535	68	-3755.72
22.545	203	1026.94
22.5567	176	-3586
22.6817	139	4071.56
22.745	341	-45.2222
22.7617	76	1731.17
22.7742	204	1347.22
22.8367	119	3012.94
22.8392	62	579.333
22.8733	139	4196.28
22.8742	174	25732.5
23.0308	133	18111.7
23.0733	129	1752.94
23.095	73	164755
23.0975	72	3626
23.1033	248	1224.67
23.115	134	3200.67
23.1658	135	609.278
23.1858	160	4740.89
23.2008	65	96.0556
23.2183	100	17751.6
23.3158	161	314.833
23.335	134	1415.11
23.3375	135	239.667
23.3817	103	230
23.3908	130	8736.72
23.4108	81	120.167
23.4233	133	5840.06
23.4383	160	3082.89
23.4592	187	-146.611
23.7983	91	62.6667
23.8758	82	112.056
23.915	67	179.556
23.9358	138	103.556
23.9825	143	275.667
24.075	99	251.056
24.2033	146	-995.889
24.3342	70	-4273.06
24.3392	175	-2318.67
24.3533	176	-1178.11
24.4217	133	5280.06
24.5125	60	-1812.22
24.5175	98	-1052.78
24.5717	170	-323.389
24.6275	169	-349.833
24.6825	204	-2965.17
24.685	191	-1790.67
24.71	192	-187
24.7667	78	-350.667
24.8433	133	-35806.5
24.9233	188	2211.61
25.0825	186	-308.889
25.1575	76	890.278
25.1625	174	-2479.56
25.1742	229	46.7778
25.1783	228	147.111
25.2008	237	22.8333
25.21	66	207.5
25.2117	221	-193.722
25.2258	121	19.8333
25.2542	233	-108.667
25.3067	65	75.2222
25.3208	65	98.3333
25.3492	408	-44.6667
25.3592	198	-228.111
25.3667	192	-232.667
25.3817	291	-240.167
25.3967	219	-788.889
25.4067	69	-429.111
25.42	70	-116.667
25.445	229	-48
25.45	163	-283.667
25.4633	74	-4092.28
25.4642	205	-2897.83
25.465	89	-3472
25.4658	204	-12301.6
25.4675	133	-6381.89
25.4683	119	-545.389
25.4717	90	-326.667
25.4758	146	-219.667
25.5192	204	259.667
25.5725	204	-339.722
25.5733	264	-54
25.6125	86	69
25.6558	62	48.3333
25.7083	305	42.5556
25.7692	82	-250.833
25.8167	450	16.8333
25.8342	166	290.222
25.8367	210	63.5556
25.9933	153	-84.2222
25.9983	62	155.722
26.0008	78	-430.444
26.1658	79	1398.17
26.2725	68	620.833
26.3717	84	2377.11
26.4425	437	26.7222
26.4492	239	71.9444
26.4608	82	-983.222
26.4867	373	14.8333
26.6283	77	3617.44
26.6792	67	-557.611
26.7983	89	-2713.5
26.8933	103	-1920.17
26.9133	119	-71.4444
26.9475	71	157.444
26.9617	63	79.5556
27.0033	147	-5203.22
27.1733	90	-120.111
27.2667	106	27.5
27.2708	151	42.6667
27.3083	61	152.222
27.3325	148	-295.556
27.4075	191	73.6667
27.4225	217	287.722
27.4608	221	68.7778
27.4675	189	45.6667
27.5133	93	107.333
27.5783	109	49.7222
27.5917	60	161.389
27.6425	82	33.6667
27.6475	205	27.7222
27.69	69	117.667
27.6975	67	68.9444
27.8175	149	-155
27.8225	117	-386.389
27.8267	191	216.556
27.8925	293	130.056
27.8983	204	118.333
27.9767	207	87.1667
28.01	77	205.222
28.045	100	-41.2222
28.0483	148	-130
28.0875	89	63.4444
28.09	63	62.6111
28.1608	129	-88.4444
28.1842	75	-192.167
28.1892	537	13.3333
28.19	175	184.389
28.1925	117	254.667
28.1967	160	26.6667
28.2108	135	17.6111
28.3442	225	32.6667
28.4333	82	15.5
28.475	105	144.167
28.4883	77	567.222
28.5117	118	66.3889
28.5975	137	90.3333
28.6167	329	64
28.6992	160	-41.7778
28.77	100	96.5
28.8008	79	179.444
28.9433	100	-36.2222
28.9942	147	1031.67
28.9958	74	583.889
29.01	96	78.1667
29.0467	75	-797.5
29.1758	129	5662.28
29.1767	217	11142.7
29.2025	147	19961.9
29.2117	87	550.111
29.225	181	96.6667
29.2283	222	281.889
29.3225	416	7.66667
29.3458	87	291.889
29.36	88	15.3333
29.3717	217	-370.389
29.415	60	-154.222
29.4217	118	-109.722
29.4242	127	-66.4444
29.4258	119	-89.8333
29.4275	201	-55.8333
29.4317	89	-469.444
29.4325	129	-1259.11
29.4333	87	-1536.89
29.4342	73	-10166.9
29.435	74	-903.722
29.4375	88	-128.722
29.44	82	-77.4444
29.4425	84	-100.611
29.4433	114	-92.6667
29.4508	207	-119.556
29.4542	77	-114.222
29.5517	135	47.1667
29.5558	147	1087.5
29.5658	191	34.2778
29.5875	182	18.8333
29.6925	79	-80.4444
29.8183	151	36.1667
29.8483	209	26.2222
29.8642	134	56.5556
29.9192	267	125.667
29.9408	177	85.6111
29.9942	76	272.389
30.0017	60	531.5
30.0317	260	57.9444
30.055	64	114.722
30.0583	75	569.944
30.0875	133	-50.0556
30.1842	65	42.0556
30.2383	181	21
30.2442	60	131.444
30.245	97	23.8333
30.2492	209	34.8889
30.27	79	68.3889
30.32	127	134.111
30.4425	100	-36.2222
30.5167	193	-37.1111
30.5258	207	-66.6667
30.5667	299	-38
30.5942	149	51.6667
30.6008	262	14.3333
30.7592	97	49.9444
30.7917	77	213.667
30.8667	64	-91.0556
30.8908	256	13.3333
30.995	205	32
31.05	117	322.056
31.0533	191	121.778
31.0567	74	305.5
31.0592	230	21.8333
31.1517	99	66.8333
31.235	64	107.944
31.2792	129	-37.3333
31.3058	93	19.3889
31.41	76	-59.1111
31.4275	65	20.8333
31.4567	64	-71.7778
31.5367	111	115.111
31.5392	76	223.5
31.5483	134	99.4444
31.5492	68	-88.4444
31.755	132	-429.444
31.7975	113	99.7778
31.8192	74	395.722
31.8383	70	48.9444
31.8642	78	-59.7222
31.9142	119	-19.7778
31.9325	81	-22.6667
31.9517	60	41.4444
31.98	134	36.3889
32.0292	76	57.6667
32.0367	75	948.556
32.1042	191	19.0556
32.1358	135	-30.4444
32.2042	193	-48.8889
32.2092	76	103.278
32.235	81	-35.1111
32.3117	92	-22.5556
32.4867	78	37.7778
32.4917	67	44.4444
32.5042	174	19.3333
32.5767	64	98.6667
32.5917	155	12.8333
32.8325	75	-298.556
33.0592	60	63.8333
33.075	99	20
33.1542	63	79.1111
33.2258	204	41.2778
33.2375	89	-45.6667
33.2417	115	45.1111
33.3225	129	44.8333
33.36	221	-25.7778
33.49	241	-139.056
33.5175	62	42.5
33.5792	319	-17
33.735	77	-180.444
33.8758	75	263.333
34.0167	117	64.6111
34.0725	67	122.833
34.1142	133	-70.2222
34.1433	207	-122.111
34.1592	204	8
34.185	64	140.833
34.2525	74	-63.7778
34.2642	207	-53.3889
34.2867	70	24.1667
34.3483	95	-25.2778
34.4258	333	-22.6667
34.5183	147	1235.56
34.5392	322	22.9444
34.5583	133	224.556
34.575	86	20.2778
34.6217	85	44.0556
34.7192	83	25.7222
34.7217	99	59.5
34.795	100	-45.6667
34.8433	75	-800.556
34.9083	134	17.8333
35.05	119	41.9444
35.0592	113	57.7222
35.2533	156	62.6667
35.3575	207	-59.6667
35.4008	218	34.7778
35.4183	61	-51.5556
35.4192	135	-45.3333
35.46	133	197
35.4617	69	97.0556
35.4667	70	67.8889
35.4958	223	31.4444
35.5	165	13.5
35.5275	137	19.5
35.5333	123	17.3333
35.5875	60	85.1667
35.6325	169	103.444
35.6333	147	432.444
35.6383	131	45.5
35.6817	103	222.278
35.6908	221	-24.3889
35.7308	81	34.5
35.735	85	142.444
35.7558	86	32.8889
35.795	222	21.3889
35.8208	204	57.1667
36.1408	115	507.333
36.2258	94	129.944
36.2733	117	-2127.22
36.3383	65	154.889
36.3675	147	-6595
36.6767	204	102.222
36.6975	145	31.6667
36.8975	135	-58.8889
36.9808	85	48
37.0342	166	48.5556
37.0567	64	184.444
37.1325	77	355.889
37.1442	207	94.0556
37.145	267	21.6667
37.1575	221	74.5
37.1792	67	68.5556
37.38	193	-39.2222
37.385	146	38.8889
37.4908	193	87.8333
37.545	147	327.833
37.595	361	44.3333
37.6	137	-28.8889
37.6358	74	-115.611
37.65	81	-44.7222
37.7192	72	49.6667
37.725	75	443.722
37.7725	92	-30
37.8192	87	72.1111
37.8258	127	108.5
37.8408	207	106.778
37.8575	72	239.778
37.9692	64	220
38.12	74	1712.44
38.1508	206	161.778
38.1533	204	1910.61
38.1567	319	118.889
38.16	169	354.833
38.1608	73	19643.7
38.1817	205	534.667
38.2642	64	379.444
38.4275	130	162.889
38.4558	267	80.5
38.4583	75	3984.89
38.4942	299	-137.611
38.605	97	-207.778
38.6158	146	164.5
38.6417	189	-289.167
38.6533	141	184.667
38.7025	221	122
38.7092	130	193.333
38.7475	217	254.944
38.775	189	83.8333
38.7783	191	172.833
38.7825	143	59.3333
38.9458	70	240.778
39.1633	149	-63.3889
39.1642	78	-81.8889
39.1958	117	92.2222
39.2117	61	-67.2222
39.2217	81	-43.2222
39.2258	204	84.5
39.2967	67	37.3333
39.3375	75	425.667
39.3442	136	19.1667
39.3667	265	-10.3333
39.38	355	19.6667
39.3925	133	446
39.4217	85	63.5556
39.4392	243	96.5
39.4508	361	373.722
39.5783	71	122
39.6308	129	121.611
39.6425	80	-34.5556
39.6517	70	66.1111
39.6533	69	220.722
39.6667	75	564.222
39.7417	355	232.222
39.7642	81	-66.9444
39.765	71	31.8889
39.8042	85	46.5556
39.9267	130	36.3889
39.9658	77	265.056
40.0133	207	-90.0556
40.0625	177	53.8333
40.1242	78	-66.2222
40.1575	101	96.2222
40.1625	281	-35.8333
40.1775	113	68.1667
40.1858	111	31
40.1875	89	53.6111
40.1892	265	21.5556
40.2042	61	120.056
40.2125	207	153.556
40.2967	130	34.2778
40.3417	97	19.3889
40.3433	135	135.167
40.3758	70	30.1667
40.3767	61	-65.0556
40.4083	103	98
40.4108	265	-18.4444
40.4308	135	-44.3333
40.4783	69	71.2222
40.49	204	12.3333
40.5058	115	-64.8889
40.5467	96	-72.5556
40.7425	314	15
40.7558	65	56.6667
40.7758	118	16
40.9683	64	229.833
41.0075	113	98.9444
41.0167	60	61.9444
41.0975	92	58.1111
41.23	135	-66.7778
41.2675	134	43.1667
41.3517	75	439.722
41.4383	61	78.8333
41.5258	93	5.16667
41.5558	63	99.1667
41.5733	64	277.111
41.5767	97	61.0556
41.6375	70	79.3333
41.7017	79	-80.3333
41.755	70	69.5556
41.8058	135	63.4444
41.8108	221	113.833
41.9217	103	102.667
41.96	103	-32.7778
41.9775	75	259
41.9883	207	115.667
42.2067	81	122.389
42.2092	85	37.6667
42.2333	63	80.5
42.2833	67	59.7778
42.3708	103	148.833
42.3758	208	22.3889
42.3992	91	-44
42.5125	111	20.9444
42.515	129	44.8333
42.5242	92	42.6667
42.5258	73	262.333
42.5283	133	72.6667
42.6092	285	43
42.6608	94	215.556
42.6683	99	162.722
42.6925	125	69.1667
42.7108	278	38.6667
42.7425	104	95.7222
42.7625	101	97.5556
42.7642	223	33.2222
42.7658	77	528.722
42.7683	94	159.722
42.7692	119	-606.667
42.7842	155	73.2222
42.8325	105	422.278
42.8858	93	-39
42.9017	70	54.0556
42.9733	81	-85.7778
43.0817	74	-79.3333
43.1133	86	13
43.2258	265	-19.9444
43.2517	75	-228.889
43.255	221	261.389
43.275	128	51.8333
43.3625	178	-20.7778
43.3733	269	-26.1111
43.3808	78	-51.6667
43.3933	65	38.8333
43.4008	67	76.5556
43.4925	209	-42.3889
43.5242	85	96.7778
43.5608	65	112
43.6175	135	-77.5
43.6483	67	107.333
43.7533	61	121.667
43.7833	80	-47.2222
43.7917	598	0
43.7917	598	0
43.8542	69	200.833
43.9017	125	43.4444
43.9117	80	-23.1111
43.9333	117	36.7222
43.9758	70	24
44.0667	137	-42.2778
44.105	75	268.611
44.1617	75	-291.167
44.1717	193	46.7222
44.2275	145	13.1667
44.2908	208	79.7778
44.3933	100	-53
44.4275	81	-89.1667
44.4925	74	145.333
44.5133	119	88.3333
44.5283	79	-121
44.6425	137	-49.1667
44.6767	65	38.8333
44.7108	88	45.5556
44.7375	64	144
44.805	137	-38.3333
44.8358	71	93.2222
44.8733	92	57
44.9008	78	-80
44.9317	65	100.167
44.9658	99	65.6667
44.98	103	112.333

## Sheet: Diphen D10
All Metabolites				Increased Metabolites					Decreased Metabolites
Ret(min)	DIPHEN - CTL	DIPHEN Mass		Ret(min)	DIPHEN Mass	DIPHEN - CTL	Metabolites		Ret(min)	DIPHEN Mass	DIPHEN - CTL	Metabolites
8.1	5589.5	63		8.1	63	5589.5			8.39	75	-81752.4
8.11	-834.917	96		8.68	114	14369.6			9.11	79	-56221.8
8.16	50.3333	280		8.82	79	47534.5	carbamate, 3 TMS		9.81	75	-95094.7	acetic acid, 3 TMS
8.17	693.125	96		9.36	79	54048.2			10.4	128	-137838
8.2	-309.542	86		9.42	89	29836			10.4	147	-1.42955e+06	l-Alanine, 2 TMS
8.25	-1453.96	95		9.87	117	8223.25	2,2,4,7-Tetramethyl-3,6,9-trioxa-2-siladecane		11.82	75	-61900.2
8.28	-1438.62	99		9.92	75	34285.8			11.83	147	-192378
8.3	-244.375	203		9.93	79	53133.2	Propanoic acid, 2 TMS		12.84	74	-77691.9
8.3	-5659.79	61		10.64	114	8064	glycine, 2 TMS		12.84	144	-305530	L-Valine, 2 TMS
8.31	-48626.4	75		10.85	78	9885.46			14.02	100	-52725.4	silanol
8.32	2361.5	108		11.12	102	7563.83	Ethanedioic acid, 2 TMS		14.02	-18928.2	160	glycerol
8.37	716.875	98		12.23	89	5253			14.02	-36851.4	116
8.38	3284.08	70		12.24	210	10786.1			17.47	116	-83483.8	l-Alanine, 3 TMS
8.38	-17248.7	157		12.43	221	17138.3	2-Propanol		22.15	61	-64905.8
8.39	-81752.4	75		12.43	100	15020.1			22.15	66	-78452.8
8.4	-485.5	173		12.43	248	6344.46			22.22	134	-140055
8.41	-4134.75	172		12.57	168	6777
8.42	38.8333	194		12.63	192	24332.5
8.43	-2415.04	130		12.64	243	7732.79	2-Butenoic acid, 2 TMS
8.49	516.5	157		13.47	242	7016.71
8.49	-2097.5	203		14.15	202	6745.17
8.51	-1046.83	119		14.51	146	9361.5	L-proline 2 TMS
8.51	-3173	100		14.51	119	5792.75
8.51	-5017.38	158		14.64	193	7132	Butanoic acid, 3 TMS
8.52	262.333	66		14.68	135	10423.8
8.55	-749.375	168		14.68	103	7534.58
8.68	14369.6	114		14.69	133	18695.5
8.68	3370.79	65		14.69	70	13403.6
8.75	129.5	239		14.7	130	124664
8.82	47534.5	79		14.7	77	95878.7
8.83	1670.38	118		14.7	88	22976.9
8.91	-5448.83	94		14.7	95	15785.1	Glycine, 3 TMS
8.91	-5992.38	138		14.7	80	6622.5
8.92	-24373	67		14.7	155	6373.83
8.93	113	197		14.71	132	10351.5
8.93	-13970.2	92		14.71	89	9078.04
8.95	-195.625	172		14.73	102	27955.7
8.96	2970.67	115		14.73	100	12342.3
8.96	652.833	165		14.73	134	6393.62
8.97	39.0833	266		14.75	155	7861.04
9.01	1468.58	102		14.93	135	7036.33	trans-3-Hexenedioic acid, 2 TMS
9.05	813.583	192		14.95	106	6079.5	butanedioic acid
9.05	43.5	237		15.41	84	7119.83	2-butenedioic acid
9.06	1923.21	193		15.41	68	5960.25	serine??
9.07	1254.33	134		17.76	70	39001.7
9.09	-340.917	321		18.57	254	64846	aminoethanethiosulfuric acid
9.1	-793.125	179		18.57	72	21074.5
9.11	-2059.58	104		19.14	223	14839.2	Threonine
9.11	-3488.71	87		19.22	149	5401.67
9.11	-56221.8	79		19.46	64	15969.3
9.13	10.5	274		19.66	74	9569.96
9.16	537.333	111		19.68	61	8430
9.2	3391.5	152		19.86	61	5164.92
9.24	263.167	167		19.91	61	6404.67
9.29	1306.96	160		19.94	72	19228.3
9.33	43.875	212		20.53	116	8686.71
9.36	54048.2	79		20.58	96	18208	Glutamic acid, 3 TMS
9.38	57.3333	208		20.58	214	8091.75
9.42	29836	89		20.72	232	6959.17
9.43	736.042	166		20.73	174	8487.38
9.44	2288.42	90		21.02	70	52229.1	L-Aspartic acid
9.44	1102.79	136		21.99	72	23016.8
9.45	3092.62	80		22	204	93105
9.46	649.667	143		22	117	61897.9
9.47	755.167	154		22	205	39347
9.47	145.792	284		22	217	30938.2
9.47	113.625	300		22	201	28177.9	aminoethanesulfonic acid, 3 TMS
9.49	148.917	180		22	189	20386.6
9.49	-459.125	143		22	172	14241.6
9.5	135.833	285		22	84	14162.2
9.5	24	270		22.05	245	11295.8
9.51	-2179.75	122		22.24	60	94361.3
9.59	168.667	285		22.24	62	5462
9.6	55.7917	185		22.26	133	673667
9.6	-8878.25	100		22.26	119	62537.2
9.62	42.7083	243		22.3	160	187371
9.62	-599.333	107		22.36	75	340233
9.62	-4130.5	77		22.69	75	92967.3
9.63	53.25	286		22.72	132	7626.88
9.65	42.625	186		22.88	86	21470.5
9.68	724.917	152		23.36	78	6179.38
9.68	484.917	159		23.37	106	13599.2	Nicotinic acid
9.69	31.2917	244		23.75	133	9439.71	Butanoic acid, 3 TMS
9.71	-61.25	210		23.76	231	26780.7
9.75	487.458	209		23.76	142	14615.3
9.77	4340.67	89		23.77	75	23576.1	2-Desoxy-pentos-3-ulose, 2 TMS
9.79	-44.0833	285		24.23	74	7399.62
9.81	-95094.7	75		24.47	89	5377.83
9.82	-1726.58	120		24.52	73	259903
9.87	8223.25	117		24.72	147	17674.9	1,2,3-Propanetricarboxylic acid, 4 TMS
9.92	34285.8	75		25.21	70	5015.29
9.92	-253.792	68		25.22	126	22928.9
9.93	53133.2	79		25.23	84	6541.71	9H-Purine, 2 TMS
9.94	-16911.6	75		25.43	103	53284.8
9.97	364.333	207		25.43	113	5337.75
10.01	-19990.8	117		25.44	133	10558.5	Glycoside, 3 TMS
10.03	4884.08	77		25.44	89	10136.6
10.07	534.792	80		26.05	72	8679.67	mannose
10.1	1152.5	102		26.29	69	14838	d-glucose
10.1	760.417	71		26.34	66	21522	d-Galactose, 5 TMS
10.11	2441.58	60		26.38	60	18047.2
10.11	1720.67	86		26.39	61	26797.6
10.12	1223.83	128		26.9	75	37264.4	Ribitol, 5 TMS
10.12	800.417	93		26.92	74	8267.75
10.17	289.875	172		27.63	75	7767.79
10.18	448.5	113		27.9	73	24392.5
10.25	2052.17	110		27.93	75	9570.42
10.26	38.375	257		29.05	73	17115.5	myo-inositol
10.28	2080.62	84		37.21	73	23660.8
10.33	304.5	199
10.4	-250.125	236
10.4	-137838	128
10.4	-1.42955e+06	147
10.41	-2428.25	177
10.41	-2846.42	173
10.41	-24256.3	144
10.42	-4827	176
10.43	-32504.2	115
10.49	-1879.75	130
10.64	8064	114
10.7	-1511.42	223
10.7	-2040.96	207
10.72	-1637.54	204
10.85	9885.46	78
11	348.458	94
11.04	81.3333	138
11.07	44.3333	240
11.12	7563.83	102
11.13	44.5833	284
11.16	-841.5	92
11.23	466.208	188
11.23	198.458	218
11.27	745.375	124
11.27	14.5	362
11.3	341.792	142
11.32	2032.33	160
11.32	1552.04	187
11.34	50.7083	324
11.55	1142.33	233
11.62	1046.17	204
11.67	497.083	214
11.67	-20827.9	77
11.68	-710.375	135
11.73	-914.583	159
11.74	-1406.54	81
11.76	12.6667	515
11.79	383.333	220
11.81	-4175.83	67
11.82	-40945	66
11.82	-61900.2	75
11.83	-8142.83	116
11.83	-33267	148
11.83	-192378	147
11.85	-1120.88	193
11.86	89.5	159
12.15	47.2917	222
12.18	1071.04	69
12.21	-101.958	185
12.22	1349.62	120
12.23	5253	89
12.23	1456.46	106
12.24	10786.1	210
12.36	39.6667	209
12.4	362.083	166
12.4	80.125	319
12.4	65.7917	182
12.41	145.875	340
12.42	828.542	175
12.42	690.375	176
12.42	118	298
12.43	17138.3	221
12.43	15020.1	100
12.43	6344.46	248
12.43	4824.96	168
12.43	2397.67	205
12.43	2216.33	151
12.44	4039.58	207
12.44	2891.75	101
12.44	2672.25	226
12.44	968.125	252
12.44	865.583	95
12.44	810.292	208
12.44	774.958	250
12.44	104.417	405
12.45	73.625	320
12.5	121.375	174
12.57	6777	168
12.58	3292.79	153
12.58	3005.33	244
12.59	3719.5	64
12.59	2472.08	180
12.59	1696.92	316
12.63	24332.5	192
12.63	784.417	222
12.63	43.9167	333
12.64	7732.79	243
12.64	2036.25	137
12.65	242.958	263
12.68	423.792	237
12.82	-40719.3	66
12.84	-2273.54	96
12.84	-2802.71	110
12.84	-22115.2	156
12.84	-77691.9	74
12.84	-305530	144
12.85	-7091.5	116
12.91	2124.21	89
12.93	1975.33	112
12.94	3518.29	83
12.94	2785.96	227
12.98	956.167	98
12.98	144.375	217
13.04	623.333	151
13.13	170.083	157
13.14	-163.875	141
13.16	664.542	69
13.18	187.083	231
13.36	-3235.71	241
13.43	170.375	155
13.44	-104.792	215
13.45	16.1667	363
13.46	292.417	107
13.46	104.208	138
13.46	80.1667	245
13.46	55.5833	166
13.46	23.5	288
13.47	7016.71	242
13.47	2055.58	76
13.47	828.125	90
13.47	548.083	157
13.48	152.583	141
13.48	54.4167	255
13.48	23.7083	258
13.49	34.5833	301
13.51	544.833	221
13.52	441.917	202
13.57	334.583	153
13.57	-198.125	202
13.59	94.5833	173
13.68	-554.458	163
13.81	-40.125	178
13.81	-135.167	120
13.87	-394.042	192
13.91	1959.17	142
13.91	1563.29	67
13.92	627.208	201
13.92	22.1667	165
13.96	2632.12	61
14.02	-4093.88	129
14.02	-18928.2	160
14.02	-36851.4	116
14.02	-52725.4	100
14.15	6745.17	202
14.32	3621.5	60
14.32	-7238.25	105
14.33	4924.33	76
14.35	-1744.17	153
14.43	1849.88	85
14.44	-6734.54	181
14.48	3791	177
14.48	159.583	264
14.48	115.542	224
14.51	9361.5	146
14.51	5792.75	119
14.51	3260.25	221
14.64	7132	193
14.68	10423.8	135
14.68	7534.58	103
14.68	262.208	231
14.69	18695.5	133
14.69	13403.6	70
14.69	2786.33	150
14.69	1870.17	192
14.69	732.25	110
14.7	124664	130
14.7	95878.7	77
14.7	22976.9	88
14.7	15785.1	95
14.7	6622.5	80
14.7	6373.83	155
14.7	3260.62	82
14.7	2457.96	146
14.71	10351.5	132
14.71	9078.04	89
14.71	4105	187
14.71	1121.12	172
14.71	1008.21	267
14.73	27955.7	102
14.73	12342.3	100
14.73	6393.62	134
14.73	2366.62	190
14.73	1150.88	306
14.73	875.333	218
14.73	71.3333	292
14.74	1602.04	177
14.74	1234.83	194
14.75	7861.04	155
14.75	3296.54	225
14.84	-642.583	241
14.85	-3676.88	121
14.93	7036.33	135
14.94	139.75	154
14.95	6079.5	106
14.95	3485.58	142
14.95	1438.96	127
14.95	921.583	159
15.05	1352.21	306
15.1	608.583	247
15.1	427.375	210
15.11	2415.75	208
15.14	702.667	93
15.17	637.667	71
15.18	-701.292	121
15.2	1769.67	100
15.2	806.125	168
15.29	245.292	331
15.34	705.292	330
15.35	865.375	69
15.38	-38.9583	246
15.39	1166.71	172
15.39	1144.83	263
15.39	629.292	130
15.4	2242.33	149
15.4	1692	260
15.4	430.25	261
15.4	108	234
15.41	7119.83	84
15.41	5960.25	68
15.41	3317.88	275
15.41	3145.5	142
15.41	2612.46	158
15.41	2268.04	83
15.41	610.667	245
15.44	2517.67	69
15.44	1125.92	156
15.45	333.5	277
15.47	3678.92	135
15.48	731.208	178
15.49	203.708	237
15.51	765.833	137
15.51	113	289
15.52	37.6667	275
15.52	30.3333	287
15.55	674.417	221
15.56	812.875	174
15.59	2534.71	135
15.63	-23.875	228
15.84	179.375	258
15.87	1304.67	113
15.91	17.8333	371
16.06	262.75	246
16.1	221.833	67
16.12	-178.958	151
16.21	146.25	198
16.21	-48.5833	185
16.23	237.333	151
16.25	94.75	248
16.25	-171.417	69
16.26	91.5	67
16.26	73.25	252
16.32	1859.62	101
16.34	42.5	316
16.36	-156.875	220
16.44	191.25	258
16.57	-475.375	149
16.59	161.833	213
16.59	144.667	140
16.59	-69.25	136
16.65	-2164.58	129
16.66	44.6667	152
16.66	-1699.83	86
16.7	27.8333	62
16.75	151.875	114
16.75	133.625	244
16.76	1242.33	242
16.77	1547.79	99
16.81	-7051.67	89
16.84	49.5	244
16.85	229.5	208
16.85	118.542	292
16.87	1882.58	78
16.88	1212.12	95
16.91	251.292	213
16.92	525.042	142
16.92	234.958	205
16.93	1622.58	174
16.93	381.167	175
16.94	46.0833	217
16.98	229.208	330
17.13	-404.375	96
17.14	-1081.46	63
17.21	-358.792	146
17.23	636.875	99
17.23	312.792	165
17.23	107.667	240
17.28	98	306
17.41	64.7083	309
17.44	3302	138
17.47	-83483.8	116
17.57	628.333	105
17.59	1049.62	330
17.64	368.625	331
17.65	4287.21	186
17.65	2669.08	200
17.65	759.375	187
17.68	4712.17	193
17.68	1102.25	105
17.71	123.708	169
17.71	40.7917	402
17.73	282.625	356
17.74	115.083	357
17.76	39001.7	70
17.79	16.9583	337
17.83	616.75	357
17.86	139.208	358
17.91	-114.667	162
17.93	234.417	109
18.12	763.125	233
18.23	-7651.88	182
18.28	143	354
18.32	2125.17	193
18.33	137.542	391
18.51	-4164.12	85
18.57	64846	254
18.57	21074.5	72
18.62	-1539.04	188
18.74	-136.625	331
18.99	-271.292	214
19.03	-11851.7	79
19.04	-630.042	233
19.1	826.083	120
19.11	144.333	259
19.14	14839.2	223
19.15	1543	163
19.22	5401.67	149
19.22	2028.12	319
19.31	-11180.5	79
19.42	1205.33	167
19.46	15969.3	64
19.46	718.833	314
19.53	223.875	288
19.55	73.5417	293
19.62	4838.67	254
19.66	9569.96	74
19.66	654.375	331
19.66	481.083	219
19.67	4815.79	86
19.68	8430	61
19.68	384.958	307
19.69	3402.96	149
19.69	393.5	189
19.69	284.583	124
19.73	181	124
19.75	1407.83	76
19.8	4743.21	61
19.84	172.083	240
19.86	5164.92	61
19.87	-69.9583	136
19.91	6404.67	61
19.94	19228.3	72
19.94	1902.92	68
19.95	-55.5	226
19.96	4837.92	85
19.98	1329.12	140
20.03	1262.5	299
20.03	147	250
20.31	206.5	81
20.34	216.25	67
20.35	513.833	330
20.36	302.292	125
20.44	55.5	323
20.53	8686.71	116
20.57	409.5	124
20.58	18208	96
20.58	8091.75	214
20.63	164	329
20.72	6959.17	232
20.73	8487.38	174
20.75	118.333	125
20.77	256.417	229
20.78	486.208	272
20.86	119.958	123
20.95	547.083	241
20.99	-11163.8	158
21	-2332.5	150
21.02	52229.1	70
21.03	-3324.25	204
21.09	-917.75	122
21.1	-179.917	166
21.11	3691.33	241
21.15	2959.5	140
21.2	1165.92	241
21.26	-8695	170
21.32	-3562.88	164
21.52	2547	61
21.52	502.833	204
21.55	3170.17	247
21.58	67.3333	421
21.65	4233.92	139
21.65	3878.96	61
21.85	113.125	330
21.87	-375.375	315
21.93	41.7917	297
21.98	1932	200
21.99	23016.8	72
21.99	4258.21	113
21.99	3820.83	207
21.99	3065.29	219
21.99	936.667	303
22	93105	204
22	61897.9	117
22	39347	205
22	30938.2	217
22	28177.9	201
22	20386.6	189
22	14241.6	172
22	14162.2	84
22	2429.17	330
22.02	32.625	236
22.03	3023.33	106
22.04	880.167	274
22.05	11295.8	245
22.06	313.667	112
22.13	332.583	201
22.15	-5088.46	62
22.15	-6734.08	67
22.15	-64905.8	61
22.15	-78452.8	66
22.16	724.333	247
22.19	-11765.1	123
22.2	3237.38	203
22.2	-27214	77
22.22	-140055	134
22.24	94361.3	60
22.24	5462	62
22.26	673667	133
22.26	62537.2	119
22.27	-3895.71	251
22.3	187371	160
22.36	340233	75
22.4	1497.92	332
22.51	2928.67	215
22.59	2483.83	251
22.69	92967.3	75
22.72	7626.88	132
22.73	61.5	201
22.76	501.708	121
22.79	1719.25	170
22.8	175.875	284
22.86	1184	142
22.88	21470.5	86
23.14	2660	114
23.14	1208.67	68
23.2	-129.458	195
23.36	6179.38	78
23.36	1231.5	221
23.37	13599.2	106
23.37	823.292	107
23.38	2750.54	129
23.39	448.458	180
23.39	331.875	136
23.39	75.2917	224
23.44	198.167	185
23.47	7.5	167
23.51	-1195.75	69
23.57	1970.17	75
23.58	153.333	61
23.61	74.875	347
23.68	1634	89
23.7	-75.6667	201
23.74	2213.58	116
23.74	1720.21	243
23.74	704.333	189
23.75	9439.71	133
23.75	708.083	111
23.75	509.833	80
23.76	26780.7	231
23.76	14615.3	142
23.76	4318.12	95
23.76	2155.79	217
23.76	2019.04	126
23.76	1363.96	99
23.76	1253.83	119
23.77	23576.1	75
23.77	331.542	405
23.78	2622.38	148
23.78	1553.75	71
23.78	882.875	91
23.78	380.333	227
23.79	3645.17	61
23.8	773.833	96
23.8	374.125	145
23.8	277.042	120
23.81	930.75	188
23.81	87	260
23.84	-598.292	72
23.91	103.583	83
23.96	2857.33	180
23.99	3454.96	148
23.99	713.542	206
23.99	176.167	181
24	387.75	376
24	387.042	97
24	146.542	151
24.08	-795.25	153
24.16	1974.67	78
24.16	157.667	207
24.18	329.583	189
24.19	-560.5	216
24.22	537.125	141
24.23	7399.62	74
24.24	3453.75	89
24.26	-10192.4	74
24.3	739.833	129
24.34	449.75	218
24.45	4378.08	95
24.46	3182.25	117
24.46	1954.46	231
24.46	1700.12	199
24.46	1524	129
24.47	5377.83	89
24.47	335.083	163
24.5	-3493.71	128
24.51	390.25	180
24.52	259903	73
24.52	4303.71	131
24.56	-5645.5	133
24.62	135.167	247
24.65	1804	99
24.67	127.792	422
24.68	3148.04	102
24.69	1390.17	258
24.7	946.833	141
24.71	527	229
24.72	17674.9	147
24.72	2700.21	89
24.73	1220.46	112
24.82	240.083	328
24.85	21.5	379
25.12	714.5	67
25.21	5015.29	70
25.21	2344.5	85
25.21	2079.88	127
25.21	624.25	246
25.22	22928.9	126
25.22	3303.79	82
25.22	1831.54	96
25.22	1165.42	245
25.23	6541.71	84
25.23	3212.29	129
25.24	399.708	181
25.36	185.792	220
25.39	463.125	184
25.42	2744.54	265
25.42	459.042	120
25.42	399.833	125
25.42	241.583	255
25.43	53284.8	103
25.43	5337.75	113
25.43	3334.5	189
25.43	2063.21	308
25.43	1092.96	91
25.43	963.375	309
25.43	400.458	150
25.44	10558.5	133
25.44	10136.6	89
25.44	3047.88	205
25.44	2139.08	60
25.44	1251.17	116
25.45	1138.29	76
25.45	333.417	109
25.45	319.625	203
25.46	690.208	65
25.46	36	251
25.48	396.667	166
25.52	58.5833	311
25.55	-230.25	88
25.62	36.4583	521
25.78	124.208	219
26.05	8679.67	72
26.05	1461.75	68
26.06	4256.38	106
26.12	91.3333	405
26.24	278	267
26.28	31.3333	527
26.29	14838	69
26.34	21522	66
26.34	62.6667	416
26.38	18047.2	60
26.38	-4510.42	156
26.39	26797.6	61
26.42	604.958	182
26.48	2047.42	70
26.48	1624.29	67
26.48	753.292	98
26.49	96.9167	290
26.51	164.875	214
26.54	389.5	243
26.55	172.833	255
26.61	-183.875	195
26.65	622.458	195
26.65	117	310
26.73	1292.88	69
26.75	986.167	87
26.8	1916.5	219
26.88	1076.46	104
26.9	37264.4	75
26.9	3443	204
26.9	1128.88	91
26.91	253.083	183
26.92	8267.75	74
26.92	2754.04	72
26.92	1183.83	207
26.93	1171.96	87
26.94	3246.88	148
26.95	3304.79	66
26.95	2596.46	204
26.95	133.5	208
26.96	4383.38	103
26.98	34.8333	183
27	105.708	309
27.01	37	225
27.02	-109.167	202
27.18	54.1667	295
27.2	253	84
27.28	320.167	60
27.33	49.0417	140
27.36	157.667	77
27.43	71.5	248
27.46	252.542	76
27.54	268.542	72
27.57	27	175
27.58	123.875	119
27.58	-104.125	72
27.59	213.708	65
27.59	129.333	80
27.61	467.708	174
27.62	86.1667	91
27.63	7767.79	75
27.64	87.8333	383
27.73	115.833	77
27.73	37.5	184
27.79	75.1667	402
27.8	26.7917	403
27.86	422.333	115
27.87	450.25	101
27.88	905.25	204
27.9	24392.5	73
27.9	94.5	190
27.93	9570.42	75
27.93	120.167	228
27.94	136.708	166
28.05	43.4583	148
28.12	90.2917	70
28.15	328.5	148
28.15	221.417	129
28.17	259.5	217
28.2	40.8333	155
28.21	64.8333	169
28.22	269.042	117
28.22	219.333	87
28.23	206.333	100
28.28	34.0833	170
28.3	82.1667	307
28.31	1027.12	75
28.31	46.875	176
28.34	51.5	135
28.34	-115.083	333
28.56	58.5	259
28.58	289.625	76
28.6	46.8333	151
28.61	295	95
28.62	99.6667	150
28.78	143.042	244
28.79	57.8333	85
28.99	111	133
29.03	23.4583	171
29.05	17115.5	73
29.06	1089.21	74
29.06	270.5	89
29.06	183.333	143
29.27	117.792	113
29.28	89.9167	68
29.66	126.25	105
29.7	-60.8333	281
29.72	76.25	168
29.73	75.6667	142
29.76	117.375	86
29.9	299.708	395
29.92	95.375	104
30.08	72.1667	62
30.12	2912.12	147
30.18	45.3333	266
30.27	-94.2917	64
30.34	93	160
30.39	393.042	143
30.42	144.5	71
30.44	115.5	81
30.44	31.6667	164
30.49	59.125	79
30.5	179.333	61
30.59	22.875	354
30.6	23.5	178
30.6	-37.625	62
30.63	53.75	156
30.66	-123.583	77
30.76	85.7917	208
30.84	102.458	295
30.91	-20.75	65
30.95	100.167	115
30.95	63	104
30.97	39.5	90
31.02	52.5833	207
31.16	108.833	207
31.26	3647.38	147
31.26	695.333	148
31.26	244.292	72
31.27	324	115
31.29	811.833	133
31.29	106.958	128
31.32	197.708	88
31.32	70.9583	162
31.33	123.583	221
31.34	139.375	83
31.34	59.6667	70
31.35	21.5	245
31.36	91.625	157
31.37	46.9167	63
31.37	34.6667	173
31.63	367.667	117
31.84	118.5	100
31.87	360.667	77
31.87	-64.625	60
31.88	-41.625	113
31.89	89.375	104
31.89	-120.583	84
32	90.1667	133
32.02	17.5	295
32.11	-53.125	101
32.23	36.1667	168
32.23	-56.5833	221
32.25	605.667	75
32.31	91.5	142
32.39	246.875	141
32.4	39.8333	335
32.5	3085.17	75
32.53	30.1667	108
32.55	46.6667	120
32.58	164.667	89
32.59	372.75	74
32.61	2560.75	75
32.67	770.667	147
32.68	-562.625	147
32.69	43.9167	333
32.72	-82.2917	66
32.88	57.75	207
32.88	42.2083	119
32.89	25.3333	106
33.16	626.917	147
33.17	150.042	148
33.18	161.958	133
33.21	47.9583	146
33.23	46.75	142
33.24	71.9583	128
33.24	47	60
33.26	14.8333	426
33.28	7.5	406
33.3	170	74
33.31	53.6667	79
33.31	-26.625	119
33.32	9.16667	350
33.53	23.6667	193
33.54	-105.75	67
33.55	-96.2083	79
33.6	-21.5	90
33.67	113.167	74
33.75	421.583	103
33.78	-30.625	158
33.81	-50.75	64
33.89	-38.5	207
33.99	-47.125	135
34.03	-229.625	299
34.11	52.3333	205
34.18	35.7083	63
34.19	48.6667	183
34.28	29.875	208
34.31	45.6667	129
34.33	65.5	183
34.43	37.3333	149
34.45	47.6667	91
34.5	-41.875	157
34.62	92.25	101
34.62	40.6667	149
34.66	-72.125	281
34.68	66	148
34.72	-223.583	207
34.75	35.6667	243
34.79	32.5	193
34.91	73.8333	115
35.06	-25.5417	65
35.09	67.7917	64
35.12	-75.125	207
35.14	-78.75	100
35.15	75.5833	207
35.19	-189.375	69
35.25	30.1667	299
35.3	613.667	103
35.33	556	75
35.34	49.3333	209
35.35	95.3333	81
35.36	20.6667	106
35.52	126.125	72
35.53	418.125	148
35.54	420.333	149
35.55	53.7083	221
35.63	-42.2917	121
35.69	54.9583	82
35.75	163.417	74
35.78	52.7917	168
35.78	-26.5	96
35.79	63.2917	207
35.84	-45.625	97
35.93	-74.4167	64
36.18	336.25	235
36.32	-2285.83	218
36.35	58.25	289
36.46	645.125	260
36.55	2650.54	281
36.55	-5537.62	147
36.59	963.667	101
36.75	785.417	72
36.91	-45.25	65
36.95	32.6667	88
36.97	513.583	218
37.01	3332.79	75
37.03	2531.67	103
37.07	149.917	143
37.21	23660.8	73
37.21	449.833	117
37.21	211.542	69
37.24	909.333	129
37.24	-102.458	76
37.33	66	85
37.35	303.5	131
37.37	176.958	169
37.38	1942.58	103
37.4	33.5	62
37.42	60.5	81
37.44	597.75	75
37.45	823.917	103
37.49	397.333	230
37.49	100.333	89
37.5	-571.375	75
37.51	262.083	204
37.52	51.7083	91
37.65	589.333	103
37.7	59.5417	208
37.71	316.667	133
37.73	124.5	148
37.8	35.5	63
37.85	23.3333	136
37.89	23.1667	86
37.91	105.875	117
37.92	218.833	103
37.99	66	133
38.08	173.5	230
38.42	155.917	70
38.5	53.5	146
38.63	69.5	307
38.92	14.5	211
39.08	64.1667	149
39.09	218.5	74
39.12	1919.29	147
39.23	-1153.33	147
39.51	97.3333	89
39.51	42.2917	81
39.52	-30.2083	65
39.53	-39.875	92
39.55	29.5	355
39.7	66	64
39.87	-122.875	64
40.09	71	207
40.1	175	75
40.11	-30.5	92
40.31	39.3333	61
40.4	17	222
40.49	33	129
40.51	69	103
40.56	-69.5833	62
40.79	-39.375	92
40.82	-88.4583	79
40.82	-95.0833	78
40.87	-38.25	72
41.03	-199.25	77
41.06	50	72
41.08	145.083	148
41.09	-72.375	76
41.21	100.917	133
41.33	35	165
41.44	64.625	193
41.47	129.417	64
41.54	-134.792	207
41.56	-104.625	64
41.84	76.6667	74
42.03	-73	296
42.15	88.9583	67
42.18	216.25	207
42.2	48	135
42.23	14.8333	85
42.25	-245.625	207
42.26	-38.5	112
42.3	-85.375	131
42.32	21.625	106
42.37	70.6667	207
42.49	137	61
42.53	82.25	78
42.53	35.7917	193
42.54	-94	76
42.65	243.417	75
42.66	66.3333	133
42.73	-66.375	208
42.76	-51	61
42.77	62.8333	193
42.77	-155.958	64
42.88	-40.75	76
42.9	23.3333	85
42.94	-55.0833	60
43.01	75.5833	81
43.07	-86.9167	76
43.12	-85.875	207
43.13	385.333	73
43.13	-36.375	65
43.17	22.3333	192
43.2	165.417	148
43.23	-51.75	121
43.26	60.3333	81
43.26	14.1667	269
43.29	-122.625	66
43.31	48.0417	62
43.31	-316.792	75
43.4	-88.1667	76
43.42	62.9583	89
43.47	57.1667	79
43.51	6.16667	106
43.52	-29.125	341
43.57	-386.792	73
43.58	-43.5	78
43.85	49.6667	137
43.89	37.1667	223
43.95	-58.875	89
43.99	72.8333	193
44.07	29.1667	135
44.1	-43.375	135
44.15	56.2917	119
44.16	-62.875	81
44.24	59.3333	129
44.27	30	69
44.28	18.5	118
44.3	233.125	147
44.31	-90.125	64
44.34	35.1667	70
44.36	504	73
44.37	228.458	77
44.37	88.3333	148
44.39	33.8333	96
44.4	-53.625	177
44.54	65.3333	193
44.55	406.167	73
44.65	561.125	147
44.71	31.6667	95
44.85	89.8333	133
44.87	58.1667	193

## Sheet: Diphen D18
All Metabolites				Increased Metabolites					Decreased Metabolites
RT (min)	diphen - CTL	Mass		RT (min)	Mass	diphen - CTL	Metabolites		RT (min)	Mass	diphen - CTL	Metabolites
8.09917	76.9167	151		8.6875	73	50543.2			8.51333	78	-63021.2
8.4125	129.417	183		8.68833	154	30415			8.7875	71	-6377.96
8.44333	78.875	238		8.68917	153	89218			10.0358	165	-5614.38	acetic acid
8.4575	70.6667	167		8.69	152	586547			12.8075	79	-7798.25	L-Valine, 2 TMS
8.475	48.0833	300		8.8275	147	40491			15.765	248	-6797.62
8.4925	2429.29	96		8.87333	147	38861.8			15.7658	247	-48232.2
8.49833	2238.92	65		9.02167	79	13959			15.7667	76	-41618.8
8.50417	1706.12	93		9.34333	75	32865.9	trisiloxane		15.7675	75	-581321	2-Butenedioic acid, 2 TMS
8.51333	-63021.2	78		9.34417	73	204586			15.7683	73	-835416
8.51417	3560.29	190		9.345	119	5540.08			20.9933	188	-8290.21
8.5225	159.458	290		9.59667	225	6602.96	Ethanedioic acid, 2 TMS		21.2042	157	-11548
8.52333	178.417	295		10.085	79	37456.9			21.2892	97	-10009.8
8.525	523.458	220		10.14	102	47022.7	l-Alanine, 2 TMS		23.1083	64	-11575.4
8.54917	63.2917	273		10.8625	116	6450.25
8.5525	1696.54	208		10.9008	79	23056.1
8.62	125.417	299		11.64	84	30658	sulfate, 2 TMS
8.62083	503.917	64		11.8125	148	9391.33
8.6275	1168.83	71		11.9233	98	8496.92
8.64417	41.6667	269		11.9308	73	540557
8.66333	-2155.38	127		11.9317	221	64381.8	Phosphoric acid, 2 TMS
8.6875	50543.2	73		11.9567	79	23417.2
8.68833	30415	154		12.1117	79	21427.5
8.68917	89218	153		12.1292	210	7395.25	Ethanimidic acid, 2 TMS
8.69	586547	152		12.1558	131	6814.46
8.73083	15	173		12.19	89	5271.29
8.77667	888.167	130		12.26	241	10102.1
8.7775	4044.17	71		12.27	117	5539.17
8.7875	-6377.96	71		12.2708	149	20122.2	Ethanedioic acid, 2 TMS
8.8275	40491	147		12.2717	75	61620.8
8.87083	109.333	94		12.2725	73	253037
8.87333	38861.8	147		12.2733	84	8612.75
8.87833	85.9167	143		12.3217	74	14727.5
8.88917	46.625	201		12.3225	73	178290
8.91167	1980.71	131		12.3233	77	27213.8
8.98667	82.8333	151		12.3317	241	9350.5
9.02167	13959	79		12.4142	75	5259.62
9.04417	2837.12	131		12.4492	241	7352.33
9.09	107.125	181		12.5517	192	14946.3
9.20083	1019.17	81		12.755	77	6088.5
9.20917	202.75	144		13.5542	147	6391.67
9.2125	81.5	112		13.9767	79	27405.7
9.2275	34.0417	285		13.9775	75	156199
9.2575	-263.917	63		13.9842	61	44601	silanol
9.33417	25.0833	245		13.985	76	9521.04
9.3425	1822.54	224		13.9867	72	32889.3
9.34333	32865.9	75		13.9917	77	72852.9
9.34417	204586	73		14.0842	158	7234.08	glycerol
9.345	5540.08	119		14.2358	191	10910.5
9.34667	4601.67	89		14.2383	300	21553	L-isoleucine
9.34833	123.542	141		14.2533	225	5171.46
9.4675	41.8333	165		14.3308	79	15390.2
9.50167	-141.417	98		14.4225	89	6484.33
9.59667	6602.96	225		14.4233	119	7083.79	L-proline
9.59833	3350.08	318		14.4258	147	30573.5
9.615	891.333	207		14.6292	84	8493.04
9.62	195.208	94		14.6383	73	119928	Propanoic acid, 3 TMS
9.63417	31	232		14.65	75	13599.2
9.6475	3542.21	105		15.3667	84	5033.21	silanol
9.665	456.167	120		15.425	177	7961.21	Pyrimidine, 2 TMS
9.8175	-134.583	283		15.7025	240	6351.79	silanol
9.84	-2488.5	77		16.8433	100	15638.2
10.0258	1252.83	102		16.8942	160	8206.75
10.0358	-5614.38	165		17.3558	79	9573.88
10.085	37456.9	79		17.3608	66	23815.8	á-Alanine, 2 TMS
10.1358	3342.83	93		17.4983	147	9355.17
10.14	47022.7	102		17.535	100	8271.46
10.1992	118.625	223		17.5408	147	14108.1	Butanoic acid, 3 TMS
10.2108	513.583	195		17.5825	186	5048
10.2342	4440.88	163		17.6333	73	56193.3
10.2692	75.4583	280		17.6358	75	20671.5
10.3158	302.667	96		17.8567	79	11163
10.3475	958.875	132		17.8733	147	40590.7	aminoethanethiosulfuric acid, 1 TMS
10.3642	896.292	105		17.9825	248	7157.29
10.3825	64.375	265		17.9858	175	8620.58
10.4758	78.5417	211		17.9867	174	45693.9
10.545	-39.875	290		18.0325	61	149098
10.585	268.875	239		18.0358	83	6523.33
10.5867	1041.29	94		18.1592	123	8146.92	Propanoic acid, 3 TMS
10.6017	60	234		18.2725	114	22163.1
10.7008	4903	116		18.2733	232	180183
10.7425	1654.33	131		18.2742	334	19298.2	L-Aspartic acid, 3 TMS
10.8025	74.4583	80		18.275	70	406826
10.8317	-83.2917	81		18.2767	163	18344
10.8625	6450.25	116		18.29	116	63203
10.9	31.3333	221		18.2958	153	18696.3
10.9008	23056.1	79		18.8558	100	10446.2	Butanedioic acid
10.925	70.6667	241		19.5817	74	5950.83	Butanoic acid, 3 TMS
10.9283	92.0417	188		19.815	71	6907.12
10.9833	1863.71	69		19.9883	69	12281.4
11.0617	186.708	276		20.4192	70	10275
11.0625	324.042	242		20.4825	71	5007.67
11.1617	390.167	135		20.4908	82	8159.79
11.1717	1343.33	232		20.4942	174	9688.75	L-lysine
11.1967	838.542	136		20.4958	96	43163.8
11.2617	134.167	103		20.5267	84	22780.2
11.2783	87.9583	173		20.6183	156	16132.1
11.4292	187.5	225		20.6425	174	8630.29
11.4592	210.042	142		20.6517	74	5622.42
11.4867	104.333	143		20.9133	130	9599.04
11.5292	463.625	214		21.0592	133	12879.2
11.64	30658	84		21.0617	149	7024.71	L-Aspartic acid, 3 TMS
11.6417	669.042	68		21.0717	103	5181
11.6783	435.208	167		21.085	144	8441.42
11.735	105.667	254		21.1075	131	9290.88	Glutamic acid, 3 TMS
11.8125	9391.33	148		21.11	148	10019.2
11.8158	4572.42	149		21.285	74	299416
11.82	2993.71	61		21.2858	75	932147
11.9017	573.375	251		21.3367	361	5271.38
11.9233	8496.92	98		21.3375	81	18302.3
11.9242	3973	256		21.3392	243	8710
11.9308	540557	73		21.35	97	9995.67
11.9317	64381.8	221		21.6617	139	6078.58
11.9383	236.667	265		21.6692	75	25554.7
11.9567	23417.2	79		21.8483	129	57374.3
11.99	419.042	118		21.8492	101	47008.4	3,8-Dioxa-2,9-disiladec-5-ene
11.9975	144.5	169		21.8525	102	6825.96
12.0008	1179.67	63		22.025	73	47795.7
12.025	2253	131		22.2975	87	37166.2
12.0308	511.417	228		22.3067	73	2.45768e+06
12.0375	305.083	177		22.3117	85	33812.7	aminoethanesulfonic acid, 3 TMS
12.0833	707.75	113		22.3267	70	43681.2
12.0975	1484.62	119		22.33	64	65906.2
12.1033	87	168		22.3467	99	18950.2
12.1092	1373	121		22.3625	74	359036
12.1117	21427.5	79		22.3675	79	16773.7
12.1225	879.667	69		22.3867	245	18198.3
12.125	1175.42	137		22.8175	327	6100.67
12.1258	2674.62	211		22.8775	75	26638.2
12.1275	2967.54	136		23.2533	73	21663.1
12.1283	4401.5	224		23.29	78	5872.83
12.1292	7395.25	210		23.2908	106	12267.2
12.1308	112.167	110		24.4275	70	5454.5
12.1558	6814.46	131		24.43	75	33021.2
12.1775	334.042	191		24.4308	108	23948.5
12.19	5271.29	89		24.4317	73	121280
12.195	1227.21	152		24.4825	70	5233.21
12.2117	751.292	151		24.8325	259	32870.2
12.2458	3159.29	227		24.8333	241	5870.42	DL-Ornithine, 4 TMS
12.26	10102.1	241		24.835	215	12768.9
12.2625	268.75	212		24.8708	245	11816.8
12.265	929.875	176		24.8717	126	129317	1,2,3-Propanetricarboxylic acid
12.27	5539.17	117		24.8967	82	21231.6	citruline
12.2708	20122.2	149		25.1458	73	59509.2
12.2717	61620.8	75		25.15	70	11502.9
12.2725	253037	73		25.1517	244	19956.2
12.2733	8612.75	84		25.1708	74	7488.04
12.2742	686	243		25.2075	126	20953.8
12.3175	3007.62	89		25.2183	75	11035.1
12.32	1444.5	71		25.9892	106	5489.54	d-Glucose, 5 TMS
12.3208	2891.42	87		27.3158	73	5194.92
12.3217	14727.5	74		27.4992	93	5103.88
12.3225	178290	73		29.8842	73	33858.2	d-Galactose, 5 TMS
12.3233	27213.8	77		36.5925	73	13558.6
12.3242	4405.62	191		14.6642	4267.33	135	glycine
12.325	370.25	229
12.3258	164.458	405
12.3267	1488.29	152
12.3275	39.7917	214
12.33	448.458	212
12.3317	9350.5	241
12.3342	58.7917	280
12.37	105	210
12.3875	331.5	177
12.405	546.208	121
12.4142	5259.62	75
12.4258	1023.96	115
12.43	958.875	105
12.4358	692.042	195
12.4425	517.917	132
12.4492	7352.33	241
12.4542	1076	87
12.4775	813.792	121
12.4808	69.4583	125
12.4842	672.167	117
12.545	2435	221
12.5458	1076.38	224
12.5517	14946.3	192
12.5808	-34.4583	395
12.755	6088.5	77
12.8075	-7798.25	79
12.8225	-489.333	85
12.8317	1399.79	105
12.8367	-1847.33	82
12.8575	391.167	78
13.0292	301.958	107
13.0625	-111.083	260
13.1033	1080.67	207
13.105	125.875	295
13.1125	-192.583	170
13.1192	113.542	181
13.3125	49.6667	167
13.3367	45.9167	216
13.3717	101.667	251
13.3917	-784.583	133
13.3933	660.542	102
13.395	2757.29	192
13.3958	518.083	134
13.3975	542.25	63
13.4	309.333	114
13.4017	75.7083	106
13.4208	28.25	263
13.505	-70.4583	80
13.5525	827.417	89
13.5542	6391.67	147
13.5592	4268.75	75
13.5733	633.875	241
13.5775	935.625	193
13.5967	42.0833	156
13.6383	41.9583	114
13.6783	68.8333	102
13.7042	90.5417	165
13.7225	152.25	112
13.8208	220.542	249
13.8258	317.5	179
13.9767	27405.7	79
13.9775	156199	75
13.9833	3379	62
13.9842	44601	61
13.985	9521.04	76
13.9867	32889.3	72
13.9917	72852.9	77
14.0842	7234.08	158
14.14	578.833	80
14.2258	4429.58	119
14.2358	10910.5	191
14.2383	21553	300
14.2517	1743.58	302
14.2533	5171.46	225
14.28	3255.79	123
14.3308	15390.2	79
14.335	2414.75	69
14.3617	199.042	174
14.3817	-152.875	203
14.4225	6484.33	89
14.4233	7083.79	119
14.4258	30573.5	147
14.5258	1756	89
14.5708	481.583	132
14.5742	274	189
14.5925	604.333	149
14.605	481.167	188
14.6158	2014.17	144
14.62	3327.83	89
14.6217	1830.33	151
14.6225	1228.08	195
14.6233	47.5	199
14.6292	8493.04	84
14.6325	2115.5	225
14.6383	119928	73
14.6392	4924.67	155
14.64	4581.75	67
14.6408	1457.46	161
14.6483	200.292	231
14.65	13599.2	75
14.6508	133.792	258
14.6517	722.125	163
14.6592	4933.33	107
14.6608	91.0833	232
14.6642	4267.33	135
14.6758	56.5417	235
14.6792	65.125	234
14.7433	34.4167	377
14.9067	-530.417	182
14.9817	55.1667	385
14.9983	478.792	195
15.0133	129.167	218
15.1167	-188.083	172
15.1417	3613.54	75
15.1575	1790.79	100
15.1617	4416.25	77
15.1625	183.292	331
15.1633	157.875	172
15.1658	532.042	330
15.2708	-272.708	195
15.3467	964.583	263
15.3517	1422.88	193
15.3592	850.625	149
15.3617	759.375	60
15.3667	5033.21	84
15.3675	4350.29	68
15.3683	1784.67	114
15.3708	72.2083	230
15.39	51.2083	155
15.3917	86.8333	315
15.4167	3444.29	77
15.4192	133.208	289
15.425	7961.21	177
15.4325	523.5	104
15.5042	2420.54	70
15.5058	424.083	188
15.5375	140.792	166
15.5558	79.625	198
15.585	-166.375	94
15.6167	-371.375	89
15.6325	102.917	262
15.65	1163.92	211
15.7025	6351.79	240
15.7092	921.708	255
15.7117	260.917	256
15.7642	-1153	249
15.765	-6797.62	248
15.7658	-48232.2	247
15.7667	-41618.8	76
15.7675	-581321	75
15.7683	-835416	73
15.7692	-2044.67	93
15.7808	25.6667	398
15.8108	123.667	91
15.8317	32.1667	122
15.935	499.375	93
15.9592	275.333	314
16.045	169	300
16.0583	241.542	180
16.0633	31.0833	173
16.0925	-145.25	66
16.1	67.6667	78
16.185	128.042	198
16.2242	54.7917	155
16.3033	1213.42	174
16.305	1641.67	160
16.3083	42.0833	277
16.3133	264.125	88
16.4383	98.6667	108
16.4425	452.625	242
16.4433	3370.67	240
16.445	558.292	168
16.4458	534	255
16.4475	191.792	181
16.4567	89.7917	257
16.4583	231.083	152
16.4592	887.833	254
16.4617	127.458	182
16.4625	120.375	169
16.4642	140.625	138
16.465	209.375	238
16.4667	204.208	111
16.49	25.7917	317
16.5125	32.9167	111
16.5375	996.958	133
16.545	240.583	98
16.5617	243.292	211
16.6517	31.875	387
16.6867	91.7917	214
16.7708	-4428.58	72
16.7725	-432.125	307
16.7733	-878.75	306
16.835	58.75	272
16.8433	15638.2	100
16.8442	3715.29	243
16.845	814.125	258
16.8725	270.583	174
16.8858	284.292	263
16.8875	108.583	235
16.8883	425.042	94
16.8933	1090.33	144
16.8942	8206.75	160
16.8958	390.75	162
16.8967	357.083	234
16.8975	2155	190
16.9008	941.167	134
16.9033	421.167	191
16.9192	173.208	231
16.9208	126.75	330
16.9275	778.5	115
16.9342	32.6667	264
16.975	90.3333	168
16.9908	105.125	286
17.0275	403.292	267
17.0475	-273.667	67
17.0617	-78.8333	336
17.0658	1818.38	64
17.0925	-1510.71	72
17.1475	1156.12	100
17.1792	2665.17	64
17.1825	-69.875	65
17.2067	141.625	119
17.2325	482.375	148
17.3317	57.75	358
17.3392	3979.29	64
17.3558	9573.88	79
17.3575	777.667	65
17.3608	23815.8	66
17.3683	-1179.38	64
17.4292	1835.67	68
17.445	16.1667	403
17.46	-102.333	205
17.4658	3645.38	77
17.4983	9355.17	147
17.5242	2357.25	69
17.5283	961.625	330
17.535	8271.46	100
17.5408	14108.1	147
17.5467	1710.83	99
17.5542	214.25	160
17.5792	686.208	187
17.5808	348.5	136
17.5817	3497.33	200
17.5825	5048	186
17.5833	3916.42	96
17.5933	714.417	97
17.6125	270.083	159
17.6142	150.875	151
17.615	880.625	81
17.6167	81.4167	429
17.6208	301.333	194
17.6233	4173	193
17.6242	872.792	105
17.625	821.333	355
17.6258	863.917	80
17.6275	1731.79	83
17.6283	1393.08	67
17.63	600.125	114
17.6308	374.458	143
17.6333	56193.3	73
17.6358	20671.5	75
17.6417	212.917	232
17.7467	3460.5	77
17.7492	48.5417	94
17.7667	195	185
17.7733	128.875	358
17.7758	691.292	165
17.8233	792.167	156
17.8267	1793.67	257
17.845	1097.62	134
17.8458	4612.54	71
17.8492	1158.88	81
17.85	4055.17	131
17.8517	664.625	68
17.8567	11163	79
17.8583	2906.12	149
17.865	994.583	67
17.8658	3756.21	133
17.8733	40590.7	147
17.9683	1261.54	169
17.9708	478.333	204
17.9825	7157.29	248
17.9833	2187.96	249
17.985	2449.25	304
17.9858	8620.58	175
17.9867	45693.9	174
17.9883	394.375	143
18.0158	44.3333	264
18.025	780.042	299
18.0325	149098	61
18.0358	6523.33	83
18.0367	1604.67	169
18.155	880.875	124
18.1592	8146.92	123
18.1708	227.917	265
18.1733	664.75	286
18.18	317.208	181
18.2717	4004.71	172
18.2725	22163.1	114
18.2733	180183	232
18.2742	19298.2	334
18.275	406826	70
18.2767	18344	163
18.29	63203	116
18.2942	2694.12	154
18.2958	18696.3	153
18.3083	2208.75	257
18.3633	607.667	78
18.3958	1036.12	62
18.4167	828.208	63
18.4417	312.167	78
18.5567	74.9167	357
18.5575	161.833	238
18.5633	2805.54	193
18.6183	16.4583	358
18.7458	113.833	161
18.7783	1145.54	331
18.78	406.875	173
18.8242	-23	229
18.8292	190.167	207
18.8558	10446.2	100
18.8767	477.958	171
18.8925	881.708	256
18.9325	226.125	167
18.9958	70.1667	303
19.0308	2691.67	128
19.0675	273.333	248
19.0692	1010.29	167
19.0725	403.292	194
19.145	1704.17	76
19.1708	199	126
19.1717	734.458	177
19.1733	131.75	301
19.245	40.5833	168
19.3908	820.75	203
19.4608	1630	67
19.4825	1238.58	171
19.53	292	287
19.5467	343.292	173
19.565	1345.17	103
19.5692	2817.21	115
19.5817	5950.83	74
19.5917	3613.08	66
19.5992	2526.88	149
19.6058	3221.75	148
19.6417	426.125	269
19.6908	475.333	112
19.71	394.667	191
19.8108	3329.04	83
19.815	6907.12	71
19.845	1355	128
19.8542	-952.667	69
19.89	80.2083	238
19.9125	28	122
19.9308	2819.17	170
19.9367	-164.917	62
19.94	91.25	152
19.98	78.5	327
19.9883	12281.4	69
20.0175	213.333	289
20.0183	629.792	288
20.0375	181.333	140
20.1017	71.2083	180
20.1567	-4935.21	117
20.2125	-795.5	173
20.2533	68.4167	69
20.3067	-198	114
20.4192	10275	70
20.4825	5007.67	71
20.4842	2104.67	67
20.4867	597.667	159
20.4892	3934.33	85
20.4908	8159.79	82
20.4917	3603.92	97
20.4933	4422.79	81
20.4942	9688.75	174
20.4958	43163.8	96
20.4967	612	316
20.4975	2704.88	80
20.4992	179.167	317
20.5	322.667	112
20.505	2279.92	111
20.5075	2678.92	79
20.5083	1937.92	83
20.5167	2702.88	66
20.5267	22780.2	84
20.5333	781.75	218
20.5583	329.792	134
20.6125	177.333	266
20.6183	16132.1	156
20.6258	76.4583	180
20.6425	8630.29	174
20.6517	5622.42	74
20.6992	949.333	240
20.7342	669.5	154
20.8417	3415.29	246
20.8817	1460.08	219
20.9008	2959.42	113
20.9025	756.458	124
20.9133	9599.04	130
20.9183	843.583	161
20.9933	-8290.21	188
21.0133	1882.25	112
21.0167	117.667	182
21.0267	2266.58	241
21.0592	12879.2	133
21.0617	7024.71	149
21.0717	5181	103
21.085	8441.42	144
21.0858	1211.17	190
21.0958	2832.38	218
21.1008	1514	105
21.1075	9290.88	131
21.11	10019.2	148
21.115	60.375	365
21.1333	63.875	196
21.1908	-1611.83	152
21.2042	-11548	157
21.2567	2065.58	65
21.2683	1078.29	93
21.285	299416	74
21.2858	932147	75
21.2892	-10009.8	97
21.3367	5271.38	361
21.3375	18302.3	81
21.3392	8710	243
21.35	9995.67	97
21.36	-3969.88	63
21.435	813.75	143
21.445	4351.42	328
21.4575	1762.88	115
21.4667	2292.17	132
21.5383	-1420.21	98
21.5467	1407.83	148
21.6108	-112.875	316
21.6283	125.583	214
21.6308	330.417	113
21.6408	71.5	317
21.6617	6078.58	139
21.6692	25554.7	75
21.67	-1377.5	183
21.7158	-427.667	109
21.7267	-1001.12	98
21.7675	41.9583	257
21.7767	706.875	192
21.8458	3719.67	271
21.8483	57374.3	129
21.8492	47008.4	101
21.8525	6825.96	102
21.8625	836.667	326
21.9492	-161.292	124
21.9558	88.8333	359
21.9642	925.542	76
21.9667	404.958	153
21.995	99.25	199
22.01	365.542	191
22.0183	3345.92	116
22.025	47795.7	73
22.0275	39.5	184
22.0483	69.8333	238
22.2383	-4761.17	90
22.2458	-1843.88	96
22.2792	-3473.88	106
22.2975	37166.2	87
22.3067	2.45768e+06	73
22.3117	33812.7	85
22.3267	43681.2	70
22.33	65906.2	64
22.3467	18950.2	99
22.3625	359036	74
22.3675	16773.7	79
22.385	3498.5	244
22.3867	18198.3	245
22.5	253.5	159
22.5033	1812.38	128
22.5325	3089.83	113
22.5833	298.5	154
22.5958	601.125	152
22.6025	316	200
22.6442	561.625	122
22.6675	102.25	193
22.6817	3569.67	117
22.6875	473.292	152
22.6967	2763.25	76
22.7058	1652.38	146
22.7083	-3215.96	139
22.815	721.042	170
22.8175	6100.67	327
22.8567	1087.46	128
22.8658	1254.83	87
22.8775	26638.2	75
22.8825	1819.29	128
22.9525	1011.17	116
22.9558	2978.12	148
22.9625	1745.04	60
22.9917	2512.33	188
22.9925	377.5	272
22.9992	79.5	144
23.1083	-11575.4	64
23.1367	598.667	89
23.1433	326.875	99
23.1458	337.333	98
23.1467	1516.62	328
23.1583	151.167	260
23.1717	486.292	175
23.1808	3615.96	148
23.2533	21663.1	73
23.2742	112	435
23.2833	3033.58	129
23.2842	1880.17	77
23.29	5872.83	78
23.2908	12267.2	106
23.2942	205.167	146
23.2983	175.042	159
23.3	319.25	136
23.3008	372.958	180
23.3025	118.708	179
23.3142	136.125	194
23.3167	37.1667	436
23.3225	115.167	274
23.3242	107.958	284
23.3492	456.375	148
23.3583	906.917	327
23.3942	62.5	80
23.4117	33	274
23.4692	722.208	160
23.4975	384.917	192
23.5083	3503.42	191
23.5325	454	90
23.56	176.833	90
23.6483	21.6667	215
23.7058	172.208	141
23.7625	49.3333	244
23.8667	95	65
23.875	155.125	72
23.8983	175	179
23.9	211.083	65
23.9142	486.583	207
23.915	450.917	96
23.9158	113.667	157
23.9175	476.542	134
23.9183	930.917	97
23.9225	420.333	150
23.9242	1229.17	72
23.9258	263.208	113
23.9267	434.542	169
23.93	446	110
23.9308	303.25	93
23.9317	79.9167	258
23.935	747.042	140
23.9383	962.875	68
23.94	81.75	166
23.9408	602.333	71
23.9433	53.8333	186
23.9475	1163.46	206
23.9525	48.1667	152
23.9583	111.333	63
23.9592	99.4583	240
23.9608	170.5	102
23.97	52.5417	308
23.9758	346.25	69
23.9842	214.458	84
24.0317	94.125	63
24.0717	408.5	66
24.0733	791.125	99
24.0742	74.875	161
24.0867	266.208	95
24.095	304.667	117
24.0958	430.708	148
24.1	1962.29	70
24.1192	615.208	72
24.1375	247.583	181
24.1392	2625.92	180
24.145	46.1667	285
24.1858	429.125	199
24.1867	1230.08	78
24.2042	60.6667	173
24.2117	1098.83	84
24.2183	269.875	199
24.3325	168	118
24.3358	1128.21	294
24.34	338.333	192
24.345	778.833	84
24.3508	153.792	296
24.3517	97.625	124
24.36	1580.88	72
24.3667	504.875	99
24.3675	426.208	200
24.375	57.0833	183
24.4125	62.7917	294
24.4208	653.833	104
24.4242	2692.5	76
24.425	3589.92	103
24.4258	2439.67	79
24.4267	1310.5	78
24.4275	5454.5	70
24.43	33021.2	75
24.4308	23948.5	108
24.4317	121280	73
24.4325	1992.83	96
24.4333	3714.08	146
24.4358	838.458	211
24.4367	225.458	284
24.4375	595.5	184
24.4558	1844.46	186
24.46	255.75	207
24.4825	5233.21	70
24.5008	142.417	65
24.5167	79.9583	109
24.5333	45.9583	208
24.5742	473.625	141
24.5825	39.1667	230
24.5867	429.5	149
24.5917	905.25	257
24.5933	1743.96	98
24.62	287.042	184
24.6242	29.9167	62
24.6275	289.042	83
24.63	647.583	230
24.6308	2246.96	202
24.6325	1404.25	215
24.6367	2776.88	68
24.64	1797.42	216
24.6433	892.333	110
24.6442	2738.92	131
24.6467	1115.12	140
24.65	802.667	82
24.6508	410.208	218
24.6567	1420.46	116
24.6575	573.583	154
24.66	479.083	304
24.6608	547.75	96
24.675	1306.08	87
24.6767	759.583	76
24.685	1398.83	85
24.6867	171.833	281
24.6925	81.0417	287
24.705	233.042	260
24.7567	163.042	219
24.7725	61	390
24.7783	181.583	230
24.7933	65.2917	374
24.8283	60.6667	270
24.8325	32870.2	259
24.8333	5870.42	241
24.835	12768.9	215
24.8433	1374.46	167
24.8708	11816.8	245
24.8717	129317	126
24.8967	21231.6	82
24.9583	102.333	188
24.9825	441.708	93
24.9958	103.917	179
24.9983	919	78
25.0117	193.792	208
25.0242	1990.92	103
25.035	388.542	67
25.0425	153.417	205
25.0458	1215.58	131
25.0483	615.75	207
25.0667	274.667	82
25.0675	165.083	155
25.0717	1856.79	77
25.0725	282	252
25.0733	660.583	224
25.1167	381.958	206
25.12	250.833	207
25.1367	205.5	65
25.1425	1408	131
25.1433	2683.83	103
25.1442	744.792	101
25.145	385.167	140
25.1458	59509.2	73
25.1492	4195.88	72
25.15	11502.9	70
25.1517	19956.2	244
25.1525	801.167	88
25.1542	489.417	169
25.1558	406.375	189
25.16	621.75	159
25.1608	1955.33	245
25.1617	1201.5	144
25.1625	396.417	125
25.1633	930.375	142
25.1658	645.167	114
25.1683	706.167	172
25.1692	177.167	104
25.1708	7488.04	74
25.1733	1265.46	60
25.1892	136.417	138
25.19	1322	99
25.1983	1963.12	98
25.1992	42.5	137
25.2008	1334.17	69
25.2017	1691.5	85
25.2058	568.25	304
25.2075	20953.8	126
25.2158	228.583	134
25.2183	11035.1	75
25.225	882.375	99
25.2333	50.4583	287
25.2342	579.792	220
25.2408	232.167	178
25.2442	185.208	310
25.245	251.708	166
25.2458	404.292	266
25.25	55	260
25.28	183.542	144
25.2833	308.875	129
25.285	270.5	318
25.2858	1544.5	156
25.31	370.917	266
25.3142	1649.21	74
25.3175	1854.42	226
25.3375	74.8333	245
25.3533	830.5	72
25.395	904.125	84
25.4083	1432.33	265
25.4433	301.875	345
25.46	84.375	520
25.4667	110.208	519
25.4967	1648.92	221
25.5058	-223	79
25.5342	882.042	265
25.58	62.75	114
25.6992	35.9583	254
25.7008	1483.5	61
25.8117	99.3333	109
25.8458	51.5833	370
25.8583	128.375	61
25.965	178.375	265
25.9675	501.792	113
25.97	796.833	99
25.9758	44.9583	178
25.9783	1095.33	149
25.9858	1379.29	148
25.9892	5489.54	106
25.9942	339.375	136
25.9958	3923.12	218
25.9992	165.958	315
26.005	132.167	144
26.01	74.5	137
26.0375	318.583	134
26.0683	276.5	67
26.2033	-43	355
26.4017	1560.71	61
26.415	231.833	90
26.4175	1206.88	93
26.43	423.708	121
26.4475	251.708	137
26.4775	220.083	345
26.5358	356.458	110
26.5425	4817.25	71
26.5458	299	95
26.5525	1847.83	84
26.555	604.417	78
26.56	41.1667	297
26.5642	43.5	266
26.5675	35.6667	251
26.62	1478.33	179
26.6625	795.167	61
26.7733	546.542	199
26.7792	61.875	432
26.8283	137.958	199
26.9067	68.125	465
26.9542	17.8333	566
27.1283	170.75	345
27.1292	284.25	183
27.1567	334.167	281
27.2233	31.2917	326
27.2517	148.833	79
27.3158	5194.92	73
27.3308	207.208	76
27.3475	203.208	65
27.3508	259.375	232
27.3533	422.958	262
27.3583	49.7917	323
27.3617	59.1667	109
27.3625	316.75	106
27.3633	199.167	103
27.3667	2943.04	93
27.3683	63.5	122
27.3692	116.708	130
27.37	350.958	94
27.3767	291.583	344
27.3833	181.875	136
27.3842	77.9583	188
27.3908	394.167	84
27.3917	20	320
27.3975	1228.17	78
27.4008	236.708	214
27.4175	241.167	82
27.435	79.5	92
27.4358	43.8333	167
27.4467	75.875	64
27.4867	201.583	345
27.4875	642	344
27.4892	42.7917	146
27.4942	696.708	174
27.495	581.292	94
27.4975	947.792	74
27.4992	5103.88	93
27.5008	610.125	72
27.5033	93.2917	135
27.5058	131	77
27.5083	195.417	255
27.5192	209.375	81
27.52	93.3333	109
27.5275	25.1667	240
27.5358	135.167	102
27.5408	1097.83	78
27.5967	652.625	93
27.65	68.0833	94
27.7067	119.458	205
27.7267	178.542	267
27.735	79.1667	62
27.7567	99.375	160
27.7592	309.167	115
27.7775	395.375	98
27.785	348.208	100
27.7967	-161.875	115
27.9267	69.9583	355
27.9325	85	105
27.9408	199.542	131
27.955	26.5417	356
27.9675	-61.75	204
28.025	132.583	103
28.04	244.292	131
28.0442	47.7917	106
28.07	241.958	149
28.1533	45.5	119
28.2242	-73.625	145
28.2583	-89.125	232
28.3992	152.333	100
28.4058	18.125	128
28.4333	12.3333	115
28.4733	48.1667	174
28.6408	387.833	205
28.66	288.667	126
28.6725	180.542	244
28.6925	301.875	103
28.805	719.125	129
28.8983	66.5	78
28.9025	49.1667	100
28.9342	35.6667	195
29.0075	24.375	334
29.0358	50.7083	326
29.08	40.5417	403
29.0817	21.3333	280
29.1258	-86.75	144
29.3133	171.458	84
29.345	64.2083	186
29.3842	206.333	132
29.435	57.125	67
29.5225	54.5833	135
29.5517	124.833	77
29.6842	63.6667	273
29.7675	56.4583	205
29.78	110	67
29.8225	349	78
29.8233	58.9167	410
29.8267	522.292	394
29.8842	33858.2	73
29.9683	512.208	100
30.1733	24.7083	135
30.1742	1164.67	221
30.1908	144.208	69
30.3108	113.625	101
30.3275	93.5833	66
30.3483	49	81
30.3492	18	221
30.36	54.3333	64
30.6192	184.667	75
30.7142	67.75	300
30.76	193.542	66
30.8492	53.5	217
30.8658	-558.708	75
30.9292	828.708	74
31.0375	147.583	101
31.1242	1069.92	281
31.1258	180.833	208
31.1367	512.042	246
31.1867	48.25	202
31.1942	145.542	260
31.2167	231.125	103
31.2192	100.375	114
31.2217	75.6667	261
31.2267	139.833	63
31.2308	83.25	358
31.245	276.25	290
31.2483	98.125	260
31.2617	99.0417	191
31.2733	50.8333	217
31.3067	55.0833	157
31.3767	53.1667	133
31.4608	3.83333	207
31.5933	152.458	221
31.6117	94.4167	209
31.66	-152	71
31.6675	-153.792	116
31.7383	465.292	74
31.7417	49.5	62
31.8117	38.6667	113
31.8958	84.6667	149
31.9358	55.125	133
31.9383	23.5	193
31.9617	55.6667	64
31.98	25.3333	99
32.0058	81.2917	76
32.0992	29.8333	193
32.2108	383.292	75
32.2342	46.75	205
32.2392	313.583	281
32.2425	51.2083	370
32.3025	338.292	148
32.3117	137.833	207
32.3192	2281.75	147
32.33	32.2917	362
32.5592	83.7917	135
32.6342	77.6667	87
32.69	30.3333	221
32.7308	-31.375	92
32.7667	65.3333	76
32.8208	18.3333	221
32.8758	15.6667	209
32.9783	51.9167	189
32.9967	50.625	358
33.0625	58.7917	422
33.0733	171.25	357
33.0858	34.6667	60
33.1175	78.9167	78
33.1192	35.75	385
33.1467	195.625	503
33.1908	26.5	142
33.1917	-84.5417	77
33.1967	25.7917	87
33.2083	-26.75	153
33.2467	44.5	87
33.3	95.9167	60
33.3217	125.542	133
33.5208	28.2083	135
33.5317	19.6667	165
33.5325	670.5	148
33.5367	134	67
33.59	1155.25	73
33.6083	918.333	147
33.6308	51.0417	87
33.6725	84.625	67
33.7225	69.5	76
33.7667	32.5	84
33.83	-99.5	77
34.0042	21.3333	69
34.0058	75.5	77
34.0125	21.1667	63
34.1183	48.625	60
34.125	35.375	283
34.2125	214.833	66
34.2725	35.7917	191
34.4475	68.5	70
34.5267	22.8333	267
34.5308	14.3333	208
34.56	28.25	193
34.6225	34.8333	60
34.7292	-71.25	64
34.8108	170.5	283
34.8242	60.7917	204
34.8383	58.3333	60
34.84	52.8333	279
34.8558	2023.12	147
34.8625	242.292	74
34.8642	332.042	66
34.8725	229.833	341
34.8742	2226.58	73
34.8758	253.375	103
34.9283	52.9167	143
34.9817	54.6667	76
35.105	338.167	207
35.1058	133.833	129
35.1133	119	119
35.1433	-55.875	129
35.4125	62.5	64
35.5242	46.6667	207
35.5425	53.3333	89
35.6458	41.1667	104
35.6758	169.333	167
35.7175	101	76
35.7267	407.333	73
35.7733	33.5	135
35.785	69.6667	101
35.7908	11.6667	209
35.9025	63.3333	105
35.905	234.125	66
35.91	68.25	101
35.9133	70.6667	77
36.0708	66.8333	64
36.0925	145.5	295
36.1633	71.1667	208
36.2733	565.042	103
36.4533	13	84
36.555	250.917	149
36.57	57.125	119
36.5808	714.125	281
36.5833	3003.12	147
36.585	41.3333	165
36.59	141	208
36.5917	42.8333	89
36.5925	13558.6	73
36.6158	1190.04	221
36.6458	102.167	327
36.6683	80.3333	76
36.7117	57.25	217
36.7608	-17.875	232
36.8308	153.417	149
36.8958	96	148
36.8967	1226.38	147
36.9092	40.1667	217
36.9292	18	208
37.1808	102	149
37.2908	46.7083	78
37.3658	117.625	61
37.3708	52.5417	111
37.3775	46.3333	78
37.4825	3309	73
37.4933	141.625	69
37.6058	60.6667	100
37.6333	114.75	105
37.6725	58.8333	104
37.6783	26.6667	167
37.7025	71.8333	105
37.82	77.75	76
37.845	34.5	78
38.1083	53.8333	78
38.1492	296.208	117
38.2083	3385.79	147
38.4175	82.9583	77
38.4408	336.25	66
38.6125	488.792	66
38.64	1714.08	117
38.6492	704	89
38.6525	1510.04	74
38.8767	58.625	76
38.9517	19.6667	195
39.03	-8	469
39.0542	34.5	135
39.0892	21.3333	137
39.1917	93.1667	77
39.2958	-18.125	341
39.3375	27.5	87
39.3717	40.6667	69
39.4225	34.5	208
39.5892	-35.125	149
39.6417	206.167	221
39.645	66.7083	130
39.6592	43.1667	68
39.7158	84.1667	61
39.7258	544.167	75
39.915	51.3333	76
40.0658	35.125	96
40.1292	88.0417	207
40.23	61.9167	221
40.29	-204.417	149
40.3	38.8333	70
40.3675	73.625	87
40.3817	51.1667	133
40.3933	28.5833	137
40.4058	-68.625	79
40.4267	-55.75	133
40.46	36.5	208
40.4783	-64	67
40.5542	127.417	77
40.555	60.7083	72
40.6142	56.1667	135
40.7917	46.5	87
40.8483	31	165
40.9217	-63.875	265
40.9617	226.583	73
40.98	65	79
41.2667	32.3333	295
41.3058	82	76
41.3733	23.9583	93
41.375	-30.125	129
41.4067	49.2917	78
41.5392	-21.625	152
41.5917	61.5	133
41.6933	46.5	61
41.6983	21	87
41.7692	44.7917	76
41.77	-57.5833	281
41.8683	23.5	165
41.885	34.3333	281
41.9417	637	73
41.9808	64.1667	74
41.9825	689.792	147
42.005	58.8333	60
42.0967	128.542	66
42.1925	-25.5	118
42.2067	39.8333	96
42.2442	36	135
42.2542	47.625	60
42.3058	73	100
42.3875	19.3333	91
42.5175	152.75	77
42.9258	69.3333	100
43.1208	-92.375	133
43.175	-1088.54	147
43.18	38.25	82
43.4092	57	60
43.4983	66.875	72
43.55	-38	153
43.6083	86.1667	66
43.9283	-71.0833	81
43.9917	29.5	267
44.0667	67.5833	78
44.1975	27.8333	165
44.3325	63.9167	135
44.3558	31.4167	76
44.3783	56.6667	208
44.4517	49.1667	193
44.4617	453.75	147
44.615	72	76
44.7175	81	78
44.8233	67.1667	208

## Sheet: Mix D1
All Metabolites				Increased Metabolites					Decreased Metabolites
RT (min)	Mass	MIX - CTL		RT (min)	Mass	MIX - CTL	Metabolites		RT (min)	Mass	MIX - CTL	Metabolites
8.1525	173	-740.429		8.31917	129	8312.36			8.20083	155	-7757.09
8.16417	155	4788.54		8.61083	89	11646			8.49417	207	-5194.01
8.19917	146	164.314		8.6925	70	32608.4			8.59667	75	-8157.09
8.20083	155	-7757.09		8.69417	77	387698			8.7425	117	-55715.1
8.21583	171	-377.829		8.695	73	1.27505e+06			8.77667	113	-5525.47
8.2425	130	1203.67		8.71333	117	54146			10.2067	154	-12395.6
8.24833	110	867.829		8.7225	104	16577.9			10.3492	93	-6931.13
8.28167	72	-1574.26		8.725	175	55371.6	carbamate, 3 TMS		11.5508	149	-65208.7
8.31917	129	8312.36		8.72583	174	332031			11.5517	147	-592256	sulafte
8.32583	98	122.771		8.79833	74	14481.7			11.5525	72	-35008.6
8.40583	116	818.986		8.80083	73	164884	silane		14.0358	313	-12912.4	glycerol
8.45167	113	-408.843		8.80333	207	135279			14.0367	315	-32359.3
8.46417	130	-1776.4		8.86	72	8289.33			14.7517	180	-7789.93
8.4925	208	-879.029		9.21167	147	22127.2	trisiloxane		14.7542	78	-8340.67
8.49417	207	-5194.01		9.85833	75	10558.9	acetic acid		18.13	89	-5282.04	L-aspartic acid
8.495	191	-576.143		9.87167	148	5402.17	propanoic acid		18.6625	100	-17105.2
8.49583	299	-414.271		9.9	66	7430.27			18.7042	64	-10194.1
8.49667	193	-280.3		9.94	148	6466.83			19.2625	128	-21313.2
8.56167	185	195.643		9.94417	66	10166.1			19.87	100	-8075.71
8.59667	75	-8157.09		9.96333	74	6833.59			20.435	156	-14076.8
8.60583	143	-468		10.1133	66	5717.29	L-alanine		20.6408	75	-9327.49
8.61083	89	11646		10.4708	73	28793.9	1-buten-3-yne		21.745	130	-5708.74	citrulline
8.6875	187	189.071		10.5467	72	20862.7	glycine		22.2642	204	-8561.34
8.6925	70	32608.4		11.37	73	20412.7	ethanedioic acid		22.2767	190	-19550.5
8.69417	77	387698		11.4808	73	34368.2	sulfate		22.2958	118	-6668.9
8.695	73	1.27505e+06		12.7283	74	50663.3	L-valine		22.31	329	-25388.4
8.69667	242	130.814		13.1083	73	10802.4	propanoica cid, 2 TMS		22.3375	106	-7490.63
8.71333	117	54146		13.8542	86	25732.6	silamine		22.8042	147	-20609
8.7225	104	16577.9		13.855	174	47629.2	silanol		22.8217	73	-99434.7
8.725	175	55371.6		14.1283	131	39677.2	glycine, 3 TMS		22.9217	73	-80980.2
8.72583	174	332031		14.9133	79	7241.24			22.9967	73	-60677
8.7375	129	-3442.76		14.9375	78	6287.43			23	147	-12270.6
8.7425	117	-55715.1		14.9458	151	5523.79			23.0108	79	-5431.83
8.75417	242	-76.9714		14.9492	83	8894.97			23.0383	100	-6269.51
8.77667	113	-5525.47		14.95	150	21690.3			23.0483	73	-50836.4
8.78583	105	2618.51		14.9508	148	320397			23.0558	133	-6158.06
8.79833	74	14481.7		14.9517	73	1.65844e+06			23.1075	73	-62270.9	d-galactose
8.8	60	1873.46		14.9525	66	56371.1	butanedioic acid, 2 TMS		23.1942	73	-42765.7
8.80083	73	164884		14.9533	133	91692.2			23.225	75	-12524.4
8.80167	134	2237.34		14.9542	101	28713.1			23.2942	73	-27397.6
8.8025	88	1604.77		14.955	117	50725.8			23.4083	73	-22228
8.80333	207	135279		14.9558	135	8925.89			24.0225	73	-23767.3
8.80417	161	1445.57		14.965	175	8821.96			26.1725	67	-7629
8.83083	61	3031		16.945	73	23972.3	Butanoic acid, 1TMS		26.175	71	-7426.54
8.86	72	8289.33		16.9683	147	13094.2			26.2217	69	-6221.7	d-mannose
8.91167	145	189.5		17.0792	174	9107.67			26.2458	66	-9001.87
8.92	140	-153.314		17.0833	89	8515.76			26.2467	84	-10728.6
9.00083	129	-1998.84		17.0942	75	18091.7			26.2483	70	-7008.3
9.03583	76	-1259.87		20.33	75	11772.6			26.25	60	-7586.83
9.19083	155	386.1		20.5542	73	37255.1			26.2508	76	-8015.4
9.21167	147	22127.2		21.2617	115	19275.8	glutamic acid		26.275	61	-14848.1
9.28833	153	-145.057		21.4575	75	17637.7			27.1725	75	-7606.77
9.28917	155	576.857		22.235	105	10025.4			38.535	73	-94679.5	octadecanoic acid
9.305	84	-758.286		22.24	133	269770	taurine		38.5358	74	-8469.79
9.31	112	-134.086		22.2442	61	54799.5			15.795	211	-1922.11	serine
9.31417	205	119.929		26.0467	75	6779.21			14.205	177	-1670.16	L-isoleucine
9.33917	72	3296.11		26.1892	74	284431			14.205	177	-1670.16	proline
9.34167	131	2811.29		26.19	73	2.93819e+06	d-glucose
9.35333	241	45.6		26.1908	66	17921.8
9.36083	64	-440.329		29.4833	73	5596.71	myo-inositol
9.45417	91	174.486		38.4275	69	6239.36
9.56333	189	200.5		38.5075	73	44118.6
9.56917	130	26.1429		38.5083	75	13285.6
9.57083	81	-106.743		24.9342	115	1402.14	1,2,3-triicarboxylic acid
9.58083	211	38.0571		21.2617	115	19275.8	ornithine
9.64917	127	72.1571
9.69333	122	-346.986
9.80333	77	3685.17
9.82333	64	-2252.93
9.85833	75	10558.9
9.87167	148	5402.17
9.9	66	7430.27
9.93417	191	193.957
9.94	148	6466.83
9.94417	66	10166.1
9.95	159	-29.8714
9.95833	223	420.814
9.96083	194	44.4143
9.96333	74	6833.59
9.9675	88	445.057
9.96917	259	59.8857
10.0017	249	42.0571
10.0025	62	112.286
10.0083	61	2229.31
10.0208	206	47.8
10.0242	64	1980.86
10.035	101	927.414
10.0542	188	55.1857
10.0625	74	3734.54
10.0908	64	-1453.9
10.1133	66	5717.29
10.14	188	94.3714
10.1408	63	-527.843
10.1742	85	1554.26
10.19	234	46.3
10.2067	154	-12395.6
10.2883	329	19.5286
10.3492	93	-6931.13
10.3942	161	-607.457
10.4358	95	410.571
10.4475	115	1059.51
10.4558	128	284.514
10.4667	69	-3782.9
10.4708	73	28793.9
10.48	100	3942.71
10.5208	74	3382.19
10.5467	72	20862.7
10.555	84	1796.46
10.5833	149	3898.24
10.7083	170	334.086
10.7658	95	-199.8
10.8517	182	71.7143
10.8525	158	120.714
10.9267	64	-463.571
10.9575	281	-37.6
10.9642	77	1315.43
11.1417	360	21.1857
11.1917	303	9.85714
11.2175	109	-77.2
11.2333	80	-523.129
11.295	63	440.986
11.3	90	345.886
11.3058	287	138.143
11.3067	78	2510.03
11.3083	154	206.086
11.3183	86	915.486
11.3192	99	150.4
11.3308	89	4789.17
11.34	105	960.571
11.3425	169	31.5857
11.345	122	216.371
11.3483	284	24.5143
11.3583	133	951.814
11.3667	92	186.729
11.37	73	20412.7
11.3758	151	154.629
11.3975	128	21.7143
11.3992	119	45.2429
11.4008	94	6.68571
11.4183	102	178.871
11.4192	207	390.071
11.4225	208	75.2857
11.4258	84	92
11.4367	177	31.8286
11.455	150	570.857
11.4567	130	510.6
11.4592	115	902.771
11.4733	93	561.786
11.4775	83	59.3429
11.4792	78	1761.56
11.4808	73	34368.2
11.5117	117	2972.46
11.525	112	32.0857
11.5425	264	29.0143
11.5492	151	-1212.61
11.5508	149	-65208.7
11.5517	147	-592256
11.5525	72	-35008.6
11.5708	213	-102.614
11.6033	76	808.857
11.6283	132	685.314
11.6325	107	299.057
11.6425	131	2354.43
11.6525	62	-538.714
11.665	92	-210.886
11.7442	210	112.4
11.7483	139	398.571
11.8058	111	50.3143
11.9292	102	-1639.61
11.9442	227	-3638
11.9858	61	-3924.36
12.0092	92	-238.029
12.03	112	193.086
12.0458	159	-831.829
12.0567	69	796.771
12.0633	121	420.5
12.085	103	-1857.17
12.0917	105	-654.4
12.1	146	-42.7
12.1192	143	-176.771
12.125	61	-2082.49
12.1342	61	-1466.9
12.15	91	-573.171
12.1567	80	-640.814
12.2067	169	-210.9
12.2733	172	110.429
12.2883	211	-1091.3
12.3575	135	-962.043
12.3633	163	-1435.73
12.3767	242	-716.8
12.3892	393	545
12.3992	107	-229.371
12.4125	82	818.686
12.4317	211	-2054.6
12.4608	98	-551.857
12.4908	211	-603.7
12.5183	83	-593.2
12.5242	239	15.1429
12.5583	261	54.8857
12.6483	207	170.871
12.7025	299	28.6
12.7092	211	-418.829
12.7167	193	56.7143
12.7192	95	490.2
12.7283	74	50663.3
12.74	242	-630.243
12.7417	264	21.5714
12.7433	178	96.7857
12.76	197	94.1143
12.7825	206	49.1857
12.7958	93	391.129
12.8133	221	372.657
12.8242	209	484.471
12.825	208	749.171
12.8608	167	-45.4714
12.875	207	-3202.84
12.8775	211	-1013.49
12.8833	208	-536.3
12.8883	209	-458.757
12.9083	84	-1017.17
12.9092	242	-226.5
12.9233	221	193.029
12.9675	84	701.657
12.9692	82	768.271
13	119	-499.7
13.0442	242	-233.7
13.0525	241	-1698.81
13.0708	333	48.0143
13.1067	65	63
13.1083	73	10802.4
13.11	241	-1116.29
13.1117	220	41.2857
13.125	148	1264.04
13.165	218	37.5714
13.2258	241	-867.9
13.3967	61	-414.771
13.445	196	60.2857
13.4792	156	19.4286
13.5108	112	250.086
13.5817	149	-662.729
13.5908	65	-318.1
13.595	64	-104.243
13.685	69	79.7143
13.8467	137	39.4143
13.8533	176	4204.5
13.8542	86	25732.6
13.855	174	47629.2
13.8558	130	3659.09
13.8567	102	2717.44
13.8617	161	57.4
13.865	71	1992.54
13.8658	149	1633.56
13.8683	148	3570.29
13.8875	281	141.914
13.9025	173	157.529
13.905	105	953.857
13.9067	232	362.7
13.9117	205	67.6286
13.9125	187	74.3857
13.915	320	168.086
13.9192	176	57.7143
13.94	223	65.4429
13.9675	230	15.3286
13.9758	405	-45.8714
13.9858	335	-942.8
13.9883	247	-437.557
14.0142	96	-3751.43
14.0267	587	-9.9
14.0358	313	-12912.4
14.0367	315	-32359.3
14.0467	157	-777.014
14.0475	341	7.82857
14.1125	78	1762.9
14.12	311	-37.8
14.1283	131	39677.2
14.15	168	-406.1
14.165	68	-620.529
14.1683	95	-975.029
14.1708	318	-46.1
14.205	177	-1670.16
14.2283	152	-375.9
14.2308	221	-612.443
14.2417	269	-372.186
14.3025	91	-1389.91
14.3183	138	-387.686
14.3233	218	158.771
14.3367	117	2011.43
14.345	83	-275.814
14.3467	85	-748.429
14.36	72	-3339.16
14.3642	207	-4533.03
14.3683	172	118.157
14.435	106	-824.929
14.4542	91	-1271.56
14.4992	197	-139.7
14.5042	314	-3889.47
14.5175	95	529.086
14.5367	301	-3598.33
14.5442	315	-1113.2
14.5508	157	204.3
14.6217	245	57.9571
14.625	314	-3710.8
14.6358	363	-9.4
14.6467	211	-4471.5
14.7275	212	-521.7
14.74	137	-2167.4
14.7425	213	-244.043
14.7433	91	-881.2
14.7517	180	-7789.93
14.7542	78	-8340.67
14.755	181	-2710.63
14.76	183	-659.457
14.7942	387	28.2143
14.7992	69	1391.43
14.8125	120	-276.886
14.8167	138	-234.114
14.8375	230	45.5429
14.8708	101	146.714
14.895	86	702.143
14.9133	79	7241.24
14.9275	95	480.657
14.9333	252	57.3429
14.9375	78	6287.43
14.945	239	77.7857
14.9458	151	5523.79
14.9475	250	3765.89
14.9483	160	490.286
14.9492	83	8894.97
14.95	150	21690.3
14.9508	148	320397
14.9517	73	1.65844e+06
14.9525	66	56371.1
14.9533	133	91692.2
14.9542	101	28713.1
14.955	117	50725.8
14.9558	135	8925.89
14.9567	164	1940.69
14.9575	107	1250.39
14.9583	205	1458.39
14.9592	180	4088.34
14.9608	162	2042.77
14.965	175	8821.96
14.9775	139	164.586
14.9933	465	12.1429
15.0825	89	1119.03
15.0858	85	-733
15.1075	69	939.771
15.1317	79	4437.17
15.1408	105	692.986
15.1508	247	81.3143
15.1558	115	1232.06
15.2	79	3748.81
15.2725	159	68.5
15.3025	105	340.471
15.3058	135	567.8
15.3067	213	134.871
15.3308	117	-561.8
15.5142	151	-532.043
15.5167	148	275.371
15.5617	103	-1519
15.6292	218	-115.857
15.7392	208	179.629
15.7783	180	-489.9
15.795	211	-1922.11
15.8175	231	24.8571
15.8183	92	51
15.845	211	-1595.84
15.8825	88	-695.671
15.955	265	69.0857
15.99	103	-1050.21
16.0475	216	74.2714
16.135	114	-51.8714
16.155	104	-236.971
16.2808	105	51.7143
16.2983	247	243.8
16.3083	69	142.2
16.3358	131	302.929
16.3375	67	46.2429
16.3417	174	684.129
16.3458	259	37.9143
16.3483	292	-41.1714
16.3575	144	54.1429
16.3592	129	283.743
16.3783	139	202.186
16.3825	112	66.7
16.3925	102	297.514
16.4442	142	47.8857
16.475	256	91.2857
16.4775	124	141
16.4792	242	255.029
16.49	108	109.286
16.5083	155	138
16.5133	296	100.943
16.515	269	32.7714
16.5992	74	2330.26
16.6017	270	216.557
16.605	105	59
16.6092	91	242.871
16.6108	139	-127.943
16.6117	158	269.629
16.6217	115	132.429
16.6283	116	337.4
16.6292	68	2289.79
16.6317	174	4811.21
16.6375	90	178.571
16.6392	131	645.571
16.6408	276	252.871
16.6425	128	99.7286
16.6483	142	38.5143
16.6542	277	67.7714
16.6575	86	341.3
16.6717	129	437.329
16.6858	155	1417.86
16.6883	306	37
16.6892	156	84.8714
16.705	75	3587.86
16.7108	207	364.343
16.7475	69	698.143
16.8375	173	80.9857
16.8658	292	-55.3571
16.8833	102	1622.29
16.885	120	34.3429
16.8942	174	426.129
16.8992	115	499.971
16.9	71	362.329
16.9042	191	278.929
16.9167	60	883.129
16.945	73	23972.3
16.9683	147	13094.2
16.9692	148	1606.14
16.9758	111	57.9143
16.9908	161	170.886
16.9917	205	55.2857
16.9942	220	53.2857
17.0017	159	224.929
17.0358	253	-29.4
17.06	90	653.129
17.07	128	440.157
17.0717	156	208.086
17.0742	142	130.957
17.075	176	419.786
17.0767	137	-133.086
17.0792	174	9107.67
17.08	72	1690.87
17.0833	89	8515.76
17.0858	163	275.629
17.0942	75	18091.7
17.095	276	546.2
17.0967	68	4452.6
17.0983	86	1702.16
17.115	129	1369.77
17.1158	186	86.0571
17.1233	278	49.8571
17.1267	292	85.2571
17.1417	172	332.2
17.1642	211	-58.5571
17.1758	100	321.8
17.1833	129	759.657
17.1967	165	60.0429
17.2175	119	-74.9429
17.365	64	-956.957
17.405	211	-235.257
17.4417	189	72.7286
17.4425	181	-48.8429
17.455	149	-597.671
17.4783	262	-42.5143
17.4917	131	-767.286
17.5825	113	108.771
17.6158	177	254.429
17.7492	145	2176.29
17.8133	143	171.029
17.8825	121	-106.143
17.8967	208	-96.6571
17.93	158	-655.414
18.05	193	-494.643
18.0658	300	-584.771
18.13	89	-5282.04
18.1642	123	-2487.71
18.1683	79	-3196.5
18.18	66	366.714
18.2067	138	-190.443
18.2125	154	972.429
18.2292	92	-291.986
18.2358	81	-1233.47
18.2933	364	-22.7429
18.3508	79	-2240.76
18.3533	191	-357.457
18.3583	103	1720.06
18.4142	62	-622.4
18.4817	146	-447.829
18.5633	171	-92.3714
18.575	96	-126.443
18.6317	72	3396.43
18.6625	100	-17105.2
18.6917	300	-481.186
18.7042	64	-10194.1
18.7692	355	20.7571
18.81	218	470.6
18.8358	112	116.371
18.8833	76	-915.314
18.9308	133	2880.71
18.9667	243	-169.814
18.9925	186	-1427.64
19.0392	103	2026.13
19.0525	261	-19.1143
19.0983	135	448.1
19.1367	189	621
19.1425	252	-920.743
19.1458	118	748.686
19.2125	67	-386.886
19.2308	160	2875.71
19.2592	153	1266.01
19.2625	128	-21313.2
19.6	103	735.986
19.7492	74	-2463.9
19.7858	172	-867.071
19.8117	114	-119.643
19.8183	111	-3003.34
19.8458	233	-115.857
19.87	100	-8075.71
20.035	111	252.857
20.0475	202	369.357
20.0892	118	345.586
20.0983	292	1441.53
20.0992	205	1056.44
20.1192	150	85.9857
20.12	218	720.8
20.1492	99	162.457
20.1775	65	66.5429
20.2892	147	245.6
20.3217	101	474.971
20.33	75	11772.6
20.3325	90	128.9
20.3375	205	123.571
20.3792	172	258.286
20.435	156	-14076.8
20.4758	206	-17.8
20.5033	173	-672.7
20.545	119	173
20.5542	73	37255.1
20.56	66	428.271
20.5617	134	107.286
20.5658	61	1053.2
20.5667	215	25.8714
20.6408	75	-9327.49
20.6542	140	341.729
20.6875	68	735.6
20.7242	232	3083.06
20.7758	172	255
20.7933	147	3398.43
20.8225	70	2339.71
20.835	88	550.7
20.89	218	1033.06
20.9083	289	39.3714
20.91	160	-3662.77
20.9858	87	1609.86
21.0233	80	-799.2
21.05	307	77.8857
21.2617	115	19275.8
21.4025	122	-235.8
21.45	183	516
21.4575	75	17637.7
21.6142	83	-49.2
21.6608	135	93.0286
21.7233	147	581.657
21.735	60	280.571
21.745	130	-5708.74
21.7625	66	1117.74
21.8683	84	593.771
21.8725	292	87.3571
21.8775	190	246.657
21.9183	268	-654.3
21.9258	196	-403.3
21.9808	67	109.857
22.0383	159	385.8
22.0417	328	-34.0143
22.0542	117	725.471
22.0592	205	137.857
22.0675	346	39.5
22.0858	307	98.1
22.1725	320	2633.33
22.235	105	10025.4
22.24	133	269770
22.2417	121	2598.31
22.2442	61	54799.5
22.2458	91	2420.14
22.2642	204	-8561.34
22.2767	190	-19550.5
22.2833	67	4936.81
22.2958	118	-6668.9
22.3033	228	-3723.74
22.3092	469	15.5714
22.31	329	-25388.4
22.3258	154	-1966.61
22.3375	106	-7490.63
22.3825	191	-4082.11
22.4383	278	-69.0429
22.4425	69	-3101.27
22.4433	221	-542.6
22.45	181	-307.671
22.4525	63	-1333.31
22.4608	231	-411.557
22.4742	167	-258.9
22.5442	67	-2761.54
22.545	81	-830.029
22.5617	113	895.571
22.595	251	-64.6
22.6092	329	-806.786
22.6208	109	-301.5
22.6483	195	-131.8
22.6608	193	-133.3
22.665	191	-193.1
22.6825	80	-341.086
22.6858	170	-371.757
22.7133	239	-434.2
22.7225	189	-918.571
22.725	248	-791.243
22.7633	225	-2414.33
22.7642	239	188.143
22.77	149	-2822.06
22.7817	148	-4539.49
22.795	461	14.4286
22.8042	147	-20609
22.81	131	-4834.1
22.8133	113	-1013.4
22.815	238	-2183.2
22.8183	134	-1451.17
22.8217	73	-99434.7
22.8225	98	-873.757
22.8258	99	-612.343
22.83	127	-72.5714
22.8375	66	-4330.96
22.8458	102	-1242.49
22.8483	77	-3797.1
22.8717	329	-271.614
22.8908	148	-3060.8
22.8925	64	3636.14
22.9025	145	-353.157
22.9108	105	-860.843
22.9175	149	-2013.53
22.9217	73	-80980.2
22.9225	68	-502.457
22.9417	196	-556.6
22.9442	160	632.286
22.9525	137	-49.2
22.9567	238	-1345.94
22.9625	77	-3021.2
22.965	248	-225.157
22.9942	148	-2269.91
22.9967	73	-60677
23	147	-12270.6
23.0017	149	-1096.26
23.0075	60	-1694.49
23.0108	79	-5431.83
23.0267	84	-1638.36
23.0358	248	-238.7
23.0375	328	-805.5
23.0383	100	-6269.51
23.0483	73	-50836.4
23.0558	133	-6158.06
23.0575	132	-394.186
23.0667	175	-610.671
23.07	300	-38.0857
23.0725	96	-201.357
23.0733	243	-584
23.075	170	-534.414
23.0767	74	-4506.26
23.0792	77	-2093.37
23.0892	134	-582.029
23.0917	64	2986
23.105	143	-98.2714
23.1075	73	-62270.9
23.1092	101	-633.943
23.1392	113	-384.986
23.1675	188	-1516.01
23.1733	202	20.5571
23.1875	328	-777.7
23.1942	73	-42765.7
23.225	75	-12524.4
23.2283	238	-779.857
23.2483	119	-271.557
23.2942	73	-27397.6
23.3417	69	-163.614
23.405	100	-2290.54
23.4083	73	-22228
23.4958	188	-595.7
23.5208	160	-287.429
23.5233	130	-1070.27
23.5425	133	-1640.07
23.6475	299	-34.4
23.6817	207	-691.071
23.705	221	-57.1429
23.7625	95	98.4571
23.8233	100	-96.9
23.83	68	78.2571
23.9583	175	-83.9571
23.9775	84	135.371
24.005	110	-76.0714
24.0142	306	-56.1286
24.02	133	-970.171
24.0225	73	-23767.3
24.035	159	102.671
24.045	212	106.386
24.0633	67	119.614
24.0825	78	-373.586
24.1258	232	133.443
24.1283	221	-33.9
24.145	133	495.3
24.1633	245	44.3857
24.2442	128	-598.1
24.2575	355	41.6286
24.265	152	-43.8
24.3992	102	-763.3
24.425	70	-2531.17
24.4358	103	-2575.56
24.465	61	850.971
24.4725	76	813.8
24.4733	77	501.029
24.4908	66	397.214
24.5892	76	301.614
24.6858	154	-180.129
24.7283	184	-115.6
24.7467	248	-27.4714
24.7708	159	149.229
24.7883	148	195.586
24.8425	408	-83.8
24.9108	245	372.286
24.9167	82	624.286
24.9342	115	1402.14
25.0625	79	-47.6
25.0658	78	39.9286
25.1	218	27.9
25.1508	85	-426.129
25.1775	265	-774.8
25.2367	166	-41.4
25.2867	407	9.14286
25.295	228	18.2857
25.3425	72	-967.8
25.3567	61	-398.8
25.3942	117	2187.01
25.395	129	921.157
25.4775	299	-17.5429
25.51	160	27.1429
25.5217	74	453.886
25.535	86	33.4286
25.6342	217	383.057
25.6708	79	-62.2286
25.7492	67	275.757
25.7758	151	155.943
25.78	191	3336.07
25.7917	204	3282.74
25.8	141	112.5
25.8067	111	269.343
25.8083	127	191.671
25.825	223	100.3
25.8283	155	180.3
25.8442	306	198.071
26.0183	163	178.1
26.0467	75	6779.21
26.05	147	3243.23
26.0583	200	29.9
26.1058	145	-94.9857
26.145	272	15.4571
26.1725	67	-7629
26.175	71	-7426.54
26.1883	107	3240.99
26.1892	74	284431
26.19	73	2.93819e+06
26.1908	66	17921.8
26.2217	69	-6221.7
26.2458	66	-9001.87
26.2467	84	-10728.6
26.2483	70	-7008.3
26.25	60	-7586.83
26.2508	76	-8015.4
26.275	61	-14848.1
26.2867	174	-786.8
26.5308	108	-390.786
26.5942	106	-197.186
26.5958	492	-18.6
26.7117	177	-93.5
26.7867	72	-804.5
26.9375	465	-16.2
27.1483	87	-145.343
27.1658	198	-24.9
27.1725	75	-7606.77
27.1733	171	-95.6714
27.1742	102	-138.114
27.1767	117	-1084.8
27.1783	157	-355.243
27.1808	89	-1070.6
27.1817	271	-113.1
27.19	130	-455.843
27.2242	363	-61.0143
27.2975	100	-28.1
27.3342	77	-77.6429
27.39	135	27.7571
27.3992	77	-56.4
27.4317	96	12.1286
27.5225	76	-57.8
27.5825	100	-24.1714
27.6575	117	176.957
27.6583	129	39.8571
27.73	63	-24.6
27.75	76	-143.571
27.7642	149	194.786
27.7717	103	-1222.61
27.7967	103	561.829
27.8058	159	104.8
27.8558	102	81.4571
27.8725	68	29.8714
27.8942	135	26.2857
27.9008	85	-37.7429
27.9075	118	-22.4
28.0442	233	18.4286
28.0567	410	-22.4
28.0825	223	-20.9
28.1742	89	52.2571
28.1892	60	44.7
28.2325	146	24.2571
28.2817	79	-31.3
28.3242	117	802.857
28.3308	132	-162.529
28.3317	100	-493.1
28.3333	91	-102.186
28.3342	60	-171.586
28.335	70	-108.7
28.3425	90	-69.6571
28.3442	89	-872.243
28.345	102	-212.643
28.3517	220	-470.257
28.3658	117	-639.957
28.3783	157	-270.257
28.3825	229	-38.9
28.5567	63	25.5714
28.6842	301	-26.7714
28.6892	326	-51.6714
28.8008	75	2623.31
28.815	73	1499.83
28.85	145	86.1714
28.9308	207	34.5
28.955	104	17.6286
28.9708	496	4.71429
29.01	133	34.2143
29.0425	64	-42.2
29.07	74	-943.857
29.0925	61	34.8571
29.0942	149	288.314
29.1225	116	100.557
29.4258	100	-27.0286
29.4467	131	-210.229
29.4692	147	-1458.26
29.4817	205	367.571
29.4833	73	5596.71
29.4842	74	299.286
29.4992	135	-20.3429
29.5075	213	43.2857
29.51	103	371.343
29.5125	147	937.286
29.5133	217	155.714
29.5192	87	704.314
29.52	130	79.1714
29.525	117	267.771
29.5808	189	75.1143
29.6142	229	38
29.6192	66	137.714
29.86	105	59.9286
30.0183	64	-29
30.0792	87	56.0286
30.0867	89	53.8857
30.1483	79	-33.1571
30.1542	267	-32.7
30.1758	74	221.157
30.1792	63	-24.0429
30.2633	100	-26.4
30.2742	77	41
30.3367	299	-20.0714
30.5583	133	45.2
30.6967	103	-639.3
30.8867	103	31.3571
31.0375	73	1203.86
31.0617	103	-79.3429
31.1517	156	25.5714
31.1883	74	-204.086
31.2325	133	-231.5
31.2667	67	52.0714
31.2675	84	28.1429
31.3775	76	-29
31.4683	133	32.2857
31.5067	135	16.0857
31.6425	379	3.85714
31.6658	125	19.1429
31.6725	105	56.8857
31.6733	79	148.8
31.6775	99	58.9571
31.6792	121	32.8571
31.7025	146	53.0857
31.7217	71	68.8857
31.735	83	136.414
31.7908	147	531.1
31.7933	66	101.543
31.8025	83	105.543
31.815	148	50.4286
31.88	129	194.643
31.8983	75	-221.714
31.9642	73	504.843
31.98	64	-40.9
32.1617	129	20.1429
32.2183	267	54.2857
32.2233	369	67.5143
32.2258	133	84.6
32.3825	66	169.786
32.4258	76	-39.3286
32.5	61	-58.4286
32.565	73	655.6
32.5667	129	34.8429
32.5742	103	50.3
32.575	204	120.243
32.5892	207	47.5286
32.6325	149	75.0571
32.8392	135	16
32.9292	117	34.3286
32.94	77	55.2429
33.1692	69	16.7714
33.2033	135	21.0857
33.2542	79	27.4
33.2983	67	-31
33.3383	76	-39.1
33.3808	283	10.2857
33.425	91	-41.9
33.4292	135	19.5
33.435	207	43.1
33.4392	77	-100.757
33.4733	73	-448.4
33.4883	73	598.929
33.4933	147	1245.74
33.535	148	183.543
33.5883	149	30.8
33.6342	105	22.2857
33.6783	207	41.2571
33.7758	71	50.2857
33.825	129	47
33.8875	77	62.0286
33.9133	147	1162.31
33.9617	91	14.5714
33.9667	300	-16.2
34.1075	81	-26.6143
34.1142	149	84.2429
34.1192	223	63.2571
34.1242	208	69.5571
34.1292	295	162
34.1308	222	117.886
34.1325	147	940.729
34.1383	296	55.4857
34.1525	371	20.3571
34.16	99	-15.9
34.2408	150	14
34.3408	100	-17.9
34.3608	149	54.2429
34.3925	71	37.3143
34.4067	93	10.7143
34.6275	69	201.7
34.7158	112	18.3
34.7208	100	-20.1
34.7417	76	-27.2
34.9525	72	48.9286
34.9567	77	-63.6
35.0233	221	-25.5
35.1117	175	-38.4
35.1208	233	-28.6
35.1283	61	-94.3286
35.1392	135	-89.9857
35.1417	142	-35.0714
35.155	117	34.7286
35.1792	65	-38.9143
35.21	207	41.4429
35.2408	76	-32.9
35.2717	129	-79.3143
35.3875	103	-104.771
35.4708	207	-46.0286
35.5925	191	16.7143
35.6033	60	-23
35.6117	461	8.28571
35.6633	135	29.5
35.6767	150	34.0714
35.8158	129	-149.4
35.8217	175	-28.4143
35.8608	129	115.571
35.8992	209	-43.6857
35.9017	79	-27.4
35.9175	60	-20
35.92	296	49.4429
36.2542	83	-73.6286
36.2733	127	-4
36.2967	143	55.4286
36.4375	76	-47.5
36.4425	149	55.4143
36.5067	135	53.9
36.57	91	-14.4
36.6508	297	6.71429
36.7442	207	-49.2
36.8517	95	-17.5
36.8683	208	-11.9
36.9675	135	35.6143
37.1167	73	1610.24
37.1925	85	26.7143
37.2142	208	-17.8
37.2167	70	-34.7571
37.25	135	32.6571
37.38	147	1743.54
37.4183	267	-20.9714
37.6325	64	59.0714
37.7408	75	-263
37.825	86	-15.9
37.8617	207	72.2429
37.8642	66	108.043
37.8917	63	-27.1571
37.9167	77	87.9143
38.03	131	141.286
38.1075	131	-838.757
38.11	148	-577.986
38.1192	74	-896.529
38.1317	116	-237.3
38.1342	85	-386.343
38.1383	89	-717.129
38.1392	104	-223.4
38.1442	132	-124.986
38.3317	81	30.5143
38.3425	63	-53.4
38.36	100	-49.3429
38.3608	208	-42.4
38.4275	69	6239.36
38.4792	147	1207.16
38.48	60	804.214
38.5067	105	825.329
38.5075	73	44118.6
38.5083	75	13285.6
38.5092	61	1635.53
38.535	73	-94679.5
38.5358	74	-8469.79
38.5367	61	-3032.8
38.5408	267	-2377.19
38.5417	66	-1835.61
38.5458	207	-903.543
38.5525	161	-445.771
38.5675	402	-435.086
38.575	164	-128.414
38.5758	275	-160.986
38.5842	126	-167.886
38.6525	222	-23.4
38.6542	76	-167
38.68	131	226.314
38.6958	101	440.486
38.6975	103	354.571
38.73	73	2610.51
38.7625	147	2160.23
38.8792	131	70.9286
38.9217	148	96.7286
39.0292	71	33.3857
39.07	223	-19
39.125	148	153.786
39.135	267	-53.3714
39.1367	87	41.9
39.1475	66	144.643
39.1958	103	37.8429
39.2267	211	7.41429
39.2842	267	-18.1
39.2975	92	19.6714
39.3017	75	82.7143
39.3508	155	-52.3
39.3592	105	-43.8
39.3917	149	47.7857
39.3958	148	173.386
39.4225	133	-50.5
39.5525	88	-144.057
39.5567	60	-338.029
39.59	210	-62.1714
39.6342	280	-27.0857
39.6867	148	68.4286
39.7075	96	-40.7
39.7117	103	-28.7286
39.72	147	703.714
39.7308	70	21
39.9242	283	15.8143
39.9375	64	111.1
39.9442	96	-24.3
40.1925	64	-76.9286
40.2008	135	27.1571
40.2808	129	-60.9857
40.29	75	-225
40.2983	249	8.71429
40.345	207	67.8571
40.4417	128	9.42857
40.475	105	39.7286
40.4758	135	30.3429
40.5458	66	298.943
40.5567	83	-78.8571
40.57	149	86.8571
40.5892	103	-130.543
40.5908	66	193.657
40.6017	109	-26.1286
40.6417	135	62.5857
40.6458	64	118.429
40.695	147	526.986
40.7167	135	46.2286
40.755	71	-17.7
40.885	123	-13.5
40.8908	137	10.4286
40.9083	133	-361.8
40.9358	134	-60.3
40.9942	135	39.6143
41.0575	66	-60.6
41.1492	105	39.2857
41.1533	72	50.8571
41.1958	133	-52.3286
41.2592	148	204.614
41.2775	131	110.414
41.28	87	65.5714
41.2917	103	40.2143
41.2967	149	90.2286
41.3258	150	14.1429
41.3775	149	38.6857
41.5283	60	-27.2
41.5442	79	-31.7571
41.5617	181	10.1429
41.5708	204	-160.871
41.6667	64	131.957
41.71	250	14.4286
41.8425	74	25.4286
41.8483	77	68.8714
41.8833	66	120.171
41.895	79	-38.7
41.9	73	199.957
41.905	111	9.57143
41.915	537	10
41.9542	100	28.8
41.9558	61	42.1429
42.0192	63	-21.1
42.05	117	42.8571
42.0817	87	44.0286
42.0858	149	98.1571
42.2358	209	-72.3714
42.2825	66	351.929
42.3275	147	2033.06
42.3317	149	150.743
42.3325	87	83.4429
42.3733	135	71.2857
42.4675	105	35.1
42.5375	207	-86.9857
42.5592	148	116.514
42.5683	96	38.7429
42.57	209	30.9286
42.6067	207	132.843
42.7267	61	43.6286
42.7317	221	-75.6429
42.7475	64	219.029
42.79	74	-52.7
42.7925	73	-826.714
42.8158	209	28.3
42.83	207	74.3
42.8558	72	29.2857
42.9292	148	131.171
42.9325	133	24.0857
42.9358	117	37.9143
42.9433	103	24.8143
42.9542	75	-132.3
43.0333	147	310.786
43.0408	567	6.71429
43.0775	78	37.4857
43.1375	149	81
43.1733	267	43.2286
43.1942	73	-187.1
43.2117	114	12.1429
43.2267	132	32.5286
43.2992	129	11.7714
43.34	137	-26.9286
43.3608	73	568.4
43.3642	163	18.7
43.4117	61	33.7143
43.4375	116	8.85714
43.4667	221	-199.2
43.5308	137	-42.1
43.5375	384	9.42857
43.57	207	74.5857
43.5783	65	29.0429
43.6633	63	-35.9857
43.6708	147	880.671
43.7475	64	139.871
43.7675	115	42.1429
43.8208	135	29.8571
43.845	96	-51.6
43.8958	223	-28
43.9575	135	21.0143
44.1808	209	15.8571
44.2692	148	87.7857
44.3492	207	91.1
44.35	64	137.243
44.3533	96	38.1857
44.4042	149	51.0143
44.44	81	-36.5714
44.5092	64	169.386
44.515	313	4.85714
44.5242	147	460.571
44.53	148	120.486
44.5967	209	-40.2
44.63	137	-35.8286
44.6342	63	-37.4
44.685	135	24
44.7158	223	-16.7
44.7383	61	6.28571
44.7433	221	-44.0571
44.8717	78	41.7143
44.9442	75	156.786

## Sheet: Mix D5
All Metabolites				Increased Metabolites					Decreased Metabolites
RT (min)	Mass	MIX - CTL		RT (min)	Mass	MIX - CTL	Metabolites		RT (min)	Mass	MIX - CTL	Metabolites
8.025	126	-248.444		8.08583	79	17850.8			8.0425	103	-108582
8.03917	106	-988.156		8.16833	104	9493.58			8.04333	73	-516314
8.0425	103	-108582		8.17083	73	317368			9.1075	73	-101572
8.04333	73	-516314		8.20167	61	35656.6			9.77167	75	-41612.5
8.08583	79	17850.8		8.2075	146	8977.13			9.98083	75	-15624.2
8.14333	383	10		8.21833	100	7143.42			10.3708	66	-91888
8.1675	318	8		8.7375	113	48563.4	carbamate		12.0058	133	-15086.4
8.16833	104	9493.58		9.70333	77	5962.27			12.01	77	-14162.7
8.17083	73	317368		10.6508	66	21304.4	L-alanine		12.0142	147	-41071.6
8.19167	120	3669.84		10.73	76	8374.8	2-butenedioic acid		14.0175	75	-352553
8.20167	61	35656.6		10.7308	81	6125.6			14.0292	104	-31928.5	glycerol
8.20417	144	4417.8		11.0108	116	7891.2			14.0342	117	-67302.4
8.2075	146	8977.13		11.2292	130	9967.78	ethandioic acid		14.0833	73	-3.07118e+06
8.21833	100	7143.42		11.6708	148	13899	sulfate		14.455	300	-13641.5	silanol
8.28417	66	4714.18		14.6867	211	10572.7			18.2117	148	-80326.1
8.37417	411	6		14.8558	135	13628.1	glycine		18.2475	188	-113863
8.48667	207	-1018.62		14.9275	79	9735			18.4342	76	-6444.2
8.48833	179	87.5778		14.9825	135	5968.27	butanedioic acid		18.4375	71	-5744.76
8.49167	91	545.333		15.1583	299	10890.3	Proponionic acid (proponate)		18.4642	132	-6030.51
8.545	151	174.489		16.1825	102	11239.5	L-threonine		19.0867	117	-10199.8
8.68083	77	161.6		16.4433	232	14165.3			21.8525	147	-82447.6
8.72417	125	5		16.4692	114	19558.9			22.2125	145	-7642.82
8.7375	113	48563.4		17.6558	70	27878.5			22.26	85	-49116.2
8.79583	186	4229		17.7017	60	10618.4			22.3183	329	-54888.7
8.8575	295	182.8		18.0208	256	35659.4			22.3192	328	-262599
8.92917	319	-38.1556		18.0617	149	49698.4			22.3483	70	-81231.9
8.935	275	18.6222		18.0633	119	7536			22.3525	76	-17314.9
9.025	146	106.2		18.27	152	6145			22.3842	114	-153515
9.02583	229	36.1778		18.3342	155	5479.38			25.455	75	-9870.2
9.0325	149	-2086.73		18.4175	131	13992			25.46	73	-66594.5
9.0625	173	113.378		18.525	102	40118.6			25.4633	74	-6649.44	ribitol
9.06417	176	762.556		18.5492	86	26006.5			25.4658	204	-20584.8
9.1075	73	-101572		18.57	149	6432.2			25.4675	133	-10898.6
9.20667	179	40.4444		18.5858	74	40985.1			25.9425	77	-12596.4	glycoside
9.2075	209	-40.7778		18.7383	232	12134	butanedioic acid		26.4875	77	-8780.71
9.30917	149	-2901.42		18.8267	66	9204.96			14.28	158	-1033.62	L-isoleucine
9.31667	77	-3619.67		18.8442	103	6297.4			16.1183	102	-1509.22	Serine
9.31917	63	-448.6		18.8633	232	12246.9			12.7767	242	-1030.91	valine
9.32	78	-446.756		18.87	160	5569.8
9.4125	158	-45.3333		18.9167	130	5167.2
9.45083	79	632		18.9342	130	5460.02
9.51167	116	686		18.9667	74	15089.2
9.52583	111	57		19.04	70	5631.93
9.5975	216	5.8		19.1792	89	10132.4
9.63417	68	184.756		19.18	174	51906.6	L-aspartic acid
9.68833	143	205.533		19.2433	254	22068.1	L-proline
9.70333	77	5962.27		19.2742	202	134422
9.73083	130	80.2222		19.3333	161	10489.3
9.7575	154	20.2		19.3383	203	27522.4
9.77167	75	-41612.5		19.34	100	796376
9.85	150	-59.2		19.3408	135	16585.1
9.86417	87	976.6		19.3483	148	81905.1	2-piperidinecarboxylic acid
9.87333	569	3		19.3558	103	43535.1
9.92417	78	142.556		19.3567	150	12042.4
9.92583	88	224.8		19.365	188	151429
9.92667	63	225.578		19.575	64	10729.1
9.93	126	78.6		19.8567	64	9261.18
9.94083	123	96.9556		20.0325	77	6260.18
9.98083	75	-15624.2		20.1517	84	18430	pentanedioic acid (glutarate)
10.0067	190	-528.578		20.4233	69	5503.2
10.0658	263	7		20.5917	84	19730.1
10.0842	68	205.667		20.84	157	8283.87
10.0992	191	-393.133		20.9517	157	9828.51
10.1025	163	-1295.53		20.9625	149	7691.62	glutamic acid
10.1167	115	-779.978		20.97	299	24520.9
10.12	176	-50.6667		21.2233	115	39450	acetica cid
10.125	86	-2183.11		21.2683	73	910907
10.1458	165	-2324.58		21.3225	144	10423.3
10.1875	103	1495.8		21.3242	102	27262
10.2533	212	25.6		21.3683	142	6978.6
10.2633	173	847.244		21.37	70	20624.6
10.2992	365	31.4		22.3983	330	18366.2
10.3192	429	-35.2222		22.4075	329	58222.7
10.3708	66	-91888		22.4117	328	208362
10.3825	154	-863.244		22.4167	327	426325
10.4125	136	-60.7778		22.4175	189	151317
10.4833	177	62.2222		22.4192	225	342856
10.4858	97	324.111		22.42	174	988869
10.495	130	534.6		22.4208	252	12194.7
10.5267	449	23.6889		22.4217	74	336339
10.5575	154	-238.711		22.4225	73	4.7496e+06
10.6508	66	21304.4		22.4242	86	358143
10.6558	442	13.8		22.4258	160	162896
10.73	76	8374.8		22.4267	133	642130	taurine
10.7308	81	6125.6		22.4275	117	80303
10.7758	78	-3794.04		22.4283	134	86291.2
10.9	63	481.044		22.4358	129	36743.8
10.985	186	-56.7111		22.44	75	274951
11.0025	192	41		22.4408	84	29180.4
11.0108	116	7891.2		22.4475	240	38600.5
11.0683	82	31.4444		22.4492	239	50316.7
11.0917	375	8		22.4692	131	184706
11.1025	356	9.6		22.7142	175	9707.47
11.1425	125	490.822		22.8092	66	6049.53
11.175	204	333.644		22.8317	77	10248
11.2292	130	9967.78		22.8467	75	49109.8
11.2433	118	165.8		22.8742	174	38503.9
11.305	103	3231.49		22.885	326	42554.7
11.335	197	82.6667		22.8875	100	39353.3
11.3375	110	-52.0667		22.9017	101	11806.2
11.3833	105	232.378		22.9575	66	5709.11
11.4708	249	101.8		22.96	70	5700.73
11.5225	82	92.2		22.9758	134	5782.82
11.5475	173	56.0667		23.0717	225	5008.27
11.5533	193	-428.444		23.1783	100	22690.8
11.5908	120	-1321.69		23.1808	326	17566.3
11.5942	203	1604.78		23.205	133	16858.7
11.635	123	266.667		23.215	75	25167.9
11.6667	89	4008.18		23.2383	117	8593.44
11.6708	148	13899		23.4225	147	34636.7
11.7642	95	235.8		23.4233	133	11277.1
11.7825	99	925.889		23.4775	86	17952.6
11.8533	170	156.867		23.6317	73	198952
11.8783	84	3117.8		23.6825	73	115922
11.9342	204	-193.378		23.7658	64	5065.78
11.9892	139	-938.867		23.9158	73	78071.2
12	198	-91.5333		24.0283	73	122952
12.0008	200	-48.2667		24.1183	147	10541.1	propanoic acid
12.0058	133	-15086.4		24.1558	86	12492.6
12.0083	115	-4180.69		24.1983	142	9362.42
12.01	77	-14162.7		24.3625	174	12328.2
12.0117	155	-1736.04		24.4217	133	5741.76	1,2,3-Propanetricarboxylic acid
12.0142	147	-41071.6		24.9058	217	43660	dl-ornithine
12.0217	246	-60.2222		26.6667	147	28958.3	d-glucose
12.0375	98	2305.96		26.8083	73	12929.6	d-galactose
12.0392	244	-919.378		26.905	147	16145.8	d-mannose
12.0483	240	-136.822		27.04	73	30722
12.055	102	2060		29.6533	73	8269.62	inositol
12.0625	179	-245.444		16.8633	101	3591.42	butanoic acid
12.07	120	383.2		36.1108	117	968.711	inosine
12.1792	109	-270.422
12.2208	86	4072.4
12.2442	204	351.933
12.2542	116	3527.6
12.2817	216	195
12.3575	82	845.022
12.4083	116	1876.71
12.4292	195	-523.356
12.44	191	-374.756
12.4508	133	-2863.51
12.4583	163	-1721.47
12.4633	117	-1938.89
12.4667	218	-237.733
12.5192	148	4157.84
12.5233	163	-2034.22
12.5275	189	72.8
12.535	250	44.6
12.5433	99	752.756
12.5683	197	28.3111
12.58	183	20.8222
12.5875	166	61.6667
12.5883	254	17.8
12.6658	78	-3798.8
12.7275	105	867.6
12.7767	242	-1030.91
12.8217	105	686.422
12.8383	69	-1192.11
12.8483	149	1753.73
12.8508	128	263
12.8725	70	2105.71
12.88	226	155.378
12.8892	215	-56.3778
12.9008	277	-29.8444
12.9683	84	707.4
12.9867	123	-57.5111
12.9908	86	602.089
13.0308	156	-494.489
13.035	244	-277.978
13.0442	129	-127
13.0592	99	1753.69
13.1533	178	29.6222
13.1867	113	-551.978
13.1908	105	-245.822
13.205	279	-69.8889
13.2525	91	257.911
13.255	170	76.2
13.2625	248	938.333
13.2642	220	97.3556
13.265	70	1258.62
13.2658	100	2085.2
13.2725	146	583.622
13.2883	181	190.311
13.2908	130	262.111
13.3325	93	342.822
13.3592	107	399.756
13.3617	137	309.356
13.3625	124	96.4222
13.3633	65	320.511
13.365	136	301.978
13.3658	121	547.533
13.3692	151	1557.27
13.37	181	803.244
13.3717	94	153.756
13.3733	150	351.733
13.3975	122	90.0667
13.4167	197	167.111
13.4308	66	383.8
13.4667	231	-811.778
13.4708	232	474.533
13.4758	91	101.089
13.48	130	364.044
13.4825	202	337.733
13.4892	86	2722.91
13.4933	174	1075.18
13.4967	89	4575.98
13.4992	231	3115
13.5008	108	534.778
13.5033	160	130.156
13.5067	114	441.911
13.5083	145	106.622
13.5108	220	-68.9556
13.515	185	217.089
13.5208	200	202
13.5242	220	64.8222
13.5508	188	201.178
13.6075	249	133.2
13.63	86	-82.2444
13.7175	148	815
13.7192	99	1530.4
13.7283	157	931.956
13.735	122	443.6
13.7358	92	66.6
13.74	150	628.6
13.7442	69	2828.47
13.7542	173	1982.38
13.7658	104	503.8
13.84	70	2592.87
13.8458	95	1156
13.8583	220	19.8667
13.9058	216	3824.69
14.0175	75	-352553
14.0292	104	-31928.5
14.0342	117	-67302.4
14.0517	434	-27.8889
14.0658	413	10.8
14.0833	73	-3.07118e+06
14.1058	142	-1387.09
14.1367	202	-3309.82
14.2442	116	794
14.2675	152	-582.422
14.28	158	-1033.62
14.3242	86	856.578
14.3383	184	-384.933
14.3658	216	-156.733
14.4092	128	-274.667
14.455	300	-13641.5
14.4717	284	1477.4
14.4917	143	-4800.09
14.4942	217	-294.711
14.4958	140	-432.533
14.6508	191	-3137.78
14.6867	211	10572.7
14.7733	171	-1153.53
14.8267	171	609.356
14.8292	367	23.6667
14.8558	135	13628.1
14.8733	249	-97.5556
14.8758	441	21.3111
14.8775	190	538.822
14.92	112	286.267
14.9275	79	9735
14.9825	135	5968.27
14.9958	227	545.489
15.0017	316	181.711
15.0392	118	2392.16
15.1583	299	10890.3
15.1775	132	375.489
15.1833	130	382.6
15.1858	136	834.133
15.1883	103	1323.22
15.1992	85	768.956
15.2875	215	3514.27
15.2892	229	1070.22
15.3058	167	614.711
15.3942	276	-30.1333
15.4058	260	-75.8444
15.4917	191	370.6
15.5758	245	19.2
15.6042	132	498.467
15.75	239	24.8
15.7983	216	-283.733
15.8025	116	-3290.2
15.8033	190	-260.156
15.8092	218	-4098.91
15.8383	142	3141.47
15.8442	141	840.578
15.8517	89	3795.09
15.865	113	1743.6
15.8658	86	1039
15.8758	107	42
15.9475	212	98.8444
15.9567	245	1801
16.0108	301	446.622
16.0133	446	6.8
16.0142	196	25.4444
16.0517	165	-446.533
16.0742	134	241.8
16.0933	255	296.844
16.1183	102	-1509.22
16.1192	269	29.7778
16.1825	102	11239.5
16.1875	84	520.289
16.1883	101	603.267
16.1967	256	34.7778
16.2425	207	150.978
16.255	138	6.2
16.2583	163	265.067
16.29	102	3327.4
16.3158	301	46.2
16.3392	262	81.6667
16.3417	70	1617.36
16.3558	89	1284.2
16.365	95	63.9333
16.3675	117	1280.8
16.3833	101	2278.89
16.3925	229	13.8
16.3975	96	38.5111
16.4008	119	-220.622
16.4108	211	268.4
16.4383	177	52
16.4425	233	2953.98
16.4433	232	14165.3
16.4442	234	1263.96
16.4608	217	815.8
16.4658	230	1387.87
16.4683	235	192.4
16.4692	114	19558.9
16.4708	189	390.8
16.4842	109	106.778
16.545	93	273.2
16.5917	193	169.533
16.5958	211	694.733
16.5967	66	73.6
16.6258	125	247.822
16.6683	70	657.578
16.7025	206	47.4444
16.7383	282	-36.6667
16.74	310	-33.9556
16.7417	294	-257.778
16.7467	146	-318.244
16.7533	178	-59.1111
16.7558	97	21.6
16.7708	189	-233.956
16.8167	222	-220.956
16.83	68	292.8
16.8392	213	27.2
16.8633	101	3591.42
16.885	128	-135.711
16.9142	215	46.3556
16.9267	171	63.6222
16.9933	104	585.422
17.0917	398	26.2
17.0975	271	125.467
17.0983	154	161.889
17.1	269	382.311
17.1067	270	407.511
17.2617	254	47.2
17.3442	170	506.244
17.355	316	254.467
17.3708	106	626.022
17.3775	387	12.4
17.39	111	819.533
17.4483	314	2194.87
17.485	78	1215.58
17.4875	283	152.333
17.4908	90	1066.6
17.535	173	-165.956
17.5483	161	262.156
17.59	170	261.6
17.6192	257	-192.978
17.6375	78	-90
17.6558	70	27878.5
17.6808	243	-298.289
17.6858	114	286.378
17.7017	60	10618.4
17.7033	111	61.8889
17.7133	62	-121.089
17.72	284	18.6
17.7783	77	1929.69
17.9333	183	904.244
17.9583	195	259
18.0067	96	840.089
18.0208	256	35659.4
18.0267	83	2262.6
18.0275	315	279.356
18.0283	124	1152.4
18.0317	168	424.822
18.035	165	2848.8
18.0367	304	-936.156
18.0558	120	3158
18.0617	149	49698.4
18.0633	119	7536
18.07	93	1986.38
18.1583	308	65.5778
18.1692	141	1625.29
18.1833	80	933.289
18.2033	181	-756.911
18.2042	146	785.2
18.2117	148	-80326.1
18.2442	82	-4913.56
18.245	171	-1087.02
18.2475	188	-113863
18.27	152	6145
18.2717	90	1534.67
18.3342	155	5479.38
18.365	181	694.156
18.4175	131	13992
18.4342	76	-6444.2
18.4375	71	-5744.76
18.4575	130	-2958.78
18.4617	81	-2511.2
18.4642	132	-6030.51
18.4833	130	4200
18.525	102	40118.6
18.5317	87	4035.49
18.5492	86	26006.5
18.57	149	6432.2
18.5808	161	481.378
18.5858	74	40985.1
18.6358	214	351.933
18.7342	69	3446
18.7383	232	12134
18.7858	164	542.622
18.8058	154	959.2
18.82	234	1318.62
18.8267	66	9204.96
18.8442	103	6297.4
18.8492	144	591.956
18.8633	232	12246.9
18.87	160	5569.8
18.8742	144	670.022
18.8775	204	-276.667
18.9167	130	5167.2
18.93	307	272.067
18.9342	130	5460.02
18.9517	131	3827.56
18.9667	74	15089.2
19.04	70	5631.93
19.0517	198	133.333
19.0525	308	89.2
19.0725	141	751.667
19.0758	180	233.533
19.0842	111	2199.31
19.0867	117	-10199.8
19.1	204	-929.822
19.11	218	-898.222
19.145	224	86.1333
19.1483	318	47.4
19.1492	129	1509.8
19.1642	135	-1179.22
19.1792	89	10132.4
19.18	174	51906.6
19.1925	252	867.2
19.2075	137	454.4
19.2125	314	356.733
19.2267	123	243.444
19.2433	254	22068.1
19.2683	313	35
19.2742	202	134422
19.3033	167	1872.8
19.3233	228	1488.8
19.3325	238	207.422
19.3333	161	10489.3
19.3383	203	27522.4
19.34	100	796376
19.3408	135	16585.1
19.3483	148	81905.1
19.3558	103	43535.1
19.3567	150	12042.4
19.365	188	151429
19.3833	243	893.333
19.3933	301	1339.76
19.4017	361	12
19.4283	63	1984.51
19.4492	193	472.311
19.575	64	10729.1
19.6575	190	-461.4
19.6842	68	1163.38
19.705	214	316.356
19.7442	70	3111.22
19.8283	162	74.8444
19.8542	70	1627.4
19.8567	64	9261.18
19.8658	192	67.0222
19.8683	225	41.4
19.925	69	1464.84
19.9992	69	1184.33
20.0325	77	6260.18
20.0517	91	1177.71
20.0658	209	216.867
20.0675	78	358.244
20.0875	160	-3172.31
20.1025	290	116.489
20.1358	70	4654.2
20.1367	184	169
20.1517	84	18430
20.1592	290	13
20.1725	76	1246.44
20.1783	288	-28.6
20.2008	63	147.578
20.2042	162	3344.07
20.2117	64	2633.71
20.2167	246	1975.42
20.2467	157	4902.27
20.27	217	-1552.89
20.3058	146	563.6
20.3708	149	1823.93
20.3975	65	74.4
20.4033	173	2361.4
20.4058	187	1374.29
20.4233	69	5503.2
20.4325	140	1129.02
20.4658	145	-859.867
20.5708	185	116
20.5917	84	19730.1
20.6	193	88.6
20.6158	130	1788.44
20.63	248	1125.93
20.655	119	298.022
20.6717	128	4802.38
20.6792	62	83.0222
20.6833	281	28.4
20.7292	241	121.511
20.8283	93	268.4
20.84	157	8283.87
20.9267	258	3545.51
20.9517	157	9828.51
20.9625	149	7691.62
20.97	299	24520.9
20.9842	151	-601.778
20.9975	137	2856.56
21.0458	103	4723.04
21.1367	282	34.2
21.1433	347	155.4
21.1542	137	1677.31
21.1992	63	1155.11
21.2217	276	2173.73
21.2233	115	39450
21.2683	73	910907
21.3225	144	10423.3
21.3242	102	27262
21.3283	486	31.8222
21.3683	142	6978.6
21.37	70	20624.6
21.3833	191	-373.556
21.4208	198	426.2
21.4242	211	519.556
21.4883	70	4097
21.5208	140	1069.87
21.5325	86	2501.67
21.5367	198	306.8
21.5475	98	1182.44
21.5733	98	1002.04
21.6733	134	34.2
21.675	316	522.4
21.6942	156	-1463.4
21.7142	70	3412.78
21.7392	148	568.8
21.7475	375	27.8
21.7667	218	-1241.6
21.7758	70	4580.71
21.8275	67	-1146.64
21.8525	147	-82447.6
21.9383	70	1247
22.0033	70	953.578
22.2125	145	-7642.82
22.2475	218	-1965.22
22.255	310	274
22.26	85	-49116.2
22.2983	420	250.156
22.3183	329	-54888.7
22.3192	328	-262599
22.3483	70	-81231.9
22.3525	76	-17314.9
22.3842	114	-153515
22.3983	330	18366.2
22.4075	329	58222.7
22.41	229	3599.98
22.4117	328	208362
22.415	349	1006.27
22.4167	327	426325
22.4175	189	151317
22.4192	225	342856
22.42	174	988869
22.4208	252	12194.7
22.4217	74	336339
22.4225	73	4.7496e+06
22.4242	86	358143
22.4258	160	162896
22.4267	133	642130
22.4275	117	80303
22.4283	134	86291.2
22.4358	129	36743.8
22.44	75	274951
22.4408	84	29180.4
22.4433	280	1507.04
22.4475	240	38600.5
22.4492	239	50316.7
22.4692	131	184706
22.5317	182	531.111
22.545	203	986.578
22.5875	69	3346.38
22.5883	325	1135.49
22.6017	277	79.9778
22.6525	121	603.622
22.68	120	907.556
22.7142	175	9707.47
22.7242	107	513.222
22.75	240	1872.87
22.7742	204	919.022
22.8092	66	6049.53
22.8242	144	565.867
22.8317	77	10248
22.8467	75	49109.8
22.8742	174	38503.9
22.885	326	42554.7
22.8875	100	39353.3
22.8925	151	188.222
22.8975	229	550.356
22.9017	101	11806.2
22.9083	221	709.644
22.9308	200	1527.02
22.9542	115	4616.24
22.9575	66	5709.11
22.96	70	5700.73
22.975	248	-1072.56
22.9758	134	5782.82
22.9942	119	2949.96
23.0433	119	1226.67
23.0717	225	5008.27
23.115	134	2253.67
23.1517	185	72
23.1658	135	908.378
23.1783	100	22690.8
23.1808	326	17566.3
23.1892	134	3645.04
23.2008	65	450.089
23.205	133	16858.7
23.215	75	25167.9
23.2208	60	4905.16
23.2325	118	959.267
23.2383	117	8593.44
23.24	129	1667.78
23.275	196	1931.6
23.2925	148	2390.4
23.3025	216	188.578
23.31	333	41.9556
23.3158	161	429
23.335	134	2657.98
23.3525	152	91.6
23.3867	221	183.222
23.3917	117	2368.38
23.4225	147	34636.7
23.4233	133	11277.1
23.4317	88	966.6
23.4383	160	2573.69
23.4667	117	4256
23.4775	86	17952.6
23.4992	150	45.4
23.5542	173	485.044
23.5567	203	16
23.5842	69	221.267
23.5992	226	472.889
23.6317	73	198952
23.6483	161	391.889
23.655	228	17.2
23.6642	288	36.0222
23.6667	204	-199.867
23.6725	160	1523.78
23.6825	73	115922
23.7292	225	722.867
23.7658	64	5065.78
23.8258	215	48.6444
23.8417	144	34.0222
23.8592	299	57.6
23.9158	73	78071.2
23.92	169	78.2
23.9575	126	217.156
23.9617	171	133.756
23.9625	71	778.733
23.9633	148	787.978
23.9675	64	2150.64
23.9825	143	652.6
23.985	245	94.0444
23.9992	190	28.3778
24.0042	158	218.067
24.015	111	290.933
24.0183	159	296.156
24.0217	169	752.556
24.0283	73	122952
24.0325	113	739.622
24.1183	147	10541.1
24.1558	86	12492.6
24.1983	142	9362.42
24.2075	60	391.2
24.3233	175	2849.29
24.3625	174	12328.2
24.3975	131	-1509.53
24.4058	219	114.089
24.4217	133	5741.76
24.4333	102	2067.36
24.4692	70	-4378.76
24.48	146	-2581
24.505	172	2955.09
24.5508	218	-583.667
24.5658	247	76.3778
24.6025	190	-178.111
24.6317	98	-2630.62
24.6483	225	651.311
24.6733	167	1023.8
24.7192	418	11
24.7758	94	859.2
24.7817	345	53.6
24.7825	121	1162.27
24.8708	79	1578.22
24.885	269	353.467
24.895	192	4585.8
24.9025	108	605.089
24.9058	217	43660
24.9592	152	1502
25.025	225	518.733
25.0408	274	53.3778
25.0892	114	830.089
25.1325	256	167.244
25.19	445	3.8
25.2383	208	73.5333
25.3208	65	71.4
25.35	156	188
25.4142	144	325.4
25.415	118	461.067
25.4275	264	14.6
25.445	229	-69.6667
25.4475	192	-208.333
25.45	163	-407.8
25.4508	91	-230.711
25.4542	103	-3094.44
25.455	75	-9870.2
25.4575	116	-1754.87
25.4583	148	-1103.13
25.46	73	-66594.5
25.4608	132	-975.178
25.4625	117	-3617.64
25.4633	74	-6649.44
25.4642	205	-4778.13
25.465	89	-4780.4
25.4658	204	-20584.8
25.4667	129	-4991.89
25.4675	133	-10898.6
25.4683	119	-714.022
25.4692	135	-650.667
25.47	149	-1098.33
25.4708	157	-463.422
25.4717	90	-461.333
25.4725	185	-142.467
25.4733	70	-287.156
25.4758	146	-379.933
25.4792	132	341.2
25.4825	69	248.2
25.4942	78	-314.356
25.4967	152	-788.644
25.4992	401	17.3778
25.545	75	83.6
25.555	333	-22.6667
25.5767	64	99.1111
25.6	189	75.5333
25.625	129	553.4
25.6325	160	35.9778
25.6475	170	247.267
25.6558	62	46.0667
25.6633	75	3398
25.6867	314	582.422
25.6875	66	119.511
25.6925	94	235.044
25.7183	86	2018.49
25.7533	72	1633.6
25.7592	254	37.2222
25.7933	304	22.6
25.815	199	4
25.8283	124	90.9111
25.8617	229	68.4
25.9392	253	55.2
25.94	188	-1241.02
25.9425	77	-12596.4
25.9875	66	1737.49
26.0142	156	2221.71
26.2742	248	70
26.2942	203	450.6
26.295	255	42.7556
26.3275	130	1772.16
26.4875	77	-8780.71
26.5125	68	1922.98
26.5875	405	18.6889
26.5892	330	96.1333
26.595	322	30.4
26.6092	327	103.133
26.6283	77	814.778
26.6667	147	28958.3
26.6725	148	4659.13
26.6875	222	152.533
26.69	281	94.0889
26.7292	148	-1322.11
26.7875	220	497.133
26.8083	73	12929.6
26.905	147	16145.8
26.9542	93	106.422
27.0175	237	28.4444
27.025	143	286.067
27.0358	74	3721.53
27.0367	217	1914.49
27.0392	95	285.533
27.04	73	30722
27.0417	130	505.4
27.045	116	461.956
27.0483	72	808.267
27.0625	315	17.4
27.0658	68	820.356
27.0667	327	25
27.075	66	491.044
27.0842	301	24.8
27.0925	96	24.2
27.1317	72	714.111
27.3083	61	99.1556
27.3317	319	-66.7111
27.3467	64	26.2
27.3542	113	23.4
27.4225	217	196.422
27.4425	66	382.467
27.4442	117	89.9333
27.4592	64	-74.5556
27.4675	189	64.2667
27.4817	133	59.1333
27.4875	246	17.6
27.5008	86	81.5778
27.5042	66	-147.333
27.5075	149	-87.7778
27.5783	109	62.4222
27.5983	301	10
27.6425	82	83.4
27.6508	130	55.8444
27.6542	83	131.044
27.6833	74	-746.511
27.7025	171	-38.3333
27.7067	85	159.622
27.8475	64	80.7111
27.8917	76	123.489
27.9025	160	33
27.9067	133	57.6
27.9108	74	120.8
27.9133	138	5.8
27.9767	207	108.333
27.9833	81	12.2
28.0167	78	63.2889
28.0225	160	26.2222
28.0258	96	19.6
28.0492	181	15.2
28.1533	64	109.4
28.1892	537	15.6
28.1933	118	85.7778
28.2042	85	43.6444
28.2125	101	211.133
28.2358	68	33.2667
28.2367	88	86.0222
28.275	77	-184.111
28.2967	95	49.2222
28.2992	70	291.6
28.375	537	7.8
28.38	301	19.9333
28.4333	82	25.2
28.4475	74	89.6667
28.5075	61	-164.333
28.6192	60	223
28.6308	125	40.0444
28.6392	77	524.4
28.74	76	-463.467
28.7442	116	124.2
28.785	129	356.8
28.8375	60	137.6
28.845	211	11.8
28.9183	188	48.6
28.9442	64	-44
28.9758	261	4.8
29.0475	221	905.4
29.1225	370	24.7778
29.2167	234	43.5556
29.2233	65	178.6
29.245	98	99.3778
29.36	88	28.4
29.3683	69	26.2
29.3725	174	586.178
29.3867	247	60.5556
29.395	306	73.4
29.4008	114	118.2
29.49	78	52.6
29.4942	203	32.5778
29.5	193	40.0889
29.505	191	22
29.5275	86	49.2667
29.5608	123	25
29.6533	73	8269.62
29.685	142	65.2
29.7158	221	139.467
29.7875	142	175.044
29.8367	173	30.8
29.8525	85	66.2667
29.8883	146	31
29.8967	196	21.1556
29.92	179	9.2
29.9225	101	-339.133
29.9908	130	-374.867
30.0583	75	358.044
30.0983	128	5.2
30.1158	93	33.2667
30.1283	179	18.4
30.1683	68	30.8
30.1725	91	43.8
30.1858	234	7.2
30.2158	133	287
30.2242	221	16.2
30.2933	161	16.4
30.4642	129	169.2
30.4675	160	120.311
30.4742	98	15.2
30.4758	179	7.8
30.48	75	555.222
30.4933	218	149.733
30.525	114	50.5111
30.5833	207	16.4
30.5892	63	-60.7778
30.6033	134	23.6
30.6167	79	56.3111
30.6267	174	106.022
30.6308	142	54.6
30.755	60	-118.578
30.7583	78	49.2222
30.8208	189	32.2667
30.8475	107	15
30.8492	247	8.6
30.8708	82	10.6
30.8917	89	42.7111
30.9033	486	4.2
30.9183	188	27.4
30.9467	173	15.3556
30.9767	99	23.0222
31.0492	135	-40.3333
31.0583	207	91.2
31.0617	205	201.956
31.1833	133	-597.556
31.1975	168	17
31.1983	125	18.4
31.2442	82	41
31.2483	369	40.9556
31.2492	93	39.0444
31.2583	197	9.4
31.3	331	8.6
31.3258	130	31.2
31.4275	65	25
31.4325	78	61.4
31.475	299	23.6
31.4867	114	16.4
31.4917	72	55.2
31.5458	66	50.1556
31.5483	134	53.1778
31.5492	68	-65.1111
31.5625	77	281.756
31.6683	133	83.4
31.8642	78	-54.4222
31.8675	70	10.4
31.9283	77	160.156
31.9292	91	13
31.9417	69	69
31.9492	82	9.6
31.9567	70	58.4222
32.0183	193	25
32.0483	130	31.6
32.0667	75	382.844
32.1042	191	14.3556
32.1117	86	39.8889
32.12	180	10.2
32.1375	179	12.4
32.2442	211	33.8667
32.3117	92	-22.5556
32.4017	76	145.311
32.4867	78	53.1778
32.5	359	13.6
32.5083	64	117.311
32.5192	85	40.2444
32.5233	75	1799.38
32.5342	81	101.733
32.5783	74	169
32.6767	130	47.6
32.6967	85	23.4
32.7192	78	72.1111
32.7242	326	24.6
32.7308	89	53.6444
32.7442	381	4
32.7458	91	26.5778
32.7875	150	18.4
32.825	132	34.3333
32.8717	77	-198
32.9008	197	4.2
32.9025	133	95.3556
32.9042	71	35.8444
32.9192	134	10.6
32.9408	83	24.1778
33.0225	188	20.4
33.0583	100	-24.1111
33.0842	91	13.6
33.1083	104	150.067
33.2267	106	19
33.24	132	22.6
33.2408	64	74.3556
33.2475	93	35.4
33.275	135	-30.3333
33.295	87	-39.8889
33.3675	207	62.8889
33.3692	100	59.3778
33.3758	60	54.5333
33.4083	174	55.8
33.4342	116	76.5778
33.4533	402	5
33.4808	130	59.8
33.5358	65	20.8
33.54	217	-51.2222
33.5558	350	5.6
33.5883	332	12.6
33.6033	99	8.4
33.6233	193	-36.3333
33.6267	133	66.7333
33.6317	61	-55.6667
33.745	64	77.2444
33.7508	153	44.2222
33.795	86	11.6
33.7958	92	33.1556
33.8542	108	10
33.8992	96	48.7333
33.945	69	46.4
33.9467	160	38.4
33.95	67	55.8222
33.9717	102	30.9111
33.995	83	29.1333
34.0067	99	19.7333
34.0108	513	8.6
34.1308	179	13.6
34.1433	207	-133.778
34.1933	80	-25.1111
34.205	125	8.8
34.26	197	12.1556
34.2642	207	-46.3556
34.275	132	12.8
34.3483	95	-28.1111
34.4117	89	-243.333
34.5392	322	39.5778
34.5583	133	194.356
34.6767	162	11.4
34.6817	164	15.4
34.7033	93	-31.2222
34.8625	130	23.8
34.8817	229	37.0222
35.0375	91	73.8444
35.1142	85	120.444
35.1242	136	-37.6667
35.1408	71	128.644
35.1442	89	40.2444
35.19	221	44.9333
35.2675	131	23.4
35.3492	92	43.4
35.3667	160	96.3333
35.3792	64	56.0444
35.41	144	16.2
35.4475	100	-26.1111
35.4658	87	-28.7333
35.495	105	-65.6667
35.5042	91	56.4
35.5067	100	32.2222
35.5875	60	51.5333
35.6233	207	52.3556
35.6525	211	16.8
35.7375	131	16.8
35.7775	106	36.1778
35.8525	91	37.2
35.8708	208	83.0444
35.9117	61	93.9556
35.9383	133	-75.6667
35.9417	127	2.6
36.1108	117	968.711
36.1408	115	686.2
36.19	164	1280.6
36.225	136	320.6
36.275	200	24.4
36.2817	169	862.533
36.3317	98	206.2
36.3542	133	1335.51
36.3908	103	4552.38
36.5625	217	3734.13
36.5708	63	-55.5556
36.5742	117	600.4
36.5917	259	1021
36.6617	211	27.7111
36.7033	245	1738.33
36.71	145	84.4
36.7308	79	67.7556
36.75	259	645
36.8358	119	36.4
36.9367	62	-52
36.96	69	279.2
37.0092	60	-57.4444
37.0225	415	3.8
37.2	71	39.9556
37.2525	99	57.3556
37.2625	76	71.7333
37.2742	157	15
37.3092	93	28.2
37.3225	69	27
37.3242	79	68.6
37.3583	85	28.8667
37.3767	324	8.17778
37.4292	282	19.6
37.4933	60	81.6
37.5258	282	51.9111
37.5917	92	-36.8889
37.6075	76	47.9778
37.6417	119	11
37.6592	92	10
37.6867	78	-91.3778
37.7142	116	45.6444
37.7192	72	84.7333
37.7533	79	62.6
37.755	65	32.6
37.7692	138	12
37.8017	108	5.4
37.8467	179	11.6
37.8642	170	116.756
37.8683	102	82.2444
37.8775	217	156.8
37.8875	271	106.489
37.9875	82	46.8
37.99	150	45.4
38.0058	130	287.378
38.0158	115	223.689
38.0225	324	18
38.0558	113	126.022
38.12	74	1143.58
38.15	81	63.6222
38.2175	307	16.2
38.25	395	9.6
38.4275	130	77.6889
38.4442	119	37.2
38.4475	146	52.8889
38.4942	299	-145.111
38.54	480	5.6
38.6092	357	47.8
38.6675	191	468.267
38.6692	70	152.8
38.6792	71	366.089
38.6917	82	87
38.7058	204	962.756
38.8317	103	2204.4
38.8375	69	528.467
38.8392	83	152.422
38.8583	75	1714.6
38.8717	169	425.2
38.9	321	84.6667
38.9067	446	7.6
38.935	94	-38.2222
39.0425	77	84.4
39.0942	208	24.9778
39.1142	71	31
39.1383	221	33.8
39.1508	135	-36
39.1517	95	37.6667
39.1558	83	17.4
39.2175	73	223.133
39.2208	103	65
39.2283	83	51.7111
39.2292	76	24
39.2358	129	37
39.2967	67	56.6
39.305	73	329.2
39.3108	105	14.2
39.3425	66	99.6
39.3625	103	75.4667
39.4075	93	52.0889
39.4458	72	40.1111
39.5508	72	81.4889
39.59	103	212.311
39.7242	103	80.4
39.7267	91	40.8
39.7325	73	4200.13
39.7417	355	233.156
39.7433	76	-73.6667
39.7742	93	79.8444
39.9642	70	66
39.9658	77	191.622
39.97	304	4.8
39.9733	82	26.6
40.0408	76	41.8
40.0508	67	30.4
40.1367	67	96.2222
40.1592	83	28.2222
40.1608	117	43.1111
40.1717	397	6
40.2575	231	24.8444
40.2617	144	14.2
40.2683	162	7.6
40.27	207	-128.356
40.2967	130	64.4444
40.3233	64	88.6
40.34	100	48.4889
40.3433	135	46
40.345	72	22.6889
40.4058	538	8.6
40.4508	73	722.822
40.4592	193	-27.0222
40.47	109	36.9778
40.4758	130	53.4667
40.4783	69	66.3556
40.5283	82	140.111
40.5342	73	3428.33
40.5658	224	18
40.575	141	12.4
40.5833	117	136.622
40.585	102	73.5333
40.6108	427	20.6667
40.6633	221	23.2
40.6983	75	274.889
40.7325	197	20.4222
40.7442	108	21.2
40.76	209	-35.1111
40.775	96	-43.5778
40.7833	93	44.3333
40.81	70	47.8667
40.8192	207	27.2
40.8308	101	30.6
40.9	61	-98.6667
40.9025	96	-59.3333
41.0358	218	111.444
41.0408	113	65.4889
41.0658	64	-120.578
41.1	62	82.3111
41.1283	299	19.4
41.1708	94	39.2222
41.18	71	41.0889
41.185	95	31.6
41.2225	82	64.8667
41.2542	130	53.2
41.26	72	75.2444
41.2667	154	18.3778
41.2725	114	29.6222
41.3108	419	7.6
41.4283	71	145.978
41.4758	115	141.2
41.6292	77	251.778
41.6392	81	-69.2222
41.6525	99	32.4
41.6992	64	-182.444
41.7358	352	6.6
41.7508	71	-45.1333
41.7625	62	53.5333
41.79	176	9.6
41.8275	71	40.6
41.8317	135	21
41.8508	69	65
41.8575	64	107.333
41.9767	148	12
41.985	120	17.8
41.99	67	-52.8889
42.0183	281	35.8
42.035	109	24.6889
42.0475	61	57.8222
42.1083	599	31.4
42.2117	95	60.8222
42.2717	119	52.6444
42.2858	71	49.4222
42.3358	120	26.8
42.3758	208	48.2889
42.4258	193	-75.8
42.5167	148	76.3556
42.5242	92	24.4
42.5258	73	133.4
42.5375	91	18.2
42.6033	139	24.2
42.6092	285	18.8
42.6283	179	18.2
42.685	90	53.5111
42.7092	72	70.1111
42.7283	133	-812.356
42.8175	118	33
42.8417	69	-59.5111
42.9	137	28.0889
42.95	74	233.711
42.9525	91	47.4667
42.9683	179	25.6
42.97	117	36.4667
42.9775	163	27.6
42.9958	150	25.2
42.9992	208	78.5111
43.0033	76	63.2
43.0342	117	101.378
43.0917	283	29.7778
43.0992	167	23.9333
43.1208	190	8
43.1292	135	62.3556
43.13	71	72.0889
43.1325	151	41.9111
43.1333	103	228.133
43.1383	129	91.4222
43.1458	105	190.222
43.1542	93	44.2667
43.1883	246	10.6
43.2717	79	71.5333
43.3283	73	341
43.3933	65	74.4667
43.4	166	22.9556
43.4042	62	55.0444
43.4342	261	8.6
43.4558	81	189.711
43.5067	96	36.3333
43.5658	60	49
43.595	75	706.8
43.6242	60	97.6222
43.7567	193	-44.7333
43.8025	65	19.8
43.8042	95	36.2
43.8475	206	30.1333
43.8517	74	-77
43.8542	69	98.2
43.9625	67	46.6
43.975	77	-297.756
43.9758	70	39.1333
44.055	106	22.4667
44.0667	137	-50.7778
44.07	135	-61.6222
44.0775	179	11.8
44.1233	283	41.8
44.14	64	119.933
44.1758	66	-86.5556
44.1867	76	104.956
44.1875	88	18.4667
44.1883	207	183.2
44.2308	193	-113.133
44.2358	83	54.2
44.3017	60	70.2444
44.3192	69	66.8222
44.3525	76	96.7333
44.3967	72	30
44.4067	64	222.4
44.4142	85	53.4
44.435	207	-84.7778
44.4467	133	124.4
44.4542	321	8.2
44.4558	129	60.8
44.4633	150	11.2
44.4892	83	65.8
44.5133	119	42.2
44.57	60	51.4222
44.5892	89	-54.2222
44.595	72	50.4889
44.6242	60	85.2
44.6733	115	33.3111
44.7025	191	67.4
44.7258	115	26
44.7275	71	39.5111
44.73	72	52.8
44.7742	117	48.4889
44.8733	92	64.2
44.9	132	15.2
44.9117	179	39.4444
44.9508	76	75.7778

[truncated: 10 more sheets: Mix D10, Mix D18, Fluox D1, Fluox D5, Fluox D10, Fluox D18, DEET D1, DEET D5, DEET D10, DEET D18]
